# Supplementary material for: Morphometric approach to 3D soft-tissue craniofacial analysis and classification of ethnicity, sex, and age
Source: PLoS One. 2020 Apr 9;15(4):e0228402. doi: 10.1371/journal.pone.0228402 (PMC7145022; doi:10.1371/journal.pone.0228402)
Supplement: S2 Data — (XLSX) [file pone.0228402.s002.xlsx]

## Sheet: pca
ID	Ethnicity	Age	Sex	Centroid Size	PC 1	PC 2	PC 3	PC 4	PC 5	PC 6	PC 7	PC 8	PC 9	PC 10	PC 11	PC 12	PC 13	PC 14	PC 15	PC 16	PC 17	PC 18	PC 19	PC 20	PC 21	PC 22	PC 23	PC 24	PC 25	PC 26	PC 27	PC 28	PC 29	PC 30	PC 31	PC 32	PC 33	PC 34	PC 35	PC 36	PC 37	PC 38	PC 39	PC 40	PC 41	PC 42	PC 43	PC 44	PC 45
0001mwb12	white british	12	m	2147.34	146.58	73.256	10.812	-18.184	-61.9	-9.4545	31.918	-67.321	41.838	16.545	34.08	15.311	0.88518	17.305	-1.5824	4.9351	13.755	-18.371	-19.176	-12.237	0.30765	-0.24511	7.8487	6.3462	-0.84378	14.218	7.0408	0.80219	-5.1564	4.4964	5.3	2.4752	-8.2977	-7.8284	-8.298	0.22934	4.6838	0.65554	3.4306	-11.303	-8.5083	3.0714	-2.3658	8.4144	-1.1905
0002mwb12	white british	12	m	2243.51	31.835	23.382	-11.626	-18.452	-51.372	-14.145	-73.748	-94.336	-15.572	-43.952	11.103	33.788	16.593	7.4223	18.313	30.032	-4.4518	0.5033	-2.496	0.17528	3.8907	4.182	10.173	16.428	6.0636	0.63921	-5.1682	-5.8488	3.5943	4.0992	4.643	6.02	-4.3641	4.9343	-2.8893	-2.7399	-3.0876	-0.40677	-1.2396	3.9873	-8.2023	10.562	-6.4123	9.9253	-5.5212
0003fwb12	white british	12	f	2121.14	134.28	-57.185	23.635	-16.577	-23.388	-43.763	-54.079	-50.843	16.729	-15.753	13.702	9.8201	19.248	8.6435	8.2019	0.29631	0.8435	-5.1108	-1.3766	-8.1717	-13.142	-7.3086	12.26	-5.9373	-5.1691	12.964	-5.9821	-11.123	3.2149	-5.9419	-9.0102	-4.81	-0.65539	2.5391	13.815	-6.3488	5.7731	4.285	9.5665	6.0033	-4.5322	-2.5142	8.451	-9.884	-3.2133
0004mwb12	white british	12	m	2117.6	117	-16.883	-4.6067	-53.486	32.778	-22.882	-21.829	-9.0886	13.389	-6.1001	-30.267	-9.2767	23.587	-17.51	-2.8309	16.768	-11.198	19.997	-20.949	-0.48768	8.6044	11.71	-0.63684	-4.0178	11.606	7.3175	7.0104	-2.2157	-3.7563	0.46574	-3.4653	11.881	-6.1231	5.4884	7.0818	-2.0505	9.3951	1.9894	-2.6348	-3.8734	-6.3544	-1.1012	-12.153	-6.4143	5.2166
0008fwb12	white british	12	f	2115.64	144.18	73.142	4.8631	1.259	22.963	23.943	-17.567	23.764	10.254	10.392	-38.54	-6.738	-0.66098	-7.4695	10.085	55.142	4.0346	-9.2029	6.2807	-11.608	-0.37203	-9.5658	-0.65934	17.18	3.2019	0.21522	2.2759	-9.0586	-3.9628	-15.98	13.857	1.0205	-2.0432	1.4361	2.9581	-5.589	-2.006	-2.593	-1.988	0.58248	-10.651	-1.6253	2.6776	-7.9423	-11.28
0009mwb12	white british	12	m	2035.91	268.91	113.76	-38.208	-13.14	-33.459	-20.822	4.6736	-30.363	-17.068	22.661	15.806	12.604	15.539	-1.8445	6.5643	-10.871	-8.1425	-3.5445	-10.603	-9.6921	-4.828	6.3165	-6.3113	-7.5212	8.7642	-11.44	6.9351	-11.715	0.41337	1.774	6.1181	-4.4064	0.11907	-9.9783	-2.6822	0.3582	-10.454	3.2192	2.8656	-0.49287	-8.633	-6.4722	-8.9616	5.5865	3.3167
0011fwb12	white british	12	f	2020.33	237.25	-10.455	-65.947	11.568	11.702	-70.013	-28.649	-23.353	-16.085	-22.288	-47.884	1.1141	-0.86691	-22.659	-14.895	-18.19	-0.15944	5.0121	5.3342	-18.158	-0.82956	-7.9787	-0.63163	-9.0083	-4.6291	-10.162	0.15079	-9.1518	-19.594	-1.3664	7.587	-22.616	18.685	0.68304	3.384	3.6821	5.0709	-7.9389	-3.9013	-8.5388	-0.66962	12.293	15.446	2.1343	6.5952
0018fwb12	white british	12	f	1962.22	324.41	59.796	1.0934	-42.684	-36.936	-4.7942	-2.2751	12.941	5.3402	-14.86	-7.2123	0.043933	2.2533	-24.289	-13.98	-11.271	-20.692	-8.6234	-18.544	8.2359	12.429	7.3564	1.0455	3.6165	-5.3009	0.23046	-1.3486	9.7798	-5.4814	-2.4779	-16.925	-4.3385	6.5714	-9.8133	-5.2435	3.4427	2.5119	1.4659	0.55932	3.1368	-5.528	3.4676	4.7174	2.7058	-6.9074
0058mwb12	white british	12	m	2138.49	107.15	-21.012	8.7517	2.8464	23.736	53.416	5.5197	-59.564	14.888	24.627	26.278	-17.313	-12.454	1.38	-19.249	11.549	8.4813	-12.857	11.924	6.7176	-9.8951	-10.617	8.8521	3.7208	-0.57448	-0.45481	5.2108	1.2456	9.19	16.444	13.95	-6.0351	5.9606	1.0209	-2.8657	-5.3185	8.8504	4.0875	-1.8609	-4.1026	5.9222	-2.1559	-3.1919	8.7381	-5.3447
0063mwb12	white british	12	m	2034.83	239.45	21.946	-28.71	5.1636	-9.0086	5.5268	-1.8199	-47.999	1.7164	3.955	24.462	-1.333	10.894	7.082	0.05893	-31.566	-10.677	-14.881	-3.8211	2.2634	5.872	-12.242	-0.71071	-28.014	-4.5185	-24.784	7.2152	2.7844	3.85	21.149	-15.486	-12.954	10.317	1.5923	4.9388	-4.2138	-14.85	-11.271	-6.0549	-4.6251	-0.78721	-4.5927	4.3203	3.7203	3.2399
0064fwb12	white british	12	f	2079.45	180.48	-62.16	3.2129	28.812	-70.388	-92.629	28.425	4.2453	25.692	-48.713	27.936	-30.697	54.412	-10.233	-7.828	-18.263	-30.683	17.036	-3.8769	-12.139	4.1848	4.2297	17.592	1.0772	7.9712	7.0424	3.7303	-34.238	-5.1957	24.056	-15.334	-4.4966	18.115	14.39	13.475	-3.8859	-21.432	14.92	-0.95185	-1.6829	22.662	5.2947	-19.952	13.428	-3.9803
0070mwb12	white british	12	m	2046.39	180.41	-84.24	-28.878	39.349	51.953	-55.575	32.514	-11.545	31.522	23.989	0.48135	-27.347	24.398	9.9563	2.8365	2.9363	10.071	5.991	-17.676	0.32795	-6.4465	-10.415	13.751	-6.9045	11.043	-5.107	-10.066	-9.8698	-6.0022	7.6987	4.7724	10.283	-11.297	2.2259	4.511	0.92385	-1.8869	4.0638	-6.2324	-0.18169	-11.444	-8.1654	0.47896	1.0134	2.3291
0081fwb12	white british	12	f	2096.09	170.06	31.886	15.996	18.781	-21.037	-25.216	-10.061	27.032	37.759	-7.2684	-10.574	-4.317	-50.494	-9.7482	27.562	8.9621	-13.837	-0.90884	-5.7999	4.5608	25.905	-17.764	-2.977	0.73324	-12.245	-4.6554	-20.778	-32.204	-5.2362	-3.9771	-3.1644	-24.1	18.583	1.5808	-10.308	-4.1267	12.846	11.512	5.5031	-7.583	15.646	-20.306	5.1046	-10.515	2.0059
0101fwb12	white british	12	f	1951.21	304.55	-57.247	-48.354	7.7673	-26.206	3.338	-11.486	-20.118	0.44487	-58.797	9.553	-21.728	25.918	-5.4755	-4.0926	13.969	-1.7284	-0.58132	4.5546	3.0975	-5.5466	-22.656	-10.71	-13.486	-11.372	3.4955	-6.2974	3.8292	3.4489	9.0327	-9.9776	9.9113	-1.3889	6.2372	11.925	-3.5144	10.837	3.3506	3.5622	2.746	3.3639	-8.4636	11.325	-9.8151	0.2875
0104fwb12	white british	12	f	2159.13	102.34	27.24	-46.45	-50.478	-13.904	7.9331	-8.7241	-61.588	-6.3344	26.7	4.999	-7.063	-8.0592	23.303	-2.2227	-10.105	-12.602	9.714	20.555	14.508	-10.45	-0.52216	-4.8407	25.283	-0.2849	10.343	-11.65	-8.1718	-1.6927	4.7953	17.496	-5.9399	5.1799	1.6766	-3.4231	-1.3962	-13.405	-3.1347	-10.231	11.286	-6.466	9.576	4.2661	-9.4294	-1.3572
0117mwb12	white british	12	m	2050.2	246.16	116.53	-35.754	-4.512	-26.822	29.295	-9.6148	11.123	3.1848	-3.2081	-26.653	-16.075	-4.0589	33.765	23.972	-4.6903	34.483	-0.77425	-7.886	-27.159	-4.57	0.29721	22.378	-0.58166	-1.9668	6.3325	-4.5172	-17.824	-2.5971	-9.9918	3.8714	-12.449	-0.9724	-9.6377	-13.442	1.2449	-0.99108	4.4851	2.2448	16.053	-3.4382	2.7783	-19.021	-1.1442	3.2535
0122fwb12	white british	12	f	2261.92	-45.108	-49.656	8.4571	63.112	-9.015	-24.793	42.522	18.189	2.8611	-48.034	-18.153	23.427	8.2564	37.554	-29.133	-8.7495	6.7787	3.06	-2.8631	6.1356	0.19832	-4.9706	7.9949	2.199	6.192	24.854	-2.468	0.55401	-5.489	11.315	8.378	11.635	6.4239	3.3593	-8.6642	-0.55921	4.9185	-2.6776	0.11542	-18.91	-0.45151	-4.6534	-16.599	-4.7275	-4.0018
0129mwb12	white british	12	m	1954.24	287.64	-63.391	-23.764	-0.53688	-11.507	-8.2879	32.233	14.962	4.4765	-5.3487	-12.054	-19.142	13.874	-14.861	3.4893	-4.0811	1.0865	-0.70497	-15.018	-19.261	8.4529	9.2059	11.095	-1.9533	4.0701	-21.265	14.738	7.7689	1.8359	-16.771	12.112	-2.1246	-10.643	-7.7777	-1.7348	1.0209	4.5388	13.644	1.0592	0.13892	-3.2999	-3.0183	-0.89429	2.6958	-9.418
0133fwb12	white british	12	f	2068.51	193.29	22.079	-11.343	-8.6153	-13.573	-7.1145	18.779	-21.425	2.4996	-11.692	45.322	-15.124	18.37	-5.9068	6.0855	0.76329	8.9597	-4.272	8.0405	-7.0428	2.5533	-11.765	-1.6619	-6.1262	-7.8807	10.593	5.1005	-0.74475	-2.0049	13.258	-7.6844	-3.4211	-6.3751	-4.584	-0.29884	5.9326	-4.8427	-0.1259	-12.031	-4.3039	4.7687	-3.7177	7.6849	2.6968	-0.90075
0137mwb12	white british	12	m	1994.24	238.8	-83.095	-53.192	6.549	20.053	-40.358	-1.3225	-11.756	-22.277	9.898	31.369	-6.3013	30.62	-6.1734	2.9811	9.6522	-10.424	8.2387	-9.3366	2.5662	-10.527	-7.1909	-4.9238	-1.6901	-2.0904	1.6125	-6.5702	8.9398	-2.4809	4.2696	1.7419	-3.0562	2.788	2.1372	8.2857	-2.6733	-1.3402	3.8349	-5.0577	9.4467	-9.3185	-11.043	-2.3909	-0.62786	-2.325
0138mwb12	white british	12	m	2060.2	208.25	-6.8871	55.605	-40.837	22.269	-15.492	-7.1066	-68.228	74.916	16.367	-37.908	-1.0432	21.92	14.37	-0.58559	11.053	7.3255	16.773	-20.73	10.948	-0.46446	7.2802	6.0281	-2.8742	9.393	10.391	10.327	-1.1003	6.523	-12.092	-2.1128	2.5123	-6.4674	-4.5986	7.8671	-0.3801	2.2795	-2.2491	2.7878	-1.9036	-8.1271	6.7002	0.64737	5.9496	11.979
1016mwb12	white british	12	m	2094.78	155.64	-35.474	67.259	-57.479	-28.966	-6.1023	10.137	6.026	-24.64	40.939	33.976	-20.799	17.269	2.6578	13.303	-4.6434	-20.467	4.6492	1.5129	9.2014	-1.5592	5.8241	7.628	4.407	9.0918	1.2845	7.8123	2.1463	6.9857	-4.022	-1.5972	-1.5756	-1.0657	1.374	-0.7619	1.3132	-6.2125	4.1677	-1.5476	7.2975	-9.7363	-6.8869	-7.8434	-2.9221	-6.569
1046fwb12	white british	12	f	2190.52	50.749	-87.325	83.18	2.9089	-14.567	35.911	3.6587	-44.747	36.71	31.056	-47.995	3.6032	-19.937	17.736	2.1861	15.305	16.672	-16.848	-23.229	6.0829	-12.1	-10.368	30.045	0.72324	-21.378	-27.681	13.46	7.1148	12.407	-3.7018	-11.768	3.7836	10.967	1.2064	0.60591	-15.619	-15.822	-5.5437	0.020361	3.0691	4.0924	-5.0199	9.3992	3.739	-2.5767
1058mwb12	white british	12	m	1983.4	254.83	-25.477	-5.6621	-11.399	51.193	-17.202	10.726	0.75202	-15.733	-3.3311	4.2287	-2.3281	9.3035	-12.173	18.366	10.538	-11.663	0.55755	-15.225	-6.4162	24.637	-2.1813	-15.719	-0.20413	10.795	-9.642	7.4853	10.886	-1.401	-2.3209	8.9216	4.4957	-5.3961	-4.1909	-0.82454	-1.5241	-1.8381	1.2226	-6.79	-5.3354	-5.1939	1.0106	3.1734	-4.9453	-8.3405
1084fwb12	white british	12	f	2055.44	203.63	18.128	-29.163	-1.9596	-7.5457	-46.297	-43.152	18.627	-33.575	-30.47	-18.182	-9.283	5.0124	-17.559	9.6212	-3.0271	9.7872	4.3498	7.2458	-1.8569	-5.4096	-4.5775	-6.712	2.1199	4.0931	15.734	5.8131	-10.866	-1.1093	2.2188	2.034	-15.543	-4.2533	-1.0964	-0.82592	-0.96703	1.8142	2.9543	8.3749	6.0963	2.4046	-5.3443	1.4575	-4.3893	1.7931
1111mwb12	white british	12	m	1996.93	245.71	-63.74	37.838	-40.549	35.749	26.742	-42.433	-25.268	18.995	11.521	-17.945	31.955	2.8625	20.301	13.866	14.095	8.3193	1.5952	-3.2107	7.2487	-10.724	-2.9328	-11.067	-12.082	1.9351	-8.0228	-13.969	0.19516	-1.4356	-2.0786	7.3949	0.3137	-6.4732	-0.65509	-4.455	-5.8479	1.1019	9.2838	6.1583	11.894	-12.352	-4.0096	-3.387	-3.1997	-4.5574
1112fwb12	white british	12	f	1984.05	287.02	-22.332	-48.831	-18.397	-75.312	4.5392	-3.1624	6.7974	-14.116	12.562	-34.294	19.638	-22.383	-7.1225	10.946	-12.557	4.9973	6.3988	-0.82398	8.6245	7.9963	-8.4234	5.0922	10.975	-3.414	5.0175	0.36507	3.6845	2.7489	-2.9328	-0.42673	-1.0638	7.6081	-6.1538	-2.1788	0.12942	9.8583	-11.418	3.9578	7.0288	-3.9914	-5.3767	-0.69476	-3.6108	0.31214
1120fwb12	white british	12	f	1890.12	353.71	-78.618	-26.709	1.6882	34.296	14.57	20.969	-28.101	40.597	-31.292	18.271	-19.081	-18.354	39.57	2.5457	-3.5841	-11.971	19.079	16.685	0.58534	10.145	-2.7192	17.045	-8.5841	3.5181	-4.896	-3.0488	15.913	3.341	-4.1023	-11.772	19.145	9.5775	-8.6307	-6.1634	12.18	-12.206	-11.926	2.5695	-1.651	8.4803	-1.2696	6.7174	-6.4669	11.135
1122fwb12	white british	12	f	2006.34	255.47	31.488	32.036	-23.224	26.926	8.1091	-5.2961	7.6316	-2.9538	-18.138	-39.647	-21.778	-3.9663	20.337	13.713	13.949	-11	4.9753	-8.8239	3.6852	6.5488	17.56	12.046	-12.297	15.35	-7.226	-0.28322	-10.56	-0.88262	-6.2593	10.621	9.019	6.1022	6.9027	8.0412	-14.527	-2.506	8.4471	10.838	-5.3168	-16.644	-2.6609	-2.1074	5.7641	0.78457
1157mwb12	white british	12	m	1710.45	522.7	-92.302	-41.069	-15.565	75.477	21.522	36.91	15.14	3.9147	-10.748	-29.831	6.9305	-5.6918	-23.363	3.9455	-15.835	-9.6703	7.4294	11.201	-11.704	-7.3969	-5.3082	1.3384	0.69479	0.24646	-0.057419	2.3964	6.141	3.4273	-4.9886	-2.4243	-6.3215	17.462	-7.1749	5.3943	0.46641	1.8007	-2.5159	-6.7972	-7.0485	10.196	-7.1364	10.873	0.75771	-6.4731
1174fwb12	white british	12	f	1965.03	297.32	30.86	34.97	-22.38	40.157	21.456	-32.995	15.865	3.845	-5.586	-36.717	3.4226	0.13039	-15.905	6.2214	4.737	7.1592	-16.587	6.6809	-9.4762	-14.007	-10.043	9.1617	-7.7883	3.6181	2.4946	3.4635	-4.7258	6.8855	2.3298	-9.7842	5.6279	6.7342	-2.0191	-7.635	8.5459	0.39391	4.8863	-0.50145	5.992	5.3717	-6.0883	-1.9182	3.8156	1.877
1175fwb12	white british	12	f	1984.36	276.19	60.833	-37.854	-21.391	45.504	22.673	32.083	-6.172	-3.7797	22.855	-0.83502	-1.6355	5.4728	-3.4798	-2.8728	12.785	9.4999	9.2986	-2.4053	0.73469	-4.9647	-4.0036	-0.91991	-25.649	8.8164	1.8569	-3.8481	-7.7584	2.1543	5.1981	5.139	10.425	-1.0105	-2.2176	-17.751	2.0281	6.3292	-9.8402	-3.2496	-13.279	-3.627	-7.1518	-4.5389	11.368	1.1761
1209mwb12	white british	12	m	2168.15	114.11	89.238	147.95	-32.403	5.6452	98.676	-54.617	34.959	-8.6976	32.804	66.13	11.769	56.026	-30.086	32.75	39.647	-2.7792	38.465	9.3938	12.004	-7.0136	-29.206	32.087	-25.718	-17.859	-34.627	8.1709	-11.384	-27.731	3.3551	23.301	-5.6784	-10.632	-19.071	24.185	8.5447	21.455	-7.8415	6.4173	-9.1727	10.975	-4.1261	18.156	-20.635	-21.149
1261mwb12	white british	12	m	2220.73	42.986	20.761	40.305	-50.139	-65.664	-31.272	3.7308	-8.8671	-14.382	38.816	-20.337	5.7754	24.661	-22.051	9.8084	-18.882	-0.1348	-17.249	-1.5243	7.8078	-0.67993	-2.475	15.993	9.0211	-2.9615	20.97	15.619	-12.989	8.0081	19.81	-1.9909	-9.3849	-9.4229	-1.0672	3.9998	-4.6527	9.5957	-5.9311	-10.753	-2.7987	3.3984	6.5356	-0.26982	-7.5494	-2.383
1268mwb12	white british	12	m	2021.87	243.06	-70.783	9.3381	6.805	-54.453	32.178	-40.234	-27.458	-20.005	24.467	17.647	17.26	38.826	12.292	4.5913	8.379	-3.6942	-7.135	8.0558	23.088	-14.892	-8.8978	0.27095	-10.303	0.65135	13.225	0.31799	-7.4868	1.5232	14.539	-5.1012	-8.2991	0.70571	-2.4899	3.7934	-2.6763	-0.20222	2.4259	-1.2569	3.3392	-9.2156	-1.4156	5.7385	-5.5788	4.3115
1281fwb12	white british	12	f	1795.46	493.03	-16.873	-19.865	-28.073	-56.544	61.121	9.9178	-6.0447	-13.868	-43.147	5.4098	10.533	11.826	-7.9838	-8.2674	-16.041	2.1814	-0.033155	15.198	-0.80498	1.0068	-10.122	-6.5109	-4.7394	10.375	15.581	-2.3257	9.8242	0.11871	-6.6754	-4.0028	-8.5147	-15.601	10.087	-5.8594	9.4825	-1.8619	-12.879	-3.2369	-21.286	-12.349	0.70657	1.4132	-7.4907	-1.8449
1282fwb12	white british	12	f	1994.02	271.77	-29.358	-11.432	-34.964	-56.21	-39.993	10.312	-17.597	5.514	-25.969	-23.771	7.2876	-14.309	-9.6232	8.518	16.141	-6.9644	-8.0679	10.619	15.013	-8.9411	10.686	-2.8524	9.6517	6.2642	7.7707	-0.071119	6.9466	8.4083	2.4222	2.2885	2.1151	0.66775	23.568	12.841	12.839	-1.8702	3.5798	-0.089244	8.4306	-4.8192	2.5403	4.5503	10.65	-0.8529
1283fwb12	white british	12	f	1759.38	489.22	-42.624	-35.587	-4.4837	40.858	7.0512	49.796	14.911	0.60309	-27.928	-15.063	3.6869	13.112	-11.631	5.8974	8.6143	0.15244	-6.4587	-12.014	-12.303	-20.508	-4.7819	8.5975	3.5687	-13.421	-5.9499	0.31922	0.6253	3.8426	2.3592	0.49268	-0.82441	-9.9221	-5.5425	-1.9789	-2.7238	6.7797	-3.9575	1.2921	-0.44595	0.02546	-4.4208	-6.6376	4.3392	-1.0461
1284fwb12	white british	12	f	1740.45	474.36	-185.48	-39.407	6.6847	49.946	40.351	38.755	27.99	24.948	0.88161	34.086	15.234	1.1402	-9.6288	4.2013	-16.701	-19.178	0.64227	11.229	29.268	-6.9455	-3.2401	10.167	21.663	-0.19114	-11.835	-11.982	13.135	5.5513	-5.4928	-3.9091	5.8839	-2.6479	-9.5746	-6.6944	1.1627	14.696	-9.4553	12.534	4.2052	-19.935	-5.6562	-6.5233	5.7106	-7.8376
1292mwb12	white british	12	m	1924.5	326.77	2.6984	5.3754	-34.871	30.292	30.473	61.138	-17.626	39.141	-63.052	-15.612	-6.7925	7.7204	11.039	-8.2857	-16.991	-13.807	-27.165	27.355	-3.1816	19.763	7.1108	9.7986	-7.9409	-3.043	-25.695	-3.8811	12.856	-1.5014	-10.912	-5.5353	5.5372	-3.7354	-6.9328	-8.7392	4.2085	6.819	2.7	0.27464	-1.1282	5.1544	2.6104	-15.679	6.9854	2.2274
1296mwb12	white british	12	m	2035.8	253.85	24.689	-82.288	32.489	-73.17	-20.62	45.939	-35.964	27.181	-1.089	-19.628	-13.83	13.264	16.205	-6.6921	-10.25	14.414	-12.109	-27.482	23.504	1.0867	-4.6549	-3.5931	-2.2685	1.5245	-16.005	5.178	1.7254	-8.617	-20.252	17.189	4.9562	-10.212	-1.5456	-3.3527	-3.2694	-0.12485	-1.4113	13.66	16.512	5.4196	-0.04141	-7.1715	1.6587	11.662
1316fwb12	white british	12	f	2017.4	256.3	25.792	-112.01	29.467	-77.358	17.732	36.475	26.652	-6.2434	13.856	-5.9447	20.188	10.923	-26.603	-24.835	51.713	32.466	20.514	35.222	-7.5984	-4.7775	-17.521	6.4809	0.65979	9.8935	3.4528	10.226	-5.3907	3.5638	6.4228	8.0646	6.4724	-19.64	12.08	1.1816	5.5198	-21.155	3.5497	-15.189	12.957	-1.9976	4.5408	0.99871	5.1458	3.9357
1352fwb12	white british	12	f	2019.18	211.1	-156.31	-50.491	44.551	6.903	27.117	-30.564	-16.34	-16.379	41.93	10.034	3.1449	-15.419	29.521	20.337	12.103	11.88	11.333	4.4043	7.8882	8.3499	-3.0061	13.633	7.3547	4.0058	-4.2442	-6.8447	0.73792	12.91	11.493	-10.535	2.4631	-3.5141	-7.8648	10.008	2.8708	0.84578	-15.163	4.2655	2.5662	-1.9663	-5.7954	-0.82642	-3.0728	-7.0216
1363mwb12	white british	12	m	1781.43	456.61	-188.46	-7.2148	14.865	15.918	109.74	-33.554	55.003	33.006	13.329	27.021	-25.07	9.6666	-57.319	19.006	-13.455	-9.2309	-19.475	-13.532	-41.854	-16.067	-2.0517	-17.808	10.604	8.8267	40.882	-15.711	28.281	-5.3486	1.5438	20.882	-29.285	6.3314	-1.6043	15.964	-28.119	-33.731	1.5885	-8.1997	0.25235	30.921	20.211	8.7547	6.7715	11.014
1465fwb12	white british	12	f	1949.03	297.09	-50.124	-35.583	25.05	33.34	-4.5157	-43.926	8.9254	-18.284	-50.953	-42.361	-29.701	-1.2789	4.3472	13.443	-19.358	2.2677	-1.5446	5.7163	3.9609	21.839	-1.2751	-11.525	2.9328	8.2444	0.8161	7.1591	-11.291	-3.2969	-16.108	6.747	-0.019137	1.4052	-6.2083	-13.484	-0.089185	-5.2529	4.6182	14.043	3.554	1.3144	8.8763	1.1627	0.41069	-8.6209
0025fwb50	white british	50	f	2201.23	-5.8748	-49.031	-29.372	-1.4435	98.097	32.814	55.384	4.3113	20.443	5.3929	-20.079	25.363	-25.651	-27.275	15.528	1.0892	11.198	19.279	-13.877	-7.3792	15.937	6.4786	-4.2018	-9.1234	-4.0076	-7.0164	3.6689	-4.9033	-5.4753	8.9371	1.6711	6.5576	-0.30973	-3.3888	10.29	-8.0651	5.0006	-6.1326	4.6599	-5.8925	5.9532	-1.6164	-5.7556	3.3923	-5.3686
0033fwb50	white british	50	f	2239.59	22.028	118.17	30.225	-49.204	-3.5103	-21.425	16.331	5.7961	-17.931	-11.147	-18.099	-1.8445	-16.347	6.9373	-12.654	7.7171	4.2849	0.038615	16.848	-4.5965	4.1197	2.9344	-17.513	-7.087	2.311	9.4122	0.71456	7.6612	-11.854	-6.1863	-4.5366	8.8715	10.557	4.6964	3.5944	8.323	-6.5385	-2.3642	-12.372	-0.86458	3.126	14.157	3.0737	-5.4633	3.9332
0034fwb50	white british	50	f	2246.29	-10.585	22.158	107	-7.5093	51.347	-28.284	1.6476	10.456	34.481	8.0995	20.002	27.512	12.702	9.0524	27.765	-7.8664	14.711	7.7294	-2.4641	-1.5086	9.8383	-1.524	-15.659	-17.295	-1.8699	-4.7856	-9.1858	11.316	-17.633	0.39404	5.0651	-1.2225	9.746	-3.1754	8.6513	-0.487	-8.2939	-1.2021	-2.4558	-2.419	-8.154	4.8175	0.10335	-3.0373	-6.5754
0084fwb50	white british	50	f	2208.31	44.874	-25.449	79.577	27.233	-48.557	-44.596	-16.282	2.9743	17.404	-7.0456	-23.022	24.107	-0.23325	2.9565	3.8352	-13.386	11.907	-8.5735	-4.5249	-8.6153	-13.773	1.1742	-17.153	7.1137	0.26934	12.77	-3.5191	10.416	-13.141	2.0846	13.16	-8.8153	28.385	5.4405	2.915	2.8689	4.7057	6.0954	-1.056	12.168	1.0856	-2.3919	9.9369	-6.4859	-1.6137
0131mwb50	white british	50	m	2339.47	-132.05	12.152	-15.911	3.4093	71.844	21.453	6.1527	35.498	-6.3828	0.30087	22.615	-11.301	14.179	12.41	19.731	-4.1705	-8.5623	5.5861	10.94	25.89	21.834	5.5194	-16.428	18.979	15.091	7.9569	2.2592	18.96	-0.61594	23.585	-13.788	3.1784	4.1703	4.1007	12.07	0.89829	-2.2387	-2.9528	-6.452	6.328	0.65348	7.1111	-7.3544	2.5226	10.44
0168mwb50	white british	50	m	2301.89	-87.99	11.506	19.888	45.143	65.441	8.3567	6.1355	39.994	-59.8	5.9258	-4.9183	-19.149	2.3076	19.407	8.9865	31.409	7.372	13.41	1.32	5.9108	2.207	-4.4861	14.43	-6.5588	8.0591	5.8454	-4.3983	9.9251	12.415	3.5489	-7.7894	-7.9096	-1.341	-0.92193	-2.7578	3.8832	-4.7322	-5.4671	0.14703	10.211	-9.178	0.28377	-2.8555	-8.3807	8.5947
0900mwb50	white british	50	m	2301.42	-42.233	81.785	43.465	32.826	-3.9128	62.786	-54.336	18.127	19.973	-79.753	55.774	-40.082	-19.04	-7.584	-37.743	-2.9412	9.6975	5.8894	-37.295	-2.2075	-31.458	6.8014	10.163	-8.0619	14.803	4.2175	14.281	10.384	-19.739	5.978	-7.2104	-2.9326	11.111	-19.588	-15.283	15.56	-7.7173	-12.48	-4.537	8.1387	-10.524	-4.644	-4.0663	-16.641	9.7166
0901fwb50	white british	50	f	2269.28	-47.384	-71.719	80.948	-1.4078	-12.571	-9.503	-14.748	5.671	-11.778	-53.044	33.803	12.603	2.3301	-0.31097	26.545	-11.964	12.528	1.9117	-19.96	-14.556	-6.6001	19.51	-5.0758	-0.39599	7.2452	5.0896	3.3909	17.988	-23.391	-5.8704	7.6664	3.0886	1.0467	-8.3293	2.008	-2.3558	1.3414	2.2294	-12.407	9.976	4.9512	5.4397	-20.415	-14.485	14.489
1028mwb50	white british	50	m	2287.02	-30.571	152.74	-57.537	-42.639	21.958	-1.0794	27.901	11.478	-4.424	-12.689	-17.313	11.803	-0.60285	-23.413	16.139	-39.228	9.3462	14.827	-16.64	-13.432	6.0753	7.8059	1.9809	-5.3308	14.508	7.2244	0.78185	-0.16537	-4.6409	8.6769	1.4228	-12.571	-6.4144	12.652	8.8377	4.7886	4.8402	-1.0218	7.5782	-6.6944	-10.628	-5.3802	-5.5429	7.2075	3.8951
1048fwb50	white british	50	f	2274.09	-49.679	-11.028	-53.846	21.491	-48.076	-25.095	63.726	41.342	-6.5639	5.2425	-26.866	-19.17	30.128	4.0592	-4.8302	19.329	2.8479	12.953	16.081	-30.208	12.183	-7.2411	10.862	7.954	-0.69795	-7.8294	-6.4922	7.2716	-25.263	-4.6658	1.615	10.91	15.654	0.65391	4.7615	-1.185	-7.2795	6.3192	-5.5777	2.6774	6.4309	5.4553	14.883	-0.071498	5.4623
1049mwb50	white british	50	m	2369.22	-178.93	-116.49	-133.59	27.452	27.828	61.471	47.896	-32.425	25.883	-5.5326	-5.7592	1.5863	-7.2725	-15.964	24.64	-9.7423	4.9661	1.4758	0.040598	14.266	0.041382	7.6717	0.2558	1.6796	-15.537	-4.2007	-10.023	6.6677	-4.647	10.808	0.68023	-6.2828	-4.8364	4.4559	14.956	5.2184	-1.5593	-1.7036	-4.6728	-11.924	-15.627	-1.1559	7.3536	-11.226	-6.0668
1050mwb50	white british	50	m	2417.82	-202.9	0.33352	47.821	-32.835	-0.86838	33.751	40.742	-2.5894	18.714	-19.169	-28.025	-10.266	-33.024	-17.242	20.108	-8.8885	-4.0675	12.739	10.134	16.856	7.4735	-3.6764	12.358	-10.327	-14.755	-9.8818	9.2383	3.5078	6.4006	-0.82004	-1.151	-1.5422	-2.1608	18.25	3.7035	4.1118	2.3947	-3.0508	0.8283	7.3501	-8.8559	-1.471	6.6768	-0.64968	3.0044
1051fwb50	white british	50	f	2331.02	-96.445	4.3465	-1.8315	-8.2381	-6.2405	-97.569	-69.838	40.244	-47.255	-22.697	-5.373	-5.7308	-17.777	-21.075	4.1088	-24.657	19.759	-15.861	20.932	-5.8878	13.945	7.4818	-12.018	7.9964	15.948	-1.986	9.3145	-14.124	13.083	2.8978	-0.57609	28.261	-7.9808	-14.753	14.556	-22.79	-4.3776	-12.573	6.1742	12.416	-3.7815	-9.4304	17.164	-7.4971	-5.9903
1082mwb50	white british	50	m	2280.47	-61.079	-11.509	-30.675	-36.697	17.537	-5.6752	65.249	-28.909	9.5925	22.076	-15.511	2.9756	14.33	11.36	-12.959	-0.57369	2.4515	3.1603	0.31708	-4.8316	-8.3894	14.648	-4.0274	8.3608	-5.0086	6.4617	-12.392	-5.3927	1.9236	5.981	-6.7654	3.0208	8.7669	-6.5113	-11.343	-6.3151	2.5324	1.0496	-4.0389	5.2543	10.022	-2.4759	5.791	-0.24188	-1.9165
1091fwb50	white british	50	f	2276.09	-73.598	-79.896	-14.908	29.301	13.743	13.619	11.971	21.942	-39.49	5.2556	4.719	-20.469	-9.5009	-8.3239	-3.2045	-18.683	-9.3481	7.9327	14.403	6.7018	-1.2048	-10.904	-7.6802	8.2826	-8.9681	-0.95112	-1.89	-2.6714	-3.309	-12.889	-3.6692	1.0757	2.7557	4.7433	9.7216	-6.5847	-0.051909	-15.932	-2.2288	-3.3943	-8.7004	5.1247	0.9947	5.5725	6.1651
1127fwb50	white british	50	f	2283.62	-30.327	30.732	-3.4855	62.849	-21.17	15.07	-23.093	13.873	76.522	4.0954	13.015	7.3927	16.496	-5.8351	-52.052	-1.3906	-1.5785	11.387	-17.183	37.947	-19.867	32.287	15.874	16.282	13.703	2.8681	14.914	2.7227	-20.374	12.036	0.68203	7.3474	8.8576	-5.5581	-17.649	-6.1272	-10.063	-8.322	1.5077	-1.7372	-14.076	11.285	12.028	-3.5488	2.8076
1152fwb50	white british	50	f	2202.16	39.348	23.722	2.0837	17.762	-3.8299	36.591	10.445	1.1855	-2.7665	-34.954	-13.073	14.486	-12.579	-3.1756	24.893	9.0335	23.539	14.025	-9.6963	10.956	9.1778	-7.7256	-27.401	-3.6227	9.3707	17.51	5.6038	17.682	6.823	-11.276	15.268	8.3871	-3.8906	5.932	-3.495	-2.5847	9.5462	-17.356	-12.879	14.762	2.228	-5.1431	-3.0409	13.322	-3.4275
1204fwb50	white british	50	f	2209.1	42.002	44.294	35.53	-4.8216	0.51622	43.433	-19.966	13.335	-11.66	-4.3151	11.413	-25.977	-1.2804	48.197	0.22418	-13.018	21.334	-2.5667	11.578	2.3652	-15.007	24.557	-4.8171	1.142	-17.144	10.326	-2.2677	-5.9752	-21.611	14.894	12.64	-1.3064	6.8399	4.7674	-0.52445	5.4162	-8.2112	7.0867	-5.85	0.95876	-2.3278	7.0908	-4.8765	-2.9094	-6.7146
1217fwb50	white british	50	f	2250.73	-37.58	-52.267	-86.581	0.49404	81.35	1.3192	-41.993	-31.89	-19.524	41.625	2.2762	32.878	-23.271	-18.594	-13.961	0.98297	10.318	7.1079	28.474	11.444	-0.75316	42.737	-22.125	-16.572	-28.278	-7.5231	26.828	-21.319	-22.905	-4.8506	8.4793	-9.4465	-14.364	-1.2167	-15.256	-11.452	-13.971	10.485	-12.96	-5.3967	-2.1476	-32.358	2.2882	0.53671	13.754
1218fwb50	white british	50	f	2246.97	-38.396	-153.92	53.477	59.684	-45.208	39.936	13.042	30.277	-4.2113	-41.75	-13.37	21.503	31.522	23.413	-32.966	-9.0757	5.5341	11.116	4.875	5.1332	10.877	0.49782	12.359	1.9748	3.0355	16.075	3.4933	8.627	-1.5811	20.09	14.061	8.8301	6.3011	6.7818	-15.46	-11.756	7.2336	11.044	7.9496	-19.089	0.0073945	10.541	-11.622	-6.7638	-5.9647
1225fwb50	white british	50	f	2265.72	-23.633	17.411	42.351	-16.316	-11.156	-40.763	11.853	-2.2581	21.936	15.077	10.175	39.99	-11.362	-11.506	-2.8245	4.0739	26.129	-8.4323	-3.2202	2.1979	-21.079	-8.2174	7.4205	-0.11391	10.38	25.412	13.303	22.061	2.8161	16.245	2.1622	-25.516	-14.604	-15.338	1.3043	7.8536	12.627	4.4487	-5.3664	-10.565	4.3567	-1.5873	-15.036	21.093	-3.0702
1227mwb50	white british	50	m	2357.18	-159.65	-83.776	65.329	58.261	45.758	38.497	36.691	-7.1191	-33.84	-34.177	17.528	58.973	38.429	32.701	-25.067	2.6191	-5.2154	-9.8598	-16.776	-11.109	5.3156	-8.9788	-2.2443	-2.6582	19.533	-14.521	7.2007	7.3166	3.289	12.393	-15.038	-9.7182	-1.5652	9.4027	5.1307	-10.804	8.8671	7.5418	1.3121	-3.1429	-2.0637	8.4495	-1.1153	-11.95	6.6761
1242fwb50	white british	50	f	2150.2	80.613	8.512	103.3	-10.027	87.312	-2.1324	-8.0783	23.388	5.3565	-15.725	-19.314	-12.35	-0.23338	10.116	-2.1067	-29.013	23.938	17.468	-23.817	5.187	4.9362	-0.025709	-5.7026	-9.2209	-11.39	4.9964	4.1668	6.5343	5.3524	4.614	-2.0851	-3.7493	7.9683	-0.082785	13.247	-1.6059	3.7039	1.752	-1.4372	-6.3447	-11.46	1.702	0.71244	-5.5877	-2.0008
1249fwb50	white british	50	f	2195.63	295.2	207.99	384.25	434.34	-18.354	-16.535	95.36	-155.51	-89.534	72.103	-34.32	-14.794	-35.107	-74.228	16.966	-24.69	-18.419	46.019	28.603	-12.987	-24.031	18.538	-8.0737	8.7091	2.2115	0.45381	-24.124	-2.293	-0.39107	-2.639	-17.11	18.16	-17.511	-11.589	-6.4282	-1.3476	-2.909	3.998	-0.10926	-0.061621	-0.51862	0.59569	-10.267	-6.7607	-2.2131
1254mwb50	white british	50	m	2379.77	-165.74	-49.773	-123.45	22.07	-22.557	8.091	15.58	-15.357	14.726	4.5692	24.369	7.6268	11.225	-21.448	17.236	-48.176	-13.209	-13.481	18.868	-21.241	-3.1861	5.9066	-7.9913	14.655	1.3613	-1.576	4.9923	-8.0733	2.8383	-7.384	-5.541	-5.0101	-11.209	-0.31982	-0.59146	9.1537	-3.2817	-5.8142	5.6922	-6.7782	0.075552	-3.2745	1.0757	-2.211	1.7287
1302fwb50	white british	50	f	2194.43	27.095	17.455	-29.946	27.703	13.283	-12.532	47.707	48.793	-49.197	-39.416	-9.8725	66.783	24.285	32.608	13.042	-10.028	6.0179	0.79179	11.875	31.593	-4.7631	6.2581	0.9	-3.7872	-0.87517	-6.5274	-11.357	10.623	-0.58626	-5.4449	4.1149	-11.34	-15.364	2.7867	6.3561	-1.8417	-4.097	2.0383	-2.9023	0.41233	5.9038	5.4736	2.0251	-5.7404	-4.8799
1344fwb50	white british	50	f	2278.51	-35.346	49.943	65.744	-6.4666	28.427	-28.725	37.904	-8.9754	-31.358	1.8665	57.981	-5.8341	6.0574	-5.3713	30.193	-1.3755	9.079	-2.1524	-24.227	20.723	0.96512	-8.3135	-24.929	-19.404	-7.0369	6.5499	5.8847	4.1296	7.7366	-4.3869	16.238	-14.646	-3.4216	-0.5304	-17.911	-3.0074	1.0356	-10.248	1.2747	-15.834	-0.5292	1.3736	11.929	6.7356	0.88788
1347mwb50	white british	50	m	2398.46	-177.35	22.526	14.098	-24.654	26.891	-39.16	-33.339	21.259	-1.3256	-0.89419	-19.952	21.342	13.045	10.497	46.706	-19.836	15.053	29.602	5.6176	13.404	5.1824	2.2382	20.011	11.12	4.0851	4.4507	-5.3911	0.87996	14.022	-0.34361	-2.4952	-3.9628	2.3435	-9.925	1.1633	-0.34725	-19.474	-12.503	-5.1934	-6.2224	-6.8674	-0.64917	-0.61436	0.25317	2.2469
1349fwb50	white british	50	f	2270.77	-47.094	-74.143	-49.087	2.8	-20.235	70.994	-25.093	-13.752	41.756	31.198	-68.145	64.798	-11.753	-33.275	19.309	-17.941	16.289	-11.866	-7.2432	26.38	1.8884	-1.9093	4.906	18.214	-1.8174	-1.6799	-6.7555	-8.2902	-13.697	-12.844	2.2508	13.224	1.1323	2.9969	-1.682	3.0941	-8.2603	-2.0566	-14.402	-8.5046	4.0898	-4.7463	-4.5344	-4.2044	2.6024
1350fwb50	white british	50	f	2143.17	61.056	-85.758	-30.962	-1.9011	53.699	-32.285	-6.7497	20.422	5.8575	-27.337	43.852	22.452	-5.7088	-19.391	3.4331	-18.369	13.032	7.3396	38.922	0.9902	1.6933	10.07	-6.928	-9.933	13.31	-17.39	16.615	-25.702	-0.026106	-10.651	-1.9691	-15.406	1.7914	3.2541	-28.794	-15.146	-4.3762	0.28025	-16.786	4.8563	2.3107	-12.42	12.87	20.862	-5.4584
1355mwb50	white british	50	m	2327.6	-109.08	-35.913	6.5233	-5.2184	-23.278	-9.027	9.8768	-2.4309	-59.776	-13.912	-15.194	2.7643	31.392	2.8782	-10.202	-1.9302	-6.9375	19.476	-12.612	4.9186	-9.4435	19.836	8.1501	-12.45	-10.244	2.9223	6.2177	0.97834	6.0754	-22.066	-0.016402	6.9503	13.512	-0.86824	-2.5204	5.8548	-10.452	-2.2716	-12.395	-9.091	0.095385	-1.3445	4.5881	-4.0939	4.879
1356mwb50	white british	50	m	2325.19	-109.14	-2.2478	17.328	-8.4689	51.585	43.652	40.128	-44.536	-26.135	-3.4395	39.6	-11.699	8.3625	9.665	-31.356	32.177	-4.5269	38.204	-9.9774	-3.4862	-3.5447	4.5698	-2.2656	-26.248	9.912	0.13066	-3.4889	10.202	6.7535	-11.263	0.52609	-13.461	8.1187	-3.6528	3.4346	-0.071486	-8.084	2.7543	-7.5542	-1.2953	-2.6149	-0.13913	6.1543	0.98732	3.0269
1357mwb50	white british	50	m	2368.29	-155.32	-34.008	99.943	-31.89	25.971	38.125	7.7131	0.76919	30.797	-1.8195	-19.26	2.847	-4.2407	-15.087	-8.7142	4.9057	3.1989	6.8011	-7.6833	2.6176	-16.554	4.6075	11.526	12.443	-3.5885	8.5849	-5.3698	-9.4236	16.898	6.7471	-10.478	-14.071	-8.9594	0.39639	13.553	-4.3688	17.114	-20.728	1.8522	15.095	-7.8493	-0.67974	7.2709	-8.2519	0.88442
1358mwb50	white british	50	m	2308.58	-103.3	-53.368	-40.446	-19.333	60.407	44.604	-3.3898	-33.386	12.347	25.451	1.6826	16.017	-7.0675	-6.3769	6.0242	-23.641	9.6882	3.7946	-15.071	2.1636	-13.712	6.5782	-14.219	-2.1648	-1.4414	2.8201	-33.952	-1.9161	1.0462	-4.2569	0.6644	-11.203	-1.9472	0.019388	-3.4625	-2.0822	4.3934	8.5715	14.499	6.937	-17.146	1.9983	0.37418	-1.7515	-4.3644
1359mwb50	white british	50	m	2400.35	-159.65	20.698	58.679	-52.251	-26.039	-39.04	-42.088	-31.119	-37.124	-3.8717	7.3495	-5.5852	-2.2696	12.562	-11.227	1.7287	-13.04	19.422	0.65012	-11.088	-1.8119	-4.3969	2.2625	5.909	-1.1224	-6.9624	-7.086	5.4549	15.383	12.972	-5.5123	-9.4688	0.45878	-5.0213	-5.8885	2.6048	-2.5756	0.030164	9.3033	5.9671	5.0144	-6.8307	11.975	-0.072816	0.33172
1369fwb50	white british	50	f	2275.15	-13.916	92.005	-51.565	24.394	-24.919	-14.153	28.577	6.693	45.803	-7.9884	38.437	-2.6258	-40.597	-2.5048	12.988	6.3145	-11.872	0.39966	-0.92515	-1.1313	2.0587	-23.14	-34.734	4.401	5.5981	-26.899	5.3852	-16.316	15.399	21.274	7.5842	3.8951	26.14	-0.6229	-0.093785	-5.9862	7.2401	-14.123	-7.3805	12.799	-23.491	-1.9706	-12.342	5.3245	-4.4104
1390mwb50	white british	50	m	2399.23	-199.21	35.792	-87.095	-29.677	76.822	-3.6685	53.538	21.708	10.439	-7.1772	2.958	-2.8421	-22.043	-6.2048	21.119	23.556	1.8045	17.845	0.67123	-0.60214	-0.85343	11.987	0.88984	0.078318	10.661	0.82392	-10.475	-5.0135	3.9424	12.995	5.7766	-7.7689	0.92667	-17.836	-1.5529	-0.21361	2.5299	2.6968	-3.6344	5.1709	-0.53404	3.9066	-3.832	-4.6513	-6.0435
1391mwb50	white british	50	m	2358.39	-117.53	122.23	18.825	29.64	34.59	8.9565	34.062	43.016	37.093	-33.558	-21.679	-30.261	-6.9641	4.4397	-6.7231	-19.343	8.7153	14.439	11.731	-40.048	-4.4997	-7.2104	-7.0041	17.801	4.579	-1.5171	-9.3342	-0.39399	7.9612	13.18	-5.6192	-4.93	23.351	5.3249	-4.9732	-9.6795	4.6565	-14.936	0.53527	2.2551	-18.072	-2.8653	5.0566	3.5531	0.61252
1410fwb50	white british	50	f	2217.92	30.377	96.79	-64.99	54.737	36.951	16.197	50.121	21.049	6.375	3.4216	25.543	28.128	-3.0701	14.09	27.955	5.1841	11.172	12.096	-18.1	19.404	-14.067	-4.7155	-1.3812	-4.5013	17.559	-1.5932	-0.30903	10.555	-22.487	2.2279	-17.244	13.494	1.4277	6.5594	5.8937	-5.0663	-1.5032	3.6294	-7.1481	-7.24	1.1642	9.9548	5.2747	3.9902	10.814
1428fwb50	white british	50	f	2129.25	95.741	-45.974	-34.241	-10.275	51.048	-51.868	-64.01	8.214	-3.7218	-21.499	-9.1241	34.888	16.759	4.1014	34.18	-11.506	-2.5774	1.1892	10.208	12.419	19.011	-3.5349	-15.167	16.721	13.055	1.2329	-19.549	1.097	-6.1504	10.277	-0.59082	3.0197	10.02	-9.3276	-9.2816	-4.7184	-1.5661	-9.8831	-3.0955	-5.6717	-0.22153	-4.5239	-5.6604	-9.5938	-3.121
1478fwb50	white british	50	f	2224.26	38.619	121.47	-24.405	-16.986	8.5038	61.974	-25.585	10.312	-17.567	-35.074	5.2121	50.337	-11.962	-0.60193	22.245	-22.878	6.0289	26.144	-15.082	12.358	-11.317	-6.6681	7.4267	0.41283	-1.9768	-13.715	10.311	-14.275	11.016	6.5395	-10.993	-12.862	3.2941	-5.6687	-2.753	-5.9542	5.9736	-11.894	6.3611	12.396	6.5943	7.8438	-10.988	20.261	8.9525
1488fwb50	white british	50	f	2203.1	34.665	75.971	42.198	-4.6509	74.38	-26.263	2.0659	38.043	-4.5161	-31.954	-4.8695	-20.291	-22.457	19.265	-7.5185	-1.1885	-3.9934	11.081	-7.6371	10.698	6.4063	6.2986	5.4904	-0.42037	0.21285	17.088	1.9415	-11.39	0.51397	-11.11	-2.0764	-5.1416	8.2214	-15.707	-8.951	-3.5232	-5.5704	-2.1943	13.483	-1.7674	-1.6472	-3.5996	4.4179	2.7319	-13.394
1491mwb50	white british	50	m	2284.58	-69.054	-34.057	87.223	-30.172	27.909	44.807	66.289	-17.769	20.653	-2.3006	2.7214	-8.531	-2.1767	2.2289	-14.864	-27.198	-7.6495	-11.811	8.4572	13.66	-12.754	8.631	1.968	5.9787	-4.4039	0.040654	-5.1015	-0.18761	1.1813	-7.8271	14.465	0.532	3.0493	5.6996	-0.8091	3.2565	4.1187	-2.4048	3.3532	-5.9492	6.9911	3.0383	6.5938	-2.8543	8.2136
1494fwb50	white british	50	f	2229.13	19.453	113.61	-45.9	30.367	61.941	-0.5992	4.4072	-8.7466	-26.825	-32.315	-7.0631	8.6606	11.006	1.3513	-4.882	-1.8042	-1.2625	10.964	1.6256	-13.202	-4.0232	-1.3016	-3.833	1.8533	-1.7586	-17.293	-9.723	4.7127	-1.1722	0.13767	3.6746	-2.0351	8.4336	-4.2914	8.4815	5.3836	0.95598	-2.8053	-0.49627	-9.5517	1.4276	-2.8196	-8.3175	14.282	16.771
1497fwb50	white british	50	f	2182.6	58.607	82.689	-10.522	10.961	32.495	35.873	42.556	33.302	-47.304	-11.776	-6.4621	6.6058	-16.637	14.427	-20.459	10.522	15.281	-20.616	9.0734	-14.196	17.229	8.6041	-6.5738	-1.9033	-4.4043	0.48538	12.813	-10.759	-7.4117	-5.2759	-6.3427	-4.9765	-6.7972	9.8877	1.2523	0.42294	4.7917	3.3978	8.2385	-6.9923	1.5475	3.4731	4.1554	-3.1371	-2.4514
1498mwb50	white british	50	m	2444.49	-211.03	52.789	-98.897	44.563	-31.332	49.521	-18.358	28.537	-9.4813	22.797	-43.529	3.3004	-10.539	-2.3382	9.4617	29.229	23.465	3.9732	-5.8778	-8.9255	-1.825	-15.639	1.4897	40.176	-1.1801	0.82518	3.6101	9.082	-12.938	-1.714	-5.9805	7.6918	6.0788	11.024	11.213	-4.5694	-4.3606	5.0246	-13.146	-7.6479	-7.1104	-2.4876	-1.7396	-4.4833	-0.061342
1499fwb50	white british	50	f	2217.78	17.805	3.7054	-64.646	43.071	21.689	6.3555	-15.356	-3.9944	-18.667	37.591	19.313	49.002	21.006	14.838	29.476	2.1288	11.895	1.1004	1.6788	-6.5089	-7.6227	-13.41	-1.023	-0.99892	-5.6238	-8.0791	1.2156	5.1255	3.1472	-3.7294	10.695	3.9395	14.555	9.6398	14.006	20.769	0.51024	9.6912	14.581	7.5948	-3.8657	-5.8677	1.2345	5.6898	4.5374
1500fwb50	white british	50	f	2290.35	-38.666	106.31	32.966	7.2662	17.313	-42.371	15.024	23.231	-32.498	1.8378	36.48	13.034	4.5126	-25.414	-8.5258	-16.722	17.467	-2.0092	18.043	-29.821	9.4653	-15.577	-2.0114	-17.867	24.313	-5.9279	7.1577	10.422	2.1207	-19.774	18.322	10.769	3.5181	-27.968	17.718	5.1704	-1.4712	4.2051	2.613	15.506	-2.2588	-11.904	2.9907	1.5559	-8.3233
1508mwb50	white british	50	m	2458.68	-227.7	69.456	-64.306	-23.42	-17.696	43.806	-0.056536	-2.0615	2.526	13.399	-0.59939	-11.324	-14.099	-14.836	14.666	5.4498	1.8175	7.4475	11.681	-8.8809	6.4563	12.453	6.3655	-20.314	7.842	-8.3515	-18.576	9.6164	-11.881	-1.9828	-4.54	-4.474	-6.2988	-2.983	4.6365	6.1039	-3.2969	14.561	3.8176	1.2051	4.9334	-8.663	-7.0187	-0.83604	0.84955
1510fwb50	white british	50	f	2223.98	3.5528	-36.767	-17.797	-6.5197	14.258	-50.929	-2.0535	-27.62	44.67	-42.145	24.387	-9.3038	-4.0648	-16.825	-20.952	-4.6154	14.666	13.66	17.949	-11.718	-5.674	18.088	8.5198	-14.618	-11.598	-17.989	9.2899	-3.0819	0.48277	-10.233	7.4547	-4.0791	-25.369	2.6837	-1.4613	0.4176	-6.7137	18.933	-7.8308	-5.3116	-8.6711	0.99862	-1.742	-8.3633	1.6868
1516fwb50	white british	50	f	2346.82	-113.16	6.6366	-133.92	25.804	-65.023	34.648	16.575	14.058	22.244	-20.295	25.138	-8.4787	24.227	-10.168	1.8565	-13.294	-15.541	13.29	14.724	-6.5607	-4.75	-4.4994	12.361	2.0666	-2.6867	12.94	-0.16832	2.164	1.0787	8.1658	9.4476	22.432	20.454	-2.056	13.973	17.063	1.8787	-13.836	5.9872	-1.4051	-10.402	7.548	-3.6831	7.8115	8.2795
1518mwb50	white british	50	m	2481.51	-262.8	-37.613	-60.754	60.073	-16.13	-30.853	-3.3339	-19.864	-8.9772	17.829	-25.324	-21.395	5.383	0.32945	17.355	-27.28	22.903	-0.5963	-32.232	-1.7653	-5.9308	14.657	6.2326	4.8492	-12.096	4.2049	-7.4387	-3.9072	-1.767	0.45392	0.18061	-15.954	3.5084	-8.5835	6.5051	-2.4935	-2.901	10.915	10.245	-8.7486	-5.1998	2.6111	3.2223	14.406	-2.7745
1519fwb50	white british	50	f	2289.74	-57.044	56.84	-2.6135	-31.512	38.659	24.876	27.719	-19.785	-30.33	25.632	28.208	32.678	7.7543	26.069	-18.171	-5.0193	3.9677	15.879	-0.26298	-24.635	28.027	-4.744	1.6397	1.202	-5.3911	-17.863	7.971	1.513	-16.357	-1.7446	-0.68654	-7.2266	-2.6252	-8.3396	-0.25034	6.7504	-9.2205	-0.63649	-0.42196	-6.0575	-5.0825	5.9849	0.59709	-13.291	-7.494
0005mwb19	white british	13-19	m	2117.03	152.83	59.365	-10.024	-24.819	-3.3391	26.379	-4.8576	-49.867	8.4538	-10.955	-43.357	-3.9317	14.449	16.133	-20.847	11.175	-7.6068	-5.6698	13.653	17.625	-16.949	4.1162	-0.23215	3.2718	-2.8343	-9.7835	-6.6447	-9.5916	-0.39402	4.4778	8.662	12.027	4.3461	1.3007	-9.9302	1.5655	-4.8998	4.2162	0.43066	3.949	2.9576	1.9856	-2.2206	4.6806	-0.18043
0007fwb19	white british	13-19	f	2132.04	132.34	81.529	7.4697	-26.124	-15.929	44.645	5.5187	16.743	2.2975	-15.84	-9.8388	2.7627	-15.042	-11.014	46.748	23.362	-0.39221	3.8697	7.4111	-16.137	1.1664	-0.038506	22.439	-9.595	1.0562	-4.1347	-8.7952	-22.136	-1.8814	2.5819	1.0309	5.8732	0.87949	5.7449	-5.3342	-8.0861	-9.4273	-7.6081	2.7053	1.0271	-3.2915	-1.8953	6.4599	-2.3534	4.2479
0016mwb19	white british	13-19	m	2143.67	100.07	3.4488	-60.049	-11.873	1.8297	-0.16946	-28.724	9.3537	-62.745	38.164	-28.088	4.338	25.198	-26.526	-28.382	-2.4591	-10.943	15.291	-26.091	-1.7388	-6.4006	-0.067406	19.218	12.289	4.769	-5.454	13.208	1.955	11.721	3.127	-4.3396	-20.286	14.398	-11.004	-1.6772	4.5985	0.43079	-7.82	-7.5348	-6.5684	-7.6119	-2.0501	-6.5683	-7.3764	1.3213
0017mwb19	white british	13-19	m	2192.02	71.19	7.3984	37.67	-14.46	-45.721	9.9199	-19.45	-14.043	-20.173	37.952	-3.6563	-12.837	1.6644	15.954	14.769	-1.0953	19.164	0.94947	-18.595	5.2696	4.5357	-2.8973	5.6093	4.2631	1.7495	12.581	2.1055	4.8845	19.158	-10.607	-4.4367	-7.932	10.943	5.0915	0.33517	-9.314	-1.8317	1.3792	1.4905	-5.8191	-8.0742	-5.9706	-1.441	-10.043	-2.4858
0019mwb19	white british	13-19	m	2106.3	133.54	-49.825	57.228	-75.205	8.8605	-53.596	31.941	-5.4307	50.768	57.769	13.994	18.935	-3.2997	-0.68384	21.884	-19.516	10.23	3.5177	-8.2117	1.8605	10.192	-0.75183	3.2672	-7.9297	-2.5207	5.9559	8.63	6.8459	4.279	-4.6775	-15.85	-15.387	-4.9859	-0.40614	10.04	-12.116	-2.6344	-7.6465	-3.2713	-6.081	-9.9928	2.8364	-5.5597	-2.5801	-4.5838
0021fwb19	white british	13-19	f	2194.86	27.05	17.389	-29.823	27.702	13.372	-12.454	47.931	48.818	-49.366	-39.426	-9.6133	66.768	24.193	32.924	13.503	-9.6261	6.39	0.72608	11.83	31.684	-4.3126	7.0823	1.7954	-3.1061	0.91979	-5.4713	-10.843	11.293	0.69597	-4.34	5.6018	-8.4398	-14.468	5.6232	8.4479	3.462	-2.9439	3.421	-1.2379	1.5672	9.7602	5.611	4.1163	-5.8097	-3.2576
0022mwb19	white british	13-19	m	2202.74	74.95	119.33	-44.628	-27.931	24.865	-10.441	-26.722	-80.59	19.769	-40.761	0.99492	26.059	20.83	-31.194	24.951	13.931	-5.778	8.364	-10.244	-8.4764	-3.1532	6.4081	4.0882	9.1178	-11.926	1.4367	-2.8989	-3.7678	5.6054	-8.5906	-5.1208	4.0411	7.3821	-1.7348	7.4374	-2.684	-2.5138	-5.1558	-8.0001	-3.6739	2.1044	-0.4634	2.7235	8.0767	0.97361
0026fwb19	white british	13-19	f	2168.86	91.016	-6.0405	-11.53	37.516	-11.861	-13.848	-59.671	-38.013	5.1938	-10.327	16.655	-12.87	9.763	10.198	-12.236	13.153	12.991	-7.3625	10.82	16.814	-0.11785	15.447	12.825	1.9365	-10.027	-3.67	-2.9956	-9.1539	12.731	6.1663	-5.2934	-7.4652	-3.3034	16.741	-1.1129	-10.397	9.3431	-4.4897	5.6286	-12.674	1.3602	0.70282	1.3772	6.2078	-0.36543
0027fwb19	white british	13-19	f	2137.29	102.12	-101.5	-9.5745	8.1931	-29.071	8.8395	-37.295	-30.007	-48.671	13.513	16.795	-4.8748	8.899	0.96172	-11.817	-3.8205	16.327	-1.9533	-15.47	4.1093	13.644	7.3326	-11.635	3.3026	-3.9333	13.913	11.182	-28.4	8.558	19.327	10.385	-3.5411	-9.5818	6.1724	-6.8335	5.5371	17.485	3.474	-1.8526	-0.67899	-0.47606	19.3	6.7733	-7.3199	-7.302
0029fwb19	white british	13-19	f	2024.15	209.69	-86.001	-46.875	24.262	-4.9993	-12.25	6.9899	-2.2677	-36.013	6.7339	1.3715	6.7002	12.06	6.8011	-4.51	-12.045	12.865	-6.697	-8.3542	7.2098	17.734	-0.095943	-16.04	-6.5633	-3.711	5.7242	-9.8001	9.8034	3.3572	-6.3688	-8.1834	8.7447	2.3311	12.98	-3.2389	6.6449	5.0783	-3.0358	5.5891	-5.7035	1.985	10.918	-4.174	0.98048	-7.0735
0032fwb19	white british	13-19	f	2177.2	74.959	38.344	-37.016	15.649	19.577	-14.727	-21.25	-33.453	-13.682	2.1944	31.481	6.3879	-20.943	-1.0889	-18.862	22.128	9.9211	3.7659	16.311	-3.8361	-7.9209	3.4281	-6.4967	15.92	-2.163	5.1498	-8.3933	-7.8845	-5.8941	-7.4259	1.9471	-13.116	-1.3582	1.9187	7.3644	-3.5777	13.452	9.9857	2.0902	6.2314	-7.8792	-2.1483	10.617	-1.019	-2.7143
0035mwb19	white british	13-19	m	2145.16	106.37	6.4734	52.299	-41.826	-9.3891	-4.3386	1.0493	-27.185	4.8569	-19.677	8.3264	14.599	6.5973	4.9487	28.357	4.3693	-17.757	-7.4039	18.934	14.583	-5.5342	11.766	3.1703	2.8977	2.8221	4.5922	-15.97	-5.5345	0.070902	-0.17506	-1.5246	2.9745	-3.7207	-5.8838	5.9661	-4.9474	-1.8416	1.6023	-7.6956	0.09377	-3.0174	7.8823	6.7144	-6.6427	-0.94876
0037mwb19	white british	13-19	m	2211.45	44.974	85.634	1.3528	-32.014	60.805	-52.483	-16.977	-34.968	30.267	6.3105	-7.853	5.5376	-1.7859	14.595	23.439	9.5157	9.329	0.96502	1.7676	-10.566	-4.6605	4.1349	6.8253	16.597	3.9631	9.4216	-8.0149	14.999	7.5299	-6.9437	-2.8466	7.1725	-3.199	-0.83184	7.5977	0.092924	5.5029	2.721	-6.2639	-2.6895	-6.8557	2.1641	-3.4527	1.3919	6.6552
0040mwb19	white british	13-19	m	2202.46	72.458	92.398	80.833	-46.705	28.52	-72.403	-44.215	-25.724	8.8515	1.3665	-1.4197	10.622	52.332	3.9631	13.023	-2.6929	-24.672	-19.386	9.5265	2.2984	-4.601	9.6083	2.6443	3.2206	13.577	16.927	-1.347	-5.5905	5.7528	2.5634	-5.7331	0.76535	0.49747	5.2506	7.0186	-9.8116	-6.9273	1.5313	-0.33792	-1.1174	-8.7889	2.2657	-1.2473	3.1303	7.1468
0042mwb19	white british	13-19	m	2220.49	19.52	10.864	55.244	-25.933	31.305	-23.906	-49.415	25.095	-12.108	28.016	-31.915	-47.799	15.184	-10.312	10.458	7.5632	9.2533	11.609	-7.1386	6.3887	-4.3231	-12.607	20.114	2.8893	-19.745	-4.9072	-6.0784	3.7884	6.4293	-2.4255	-1.7041	-4.5919	14.467	-4.2182	-4.8158	2.4132	-3.0716	-4.2907	-7.3516	-6.4307	11.651	3.7717	6.7419	7.6475	4.3558
0043fwb19	white british	13-19	f	2201.24	30.746	-74.626	8.5421	-19.719	-57.239	-21.147	45.31	-11.173	8.1961	26.734	-23.239	16.599	-27.468	-19.994	-17.843	15.659	-8.1185	-17.695	-7.5032	8.2359	-21.897	9.2689	1.7489	17.614	-9.4366	2.3737	15.338	10.933	8.5514	0.18441	5.5863	2.6623	5.1192	7.7788	-9.3916	-2.7945	-5.4076	6.4939	1.5868	-0.42591	-7.7901	4.0387	4.0344	-4.4792	-3.8123
0044mwb19	white british	13-19	m	2302.62	3.6194	198.09	-56.815	11.018	-35.516	-71.721	-5.5771	-29.76	12.068	22.714	-32.744	-25.262	30.3	4.4913	9.554	3.6172	9.4001	3.0375	-4.9403	11.17	-4.1044	1.8155	-1.7359	3.4224	-10.103	8.6481	-3.891	4.8742	-3.1578	-7.1841	-12.241	-2.4056	-1.4259	1.5913	-2.9711	-2.7943	-0.89195	-1.724	-2.0454	-2.9949	2.0728	-3.636	-8.7955	6.3229	-10.586
0046mwb19	white british	13-19	m	2246.55	14.421	122.78	70.627	-55.813	10.217	-34.576	16.792	31.247	-1.9453	0.2028	-23.322	-1.971	-30.229	2.6543	-14.782	3.9034	3.0409	-2.7638	17.971	-4.5888	6.8702	4.199	-14.306	-0.81289	5.3433	11.313	8.7235	7.6012	-15.064	-4.8967	-8.1642	7.388	12.729	4.4805	9.5811	2.5339	-6.3351	-5.349	-5.7952	-6.8838	-6.4408	13.166	-1.0406	-12.356	2.1054
0047fwb19	white british	13-19	f	2237.47	-13.261	-68.373	4.4591	24.135	67.032	-46.415	-88.972	-14.875	-6.9633	20.136	8.3824	-8.4584	0.21268	-1.9357	15.434	6.5595	11.008	9.0632	7.6053	16.659	0.71736	1.2046	-11.617	29.75	-6.9499	10.162	6.1691	4.2799	-3.1816	1.6635	0.55438	-7.7087	3.7179	7.1622	0.023637	14.984	5.5397	-6.4578	1.888	-4.1199	2.408	-1.0017	5.275	-12.371	-5.824
0049mwb19	white british	13-19	m	2265.78	-12.662	42.784	93.196	-29.922	2.588	35.655	-14.053	-18.328	45.723	-4.0274	-27.097	-2.1936	21.148	15.918	2.8116	-0.92045	-1.2411	8.0061	9.3748	20.828	-0.68902	-0.80719	-3.6644	10.863	12.041	-3.3393	-0.6454	7.3916	2.4482	-3.0406	15.401	3.5183	4.3799	2.8986	-1.5469	-13.986	-9.5712	4.8392	-3.2734	-0.93641	6.2345	-6.6257	3.9174	-8.1248	-0.70672
0050fwb19	white british	13-19	f	2253.05	-8.4096	46.467	-91.291	18.986	26.484	-22.689	11.447	-16.131	40.911	-0.090817	70.604	-15.982	-36.051	-10.804	0.087257	2.773	-15.083	-14.17	0.41092	8.6797	2.7026	-10.269	11.541	18.692	21.28	9.5432	23.522	4.8104	-22.97	-13.806	-9.3188	3.1416	-17.961	-0.81475	-0.16982	-23.13	12.865	8.1854	-14.522	-5.6753	-2.4775	-19.474	7.3012	-16.797	2.2908
0053fwb19	white british	13-19	f	2164.76	88.258	74.138	18.564	20.061	64.676	40.727	-17.329	3.0551	18.992	-8.5038	-23.883	-26.99	-23.739	27.669	-25.079	-22.156	-22.083	-0.62427	1.1126	1.9856	-17.382	-26.672	-7.3202	5.0087	7.3523	10.263	5.4286	-5.5098	-8.2516	-15.047	-1.933	-11.771	14.169	20.898	14.006	10.362	-15.054	14.589	6.2966	10.063	5.0177	-19.655	-13.306	-4.3314	-5.7891
0061mwb19	white british	13-19	m	2290.69	-36.611	99.89	-46.958	24.054	-9.416	7.068	22.643	21.768	-34.782	22.898	-8.3425	-29.488	37.588	11.219	-8.0737	8.8028	13.029	-7.2014	-4.9749	3.7544	-2.6672	1.7542	9.0521	-5.878	-0.22026	8.102	4.9843	6.9898	4.4994	-9.5519	-11.632	-5.9233	-0.3644	-0.77962	4.9049	2.8365	10.161	13.724	-0.52423	-3.8459	1.2702	0.20008	-5.1275	2.4293	2.527
0062fwb19	white british	13-19	f	2100.23	118.76	-109.09	20.792	-48.91	-13.969	-42.092	32.039	5.6616	-14.165	2.5469	-28.061	17.635	-26.051	-5.9988	-9.8403	23.44	-0.064145	-14.149	-12.953	-8.4703	-6.7007	8.743	-5.0441	-8.0213	15.229	11.759	-0.94227	4.2877	12.048	2.2402	-7.1677	-3.1744	4.7255	-12.14	6.4648	12.668	6.3334	11.568	9.7809	4.0926	4.7195	1.547	10.891	-8.1183	1.0873
0065fwb29	white british	20-29	f	2231.77	67.231	168.6	-78.36	28.848	21.577	4.3418	-61.191	-42.489	1.8473	28.183	26.943	16.073	-25.223	4.2481	-8.2444	-17.349	-50.962	-8.5027	-18.5	-10.283	-1.5981	14.396	-2.8546	10.799	3.5545	-10.958	25.018	13.635	-1.0721	-6.6689	6.3187	6.8899	-11.271	3.9652	4.0586	3.0144	8.8378	17.48	-8.513	12.558	17.102	26.112	7.836	6.0015	-9.548
0066mwb29	white british	20-29	m	2360.46	-110.95	97.1	-34.701	-12.84	-4.8371	19.372	-26.589	6.0054	-27.046	10.581	-46.848	-26.884	-8.2282	-34.726	22.827	-19.046	-1.1749	-4.9873	2.6243	2.9459	8.886	15.113	-2.9475	19.33	-6.6767	2.4776	-3.1268	-2.8085	-4.557	-11.37	-1.2244	19.177	7.9178	6.9715	2.8433	8.1311	2.8473	6.2356	-5.0205	-4.4187	3.8237	-6.3814	-2.7002	6.0118	-6.2112
0073fwb29	white british	20-29	f	2223.76	47.72	93.382	23.1	1.7154	8.6509	12.947	-65.302	-8.9528	3.3103	-5.9122	4.4497	26.173	-55.025	7.7662	19.905	6.8268	-16.742	-2.0199	-1.3597	17.105	-5.181	-11.131	10.524	-14.889	7.8741	-7.6371	25.3	5.4967	-0.076644	-2.9787	-20.55	7.5466	-6.1778	20.749	-12.869	-10.737	10.301	12.843	-10.986	-15.804	2.1032	11.294	-0.66012	3.1233	6.6115
0077mwb29	white british	20-29	m	2411.51	-179.78	28.906	-14.307	-23.979	9.7961	-47.793	-49.891	-25.088	-13.158	4.952	-7.7873	10.137	30.691	-10.949	10.258	-2.5666	-17.127	-26.823	6.1617	5.9751	-15.491	5.403	11.416	-7.0558	17.602	-1.1817	-12.59	-4.2286	4.4786	-11.917	3.1278	10.837	5.4366	-5.3603	-6.641	8.1035	-6.9647	-1.1817	4.8309	-8.4562	1.6824	-10.311	-1.1943	-4.2559	8.5542
0080fwb29	white british	20-29	f	2276.31	-61.483	-57.968	84.848	-51.064	32.087	-48.71	8.0824	13.029	15.597	39.825	-35.581	-9.2237	-6.3103	-28.819	-2.2723	-12.875	-7.3402	-1.1109	-5.6042	-1.4713	-2.9435	-3.1542	1.0985	10.31	-2.1154	-8.4988	4.8364	5.0114	10.175	9.5792	9.3803	8.6584	-0.93067	4.2711	-6.7813	8.2374	-0.63691	1.989	-10.861	2.228	-2.1735	-3.417	-5.1022	-3.5073	10.342
0083mwb29	white british	20-29	m	2257.89	-31.842	25.25	62.723	-47.919	94.763	11.368	-9.4953	-27.609	-3.5409	28.555	2.9716	2.5655	2.9952	9.5708	-5.7344	19.6	-3.307	1.9173	-6.3966	-13.504	-3.0501	13.817	9.6523	2.8734	17.793	6.5823	-2.6932	-1.9675	-7.7293	-10.664	17.258	4.7239	-0.067376	-0.92931	9.0343	15.875	12.296	0.24007	11.018	-1.0893	15.241	9.6211	9.1794	3.7891	1.618
0085fwb29	white british	20-29	f	2263.25	2.2687	127.12	-34.721	49.886	26.277	-15.637	-38.877	30.867	4.6748	-15.079	7.1956	-16.78	-15.53	-5.4703	-8.1777	11.561	14.426	3.9159	11.943	18.316	3.1596	-10.991	8.1511	7.054	-2.6701	-2.3528	11.589	-1.1679	20.342	0.46004	9.164	1.5521	16.084	9.3786	11.115	-14.367	-2.0412	18.015	19.976	-0.10388	-6.7776	-6.4834	3.5143	5.9934	4.4601
0087mwb29	white british	20-29	m	2307.76	-59.328	46.918	35.636	-33.934	-11.931	-51.047	-5.3947	-24.247	11.799	-4.6958	-22.303	5.6286	14.181	18.796	-13.752	8.1963	1.6327	-4.4665	-3.4275	-3.721	-16.092	4.2609	3.6596	-3.2447	2.8597	9.9337	-6.9022	11.389	11.425	3.0989	-6.6709	-2.7294	-1.5453	7.9215	1.5745	12.499	0.030389	15.605	5.0542	4.9223	-2.3228	1.4779	1.4268	-7.6031	1.8087
0091fwb29	white british	20-29	f	2221.05	2.2714	-69.859	-60.892	19.251	11.946	-8.6742	-1.7324	-41.69	-11.212	-6.1586	-15.877	-14.328	-21.507	3.5166	-8.9305	10.938	13.28	0.62835	-10.607	9.7695	4.8632	-1.9075	5.2489	8.9106	-3.9524	-11.37	4.7271	0.24263	7.6252	1.7526	3.5525	13.093	9.4678	10.063	5.428	6.115	0.29266	4.258	0.35718	6.2106	15.282	1.0273	-6.1374	-3.0192	-1.7501
0093fwb29	white british	20-29	f	2189.14	37.184	-28.904	15.478	-16.862	14.879	-18.277	26.093	6.7158	10.551	44.795	-19.07	25.351	-3.9666	22.43	-0.86394	19.341	17.652	2.1483	1.4403	-17.962	-2.2666	9.3429	0.13356	2.9025	-4.2765	-2.0011	-6.2123	-3.4101	-0.14214	0.80083	-19.161	-9.8722	13.827	-0.94124	6.9073	5.4051	5.158	5.4498	14.002	-0.30977	-0.50574	-6.4144	0.25018	1.4316	0.84543
0094mwb29	white british	20-29	m	2274.37	-29.164	113.94	-25.272	-22.636	149.97	20.321	-14.797	-48.125	26.264	-2.0487	23.491	-34.588	-3.1188	25.23	17.282	-16.687	-2.0365	-8.9559	-24.529	-22.698	4.4968	24.602	-7.5809	8.7444	7.2864	-3.0207	-2.7041	-3.6069	2.4179	3.6198	-4.5437	-0.73635	1.0049	0.90554	11.5	9.112	10.162	-9.5011	5.8493	2.2184	1.0492	1.5242	2.9086	-8.5932	4.5712
0095fwb29	white british	20-29	f	2259.03	-8.95	100.54	57.064	21.741	63.515	-54.799	11.109	14.277	1.7447	-29.373	49.36	15.172	8.9352	5.9232	-11.331	18.302	32.889	-8.8083	-20.59	-22.214	2.2094	-15.686	-16.048	15.58	-21.139	3.105	15.741	-1.9126	9.0136	-10.17	4.3121	5.8218	-27.951	3.5741	0.46132	-11.287	-5.9706	9.2248	-5.1844	15.636	-2.1585	1.0072	5.1298	0.1011	-0.32457
0096fwb29	white british	20-29	f	2268.17	-25.186	-46.555	13.969	35.638	-37.573	-30.874	5.1711	-12.208	19.527	23.458	41.215	-33.764	-20.062	14.476	22.829	-0.2373	-1.9248	-5.9511	-8.1501	16.539	22.243	-10.476	-0.17698	9.3451	-9.6614	-1.014	-13.415	-5.4007	17.363	11.611	-6.8388	6.3682	6.6458	1.9899	3.5715	10.672	10.929	8.569	4.8611	1.7255	18.078	3.4491	-1.2052	-4.0032	-6.1453
0098mwb29	white british	20-29	m	2350.24	-120.06	23.249	-18.625	-5.2759	6.0328	-42.283	34.257	-7.2378	21.208	44.036	6.8251	-40.112	28.217	5.414	-7.3564	3.4124	6.5031	10.62	-6.5262	-1.6407	19.721	-0.74111	-14.621	-20.213	-7.7651	5.6221	-5.9337	9.046	-17.698	-4.0169	2.1125	-5.915	0.58537	-1.3958	-5.9641	3.2286	11.32	0.081531	-2.9098	8.3866	-3.491	0.53315	-6.1972	7.6812	-1.0433
0099mwb29	white british	20-29	m	2421.83	-162.29	118.48	-56.576	-24.288	-13.046	-6.1234	-19.642	-52.66	-39.605	20.195	-11.734	-22.991	-3.9532	-8.9345	-21.638	24.178	-13.853	-7.304	14	11.658	5.8411	-9.891	6.6763	4.2971	5.7221	-13.495	-1.1828	1.0276	3.2884	9.6033	7.8136	-7.4836	14.632	-11.014	2.1196	2.9357	-7.9466	-2.8638	-2.0906	-1.0732	5.3266	14.439	-5.7461	11	3.4375
0107mwb29	white british	20-29	m	2307.48	-76.505	4.8159	-8.5858	4.365	1.685	22.234	19.064	-30.027	-3.0987	26.528	7.0602	-2.0568	-9.7984	-4.8424	-11.624	6.7902	6.8787	-23.684	-2.1441	-8.6034	11.773	-20.416	-8.3785	-15.275	11.018	-0.16862	3.0848	10.732	1.1708	-3.1764	7.8686	-1.8229	-2.738	2.9588	-8.0844	-0.47278	8.1107	-0.32127	-5.0608	-7.0599	-6.1736	-3.6713	5.9028	-10.337	5.9494
0109fwb29	white british	20-29	f	2224.75	40.753	77.812	-95.809	13.035	-67.006	-19.375	64.826	2.365	-33.412	-1.1693	-5.0423	10.219	23.92	21.887	22.541	12.016	-13.481	-22.421	-12.526	14.153	-3.1691	14.674	-18.671	3.6852	-6.2389	-17.053	2.0008	-7.7344	2.305	3.6514	9.0854	-3.8366	0.76249	-3.7009	-4.3968	-8.7592	-7.2951	2.9442	1.2639	6.3159	-5.5556	-7.0309	5.5234	5.971	4.8905
0120fwb29	white british	20-29	f	2220.48	18.401	-9.2333	-45.169	-17.975	-25.565	-28.646	17.359	-26.015	-11.916	-2.3619	-20.318	8.9377	-28.485	-15.351	-20.315	13.087	12.569	3.0237	18.232	32.969	16.694	-3.7142	-8.3201	-18.35	-15.165	-9.8236	12.655	16.219	4.3637	17.102	-10.722	-19.506	-4.7314	-10.033	2.5623	-11.151	6.1731	10.361	2.3601	8.2087	10.107	0.19131	-0.16275	-1.429	1.709
0121mwb29	white british	20-29	m	2301.93	-77.807	-5.9251	-45.28	-45.514	-8.8824	23.058	2.2056	8.6899	-17.757	47.932	6.0579	5.5413	-1.972	-29.778	4.3572	-8.4413	-17.898	-14.344	7.2818	24.545	-6.2039	6.3864	13.034	-19.541	-0.88399	-6.6981	0.95771	0.35097	-3.3571	-8.8607	-6.0844	-14.372	15.298	-12.079	10.308	11.614	-2.7095	7.644	-0.61645	2.5763	-2.0217	0.30646	-5.988	-3.0739	-7.8751
0124fwb29	white british	20-29	f	2153.6	62.147	-122.24	-32.091	22.881	5.6617	27.05	-3.8471	-2.2879	30.322	10.042	22.135	-32.41	-8.2778	-2.8955	-34.948	-19.058	11.046	10.895	15.424	13.829	10.775	7.3329	7.7532	11.168	6.1283	-14.009	2.0251	-13.6	-5.9489	-0.27131	1.3171	-11.724	-2.5861	16.94	1.8334	-9.2924	10.32	7.079	-4.8186	-5.9091	2.7097	6.3809	-9.2818	-14.657	4.7641
0125fwb29	white british	20-29	f	2235.23	32.883	59.287	-9.174	36.89	-9.6317	-29.169	-51.559	-18.518	41.397	-4.5241	0.67387	-8.4176	-27.708	2.4674	1.0717	-6.0368	0.75273	20.232	-20.856	-9.3361	26.663	-28.072	-11.628	1.3084	-2.026	10.097	7.7479	6.469	-17.17	11.297	11.97	5.3172	-13.051	3.4724	-4.9667	20.7	4.554	-5.6231	2.7011	-8.0546	13.417	-5.094	2.3187	2.2137	2.1877
0126fwb29	white british	20-29	f	2234.29	11.472	45.035	-82.181	33.276	-4.1473	-13.909	0.99775	1.4694	-3.0646	-1.2744	-10.224	-0.36394	-20.384	8.6539	-25.274	-11.699	25.906	-14.865	28.717	-7.2597	16.786	7.5229	1.4307	11.639	4.5956	-9.087	8.0418	-1.1868	-9.6333	1.6755	5.1377	4.1846	-2.1876	-1.9788	1.7308	-23.308	13.819	0.24002	12.313	-4.2834	0.71011	-10.632	8.754	-8.0535	5.4718
0127mwb29	white british	20-29	m	2240.63	2.9249	66.922	118.86	-60.734	16.545	-49.5	68.125	35.397	1.4026	2.4965	-12.372	-5.852	2.835	-21.161	1.5434	1.3018	-12.033	4.3696	1.7211	18.092	-9.5985	-7.6424	-4.5962	-12.403	-17.669	9.8851	3.8038	-3.8362	-3.7539	14.768	11.931	-6.1694	2.6303	12.27	11.342	-5.622	12.397	-3.7107	0.19618	11.97	10.591	-1.204	3.1507	-0.32775	-2.6616
0128mwb29	white british	20-29	m	2433.37	-168.04	105.9	49.295	52.186	-64.579	26.666	-25.88	9.659	-31.49	-40.233	13.038	-14.611	-0.99093	-11.383	23.072	-0.25713	19.729	-13.202	-6.9931	-5.2222	-5.8505	-1.175	11.906	5.6732	3.728	16.309	18.203	4.6454	5.1534	-9.8022	10.712	-12.829	4.0586	12.332	-1.7707	1.7293	8.7894	-18.031	-8.2553	5.1761	9.3557	-8.8835	-1.151	-7.0123	10.508
0141fwb29	white british	20-29	f	2255.9	-5.2634	38.169	1.1505	8.4672	-37.884	-19.811	14.1	13.519	0.54875	26.184	4.976	-4.6612	-9.2039	-20.099	7.2065	15.209	3.8822	-24.631	4.881	-17.069	-3.5417	-15.342	15.576	-1.2385	14.582	7.0869	8.4041	-0.36455	-6.6006	-3.6385	-2.4292	-2.2581	8.7278	-0.07519	-12.683	11.221	-2.3653	-20.937	2.5856	10.615	4.2264	6.1702	-8.3725	8.5726	6.1245
0145mwb29	white british	20-29	m	2323.08	-75.371	47.575	-17.464	14.335	-45.666	23.713	25.127	-12.758	53.577	-6.2975	-27.765	10.264	11.642	17.09	-4.6328	-7.8831	22.828	-6.7545	25.852	-2.7682	4.4743	-6.3263	12.207	-11.696	3.3627	11.884	-3.4149	3.3455	-8.038	0.050041	-7.5339	-3.8212	-3.7951	-1.4331	7.8393	3.5716	3.1322	3.8077	-3.778	-1.0785	8.0008	-3.0427	4.8755	-6.8699	-1.0865
0146fwb29	white british	20-29	f	2155.87	79.817	7.1486	-54.609	37.522	-29.182	-27.333	84.056	41.832	-51.335	-19.555	-15.954	-25.01	7.7136	22.706	-15.657	23.646	-15.732	20.881	-18.949	19.202	-40.975	-12.613	-2.5293	6.0765	19.027	-7.9299	7.4415	5.0014	-11.213	-4.31	10.461	0.80993	4.6764	10.495	10.531	-12.822	12.56	8.0282	12.077	-3.3619	3.8328	1.0248	13.074	12.673	7.2747
0147fwb29	white british	20-29	f	2274.25	-23.369	91.951	-34.361	54.549	0.83255	-8.0353	15.186	50.883	-8.7151	31.444	35.325	9.0268	-21.275	-2.4241	9.371	-5.5442	-23.178	-6.2875	1.0107	11.277	7.6575	0.011017	14.1	-10.439	-24.749	7.8985	11.745	24.729	1.6144	-24.338	19.094	-3.5834	-2.9422	-1.397	-17.216	-11.254	0.74062	-9.0753	15.396	-3.1891	-8.8466	5.6906	-0.028984	-3.4986	-1.7738
0148fwb29	white british	20-29	f	2232	37.645	126.74	-5.3768	-7.7364	-4.0085	8.4494	-9.2617	-12.154	-52.501	-51.217	9.9847	-9.2509	-19.336	8.3316	-2.3532	-0.12101	-36.598	-1.9374	-1.2958	3.529	6.6972	4.84	-8.2194	4.4263	-15.379	0.90189	1.4152	-4.5382	17.598	-0.12649	11.691	-3.8536	9.0872	1.8893	3.878	-16.917	9.5041	0.63005	6.0041	2.694	3.8292	-3.9641	2.3481	7.3009	10.711
0149fwb29	white british	20-29	f	2262	37.062	185.58	-25.498	3.5869	-41.383	-11.271	-0.14337	-7.3393	4.3681	26.921	-13.429	6.2652	7.7628	-7.2068	-25.524	-3.4005	24.605	-8.2784	-2.6756	-6.4674	7.9312	-7.0008	-7.1917	-6.6497	-12.384	-8.1399	-2.1075	1.1081	15.767	11.684	1.1037	-0.36663	6.9792	9.6393	0.6565	-4.3869	10.218	6.1876	1.0471	-2.6059	-6.0493	10.057	-15.736	-7.3384	-1.5045
0151mwb29	white british	20-29	m	2414.46	-156.58	137.41	11.462	-49.965	1.5906	-43.477	-10.477	-18.836	21.422	-6.2312	-2.4561	9.5272	-13.429	-11.711	24.395	-1.4644	1.1246	-20.648	3.4239	-2.5378	-27.512	7.7481	0.14161	-7.1626	-9.464	9.829	-22.936	-18.762	5.5611	8.1588	1.3653	1.6484	-6.0187	-7.035	-10.188	5.2544	-7.2779	0.59009	4.3925	2.5655	-4.9125	4.5322	2.9655	-2.2574	2.9419
0155fwb29	white british	20-29	f	2134.63	120.05	33.665	48.769	-0.53883	27.664	100.62	-16.244	4.8886	31.609	11.823	-12.178	-5.6566	-1.1427	22.507	-5.6055	-3.1791	-32.642	-9.9941	-9.5062	-19.523	-2.8713	-16.024	-24.251	11.95	-30.15	-9.7598	1.2801	-1.6904	12.827	-0.35364	-20.981	-16.502	-34.688	22.722	11.018	29.187	-28.623	19.364	5.1366	0.30578	-4.207	-14.386	18.462	9.0431	21.078
0157fwb29	white british	20-29	f	2153.61	100.61	57.764	-112.01	-7.0229	-20.004	5.1018	8.6972	18.945	-13.2	9.0336	9.2267	-3.2073	-34.109	0.9392	6.7491	4.0178	-7.3435	3.0906	-7.2571	1.3156	-0.35588	-10.006	4.0419	2.1961	-3.7329	2.696	-8.5521	9.2926	-3.9435	9.7671	10.492	2.4633	-13.418	-0.84745	-6.1516	2.6155	-4.9749	-1.8081	1.2379	13.337	-5.3101	14.016	-8.8143	1.5852	-6.8434
0159fwb29	white british	20-29	f	2173.66	59.718	-28.24	51.087	38.463	-1.3449	9.7507	29.601	55.809	40.267	21.06	36.829	-0.033595	-2.5382	27.561	-27.464	-4.7628	5.8124	0.97676	-26.807	4.5166	26.55	-6.8693	-12.843	3.8296	1.6471	5.529	-26.59	-36.296	11.406	-11.897	-20.138	4.9612	7.9176	1.832	-2.0327	7.5797	2.2318	9.6117	-7.9439	15.829	-0.75882	-6.8356	-0.28327	-3.5329	-1.7518
0164mwb29	white british	20-29	m	2306.6	-86.421	-15.909	-27.711	-21.224	0.27128	41.059	1.0675	-2.3141	-55.3	20.31	-23.494	-27.798	-10.142	6.9973	-23.567	18.59	-6.8194	9.7774	0.59999	8.2387	7.2524	4.2082	18.035	-1.9933	1.961	-2.7184	3.5953	-1.1018	9.8634	1.9451	-10.985	-2.5882	-2.6775	-3.8131	-9.3982	-0.35061	-1.3077	4.0091	5.0776	2.8193	5.1448	2.1305	-0.25582	1.675	-4.0099
0169mwb29	white british	20-29	m	2363.39	-142.94	-5.9504	40.837	-28.776	28.958	-2.3012	-11.568	-28.902	3.9655	-3.9463	2.6645	-0.92753	21.442	-17.102	-21.892	-12.006	-4.7615	9.057	-9.2795	-14.98	7.9156	-18.576	4.509	-0.8193	1.7223	-7.1492	15.42	7.359	16.209	3.8735	3.7707	7.293	1.0623	16.596	-2.8115	9.442	5.8301	-3.993	-5.1401	6.7049	3.7041	-6.479	0.95121	-10.485	8.0541
0170fwb29	white british	20-29	f	2283.02	-21.327	20.712	-10.647	21.322	-33.952	-5.2884	-48.006	-58.292	-29.127	0.51978	23.82	-5.0232	14.903	18.935	12.774	-22.049	-2.4765	-19.375	-17.465	-0.055863	-8.9901	3.9272	-13.06	9.6485	-13.643	6.2476	-4.369	-7.6681	-10.454	-15.621	12.864	-4.2887	-0.61771	11.391	14.096	-1.4448	8.5332	0.46047	14.491	-0.95488	-6.7241	0.24376	-5.7039	5.0938	4.2449
0171fwb29	white british	20-29	f	2223.96	-28.864	-209.56	-49.156	5.4705	-9.5596	-37.432	18.867	-0.33513	18.835	-32.201	29.466	-28.308	-35.347	-25.399	42.947	16.59	-6.8043	1.192	-8.9171	-3.6136	6.6309	28.619	9.4822	-14.587	3.6659	-3.3164	11.089	-13.633	6.3223	-4.7378	2.7254	-3.4749	-3.6016	12.092	-11.136	5.3958	-6.8102	-5.1379	4.1476	-11.017	-1.7255	5.0496	-3.1955	1.3093	-0.80631
0172fwb29	white british	20-29	f	2257.7	-31.728	-60.103	-55.542	30.924	-52.532	-31.568	-0.82202	19.147	-17.947	5.069	25.944	4.6736	9.562	-9.875	-16.364	-0.61103	-10.912	5.0836	-22.585	-1.0356	-6.6105	-24.999	0.059145	6.3491	-17.784	16.243	-19.583	0.76862	9.496	-1.287	-0.27906	10.716	-6.176	-4.4851	-12.56	7.0866	-1.8903	-8.6694	-5.4328	-4.0787	1.842	-3.3995	6.9408	3.2526	3.3953
0174mwb29	white british	20-29	m	2383.04	-156.43	-0.20658	-0.91881	39.192	32.422	24.131	-7.0009	-66.068	6.473	-9.1052	-35.986	11.361	24.268	-1.8364	-29.692	10.934	3.574	-16.552	0.20411	14.989	1.9338	-1.8053	19.305	13.962	4.4219	0.17678	-3.0431	-11.648	10.033	1.711	16.645	-3.1463	-6.7565	5.1153	11.172	-13.341	2.7245	-7.6757	-1.3045	-2.6641	6.1415	-0.82167	-2.7943	-4.4382	-11.142
1035fwb29	white british	20-29	f	2239.74	41.704	140.37	-18.87	-3.9468	-3.7666	50.354	1.3174	-53.619	0.73805	-15.483	-2.3682	-1.0451	-36.721	-7.0903	-18.839	3.9934	-6.4136	-4.6125	17.528	10.094	4.8765	3.9029	-22.534	-9.5596	3.1839	-6.627	9.4613	-8.6338	-0.85189	13.401	0.23307	-18.851	5.9192	-5.8313	-15.504	4.7099	-7.5155	1.0929	5.6024	20.553	-0.97276	4.3878	4.3598	-12.293	15.062
1041mwb29	white british	20-29	m	2379.49	-117.61	125.35	-60.6	-0.41912	-45.635	36.379	18.37	-17.777	13.397	-17.219	-15.498	-16.344	18.236	-14.822	5.2057	4.2011	3.7042	-7.7649	-13.244	8.3636	7.4271	4.9951	-16.921	9.2509	3.0241	4.7504	-12.042	0.57979	-0.33231	-10.193	4.1111	-10.637	-15.145	-4.5457	-9.4044	1.6718	3.305	-2.8821	5.9939	5.9849	-11.35	13.666	8.5717	4.8889	2.8626
1045mwb29	white british	20-29	m	2409.81	-153.08	204.71	-64.115	-66.645	50.309	-33.484	34.941	41.645	25.699	12.706	16.119	-41.967	21.565	16.407	12.729	-18.809	0.5341	25.092	-13.319	-29.675	-61.371	-16.666	-18.545	-9.633	8.06	-16.071	6.9799	-11.301	15.974	2.0291	-0.63398	21.704	-12.575	8.4317	-6.8116	-20.08	-15.441	4.8982	31.881	-21.718	22.768	7.2146	-0.65414	-22.2	-28.14
1055mwb29	white british	20-29	m	2350.44	-107.39	58.098	30.283	85.514	13.004	31.016	-30.321	51.155	36.15	37.015	-9.8177	61.17	26.124	-11.025	-41.104	6.0903	-51.424	-13.122	-23.434	4.7031	32.232	-28.048	16.081	-7.1139	20.978	9.1773	-7.6601	-16.209	-3.8771	3.8795	6.8712	1.8551	-13.96	-11.268	-13.114	1.8667	-28.15	-3.8324	24.191	-7.8284	-6.5021	7.855	17.31	13.121	1.9386
1061fwb29	white british	20-29	f	2189.15	63.826	62.682	-52.37	30.704	2.7794	-25.466	-30.922	23.385	-37.723	-25.954	6.2073	-43.31	4.2119	15.309	-10.933	12.83	-12.637	13.092	0.52635	17.384	3.9752	-26.574	-5.2049	9.1406	-29.373	2.2234	-15.899	-4.039	12.653	-6.8214	22.586	-13.529	-9.2466	-7.7875	6.4186	6.0328	8.3438	-6.8399	-12.489	2.8324	7.6923	-6.9054	-7.9431	-1.8487	-12.202
1067fwb29	white british	20-29	f	2228.24	2.5203	15.783	-7.1686	-18.148	18.207	-13.194	4.5539	36.935	16.849	41.507	17.077	8.3374	-18.751	-18.938	7.5853	-19.232	-8.388	-0.16938	-4.8495	-15.4	16.06	3.6496	13.976	14.639	-11.629	9.5567	5.593	8.904	-2.313	-7.9377	1.8111	13.11	3.3765	4.0984	-11.289	3.7373	-4.4784	7.5535	14.188	14.043	8.612	10.687	11.162	-1.2789	-4.055
1106fwb29	white british	20-29	f	2189.13	19.865	-30.306	-72.847	-8.461	60.238	-13.012	18.554	15.092	-12.35	34.553	24.127	15.989	-18.546	-3.9337	-3.1292	16.745	9.9792	-2.7027	36.151	10.146	12.891	3.941	-13.34	-6.5763	-7.9717	13.791	-11.343	-18.208	-13.464	-20.939	-9.7485	8.0493	2.6429	11.668	-8.1886	-4.4125	-6.3076	-16.17	2.8278	0.91537	3.5972	11.807	-1.872	-8.1851	-4.4004
1162mwb29	white british	20-29	m	2354.31	-133.77	-112.59	-37.978	79.621	0.80491	-26.308	-125.26	6.9455	-36.206	18.997	-58.761	18.004	-49.652	25.537	-1.2546	0.39413	-33.071	-4.3948	-5.3843	-2.4117	-35.41	-36.521	-5.6513	-30.847	-4.6807	3.7684	-5.0894	8.5257	-45.707	-8.4241	5.1518	-17.22	-6.9376	8.6479	7.4803	-5.4463	4.5382	-7.5705	1.4466	8.3555	-1.5022	0.11001	0.52013	9.8396	-6.6832
1193mwb29	white british	20-29	m	2425.7	-196.8	-4.5958	-26.859	-35.504	-57.636	1.5156	13.454	-19.259	7.334	9.1523	-2.5349	-15.9	25.962	-23.124	14.447	7.1338	-3.3595	0.28577	-12.844	8.7368	13.505	6.3651	-7.7504	-0.12873	-8.2794	-2.1774	-2.1659	1.6942	-1.2774	-8.2371	0.80811	7.4156	-12.373	4.2648	-6.8285	2.6672	-0.76886	2.4725	2.8264	-4.1069	-1.5543	2.8188	-5.3262	6.0189	1.7197
1195fwb29	white british	20-29	f	2268.43	3.5826	86.181	-65.077	-18.621	-33.206	7.4548	-25.171	-42.572	0.60204	20.24	-8.5671	-41.185	7.4647	-0.33653	-7.4986	7.7896	3.6518	8.9919	-26.338	-12.754	10.183	5.5358	-7.5463	-14.669	-8.7243	-13.066	-9.4102	0.63377	-11.039	0.52672	-1.8035	6.7098	-4.7021	-1.8049	-2.6686	2.2614	1.1118	-1.9549	-6.7073	-4.2186	-2.0697	3.8662	-9.7025	-3.8068	5.9726
1200mwb29	white british	20-29	m	2399.52	-170.44	23.295	37.017	-18.346	4.7792	7.9891	6.3106	-26.286	23.088	4.2293	-18.559	-12.449	0.63506	-7.1261	-9.8342	10.79	-1.1839	-24.732	13.831	12.466	2.3834	-5.8241	-7.7308	2.0521	-1.1975	5.2327	2.6997	-5.0179	-8.7254	-11.836	8.1924	4.6567	0.74979	-1.058	3.1135	3.9582	3.3296	5.3237	-4.3984	2.4312	-0.9804	13.016	3.0488	2.6996	-7.8112
1256mwb29	white british	20-29	m	2354.6	-136.3	-43.14	39.389	11.483	75.971	-18.268	-63.314	-57.363	24.836	-24.321	-6.1469	-11.217	16.23	9.5443	9.0909	24.781	-10.27	-22.344	10.023	-0.82298	11.077	-5.3527	2.0106	0.29654	5.8618	-5.0656	-16.09	-1.846	-6.6191	0.34839	-3.6986	1.168	-5.7177	-15.347	-13.378	0.42208	10.241	-1.6025	-4.4952	3.4001	-6.4827	7.9877	-3.256	-2.5316	7.8889
1266mwb29	white british	20-29	m	2336.83	-110.98	58.347	-47.918	8.0012	42.729	4.6085	-0.59349	17.321	-33.343	8.8291	-1.8834	-49.628	23.409	0.4943	-6.3377	17.922	8.0372	-21.172	-8.0829	5.8428	-20.496	-5.4432	5.5957	-11.728	-12.881	-6.1073	-22.184	-4.7154	4.7101	-21.733	-5.85	2.5148	-3.8226	-8.1729	-14.206	-19.198	-3.0223	-2.6965	-8.0585	-5.7776	-6.3168	-4.6409	-8.4273	4.8909	2.2631
1272fwb29	white british	20-29	f	2249.66	-54.099	-173.66	-17.167	50.955	-12.016	-25.3	33.109	57.099	-8.527	31.4	-54.111	-3.1495	-10.392	39.249	22.291	17.391	-18.507	-17.217	-16.387	-7.2958	-41.458	15.216	-29.09	-8.2627	2.9457	-26.051	33.265	8.8731	8.2316	10.337	5.5707	26.455	10.223	-6.8665	-13.847	8.32	11.494	-15.783	-8.8575	0.047283	-10.467	-11.393	11.19	0.7079	-5.75
1274fwb29	white british	20-29	f	2243.09	-6.6291	37.034	46.327	-19.009	37.086	-103.63	-19.82	61.509	17.961	-28.856	-60.033	16.732	-7.85	-9.713	-7.2453	7.6372	-62.803	15.576	-28.984	38.725	-2.9401	-7.8879	5.214	-14.646	10.338	6.1263	22.368	-28.908	-30.826	6.2023	-19.595	17.497	-2.5086	-1.0093	-0.12813	-5.7411	6.6604	5.1536	-18.697	-0.14778	14.394	-2.2179	-5.2069	-0.90361	-8.2844
1275mwb29	white british	20-29	m	2253.36	-37.453	74.279	-53.296	-79.942	95.604	24.084	29.911	25.896	-15.624	20.496	8.6221	5.0789	-20.87	-11.024	3.1316	14.802	-17.503	-8.8651	2.0895	-0.49097	-34.249	9.1902	-7.5656	25.51	3.283	-5.4943	-30.418	-1.1287	-0.33184	6.8883	6.1406	5.8031	-15.818	1.6981	-1.5423	-6.6218	5.4739	-3.2998	6.2354	-3.1805	11.791	-2.63	-5.3214	3.8796	-5.225
1294fwb29	white british	20-29	f	2149.83	58.674	-69.728	19.087	-21.882	43.477	-33.297	46.181	20.628	0.15078	19.514	41.184	8.9868	-39.303	-1.5838	-3.3787	18.149	-17.472	-6.8949	32.514	18.366	8.7655	-3.6039	-9.1066	-1.16	15.435	10.996	-17.335	-0.79496	16.566	-3.4379	9.1622	14.747	10.853	-8.1525	11.404	1.3358	0.98343	7.8731	5.5781	-4.5455	-9.053	5.0174	-4.8564	0.55357	6.5874
1303mwb29	white british	20-29	m	2365.15	-139.9	-35.908	-56.645	2.0228	-42.998	-70.841	-6.5406	10.611	-44.207	49.797	-31.593	14.813	18.762	6.642	-6.1179	-3.777	11.888	-0.051596	-5.6851	7.8311	11.883	-5.8905	3.739	-30.627	15.013	6.4603	-6.6257	5.1408	-17.188	-2.7532	5.962	-0.74567	5.6577	-3.6057	-4.4583	9.075	-4.1529	6.4402	4.6083	-5.4659	-4.7439	-4.1853	0.14212	-1.0099	-1.3827
1304fwb49	white british	30-49	f	2186.9	29.38	-43.071	73.55	-17.593	30.377	31.545	22.49	35.134	-13.987	12.772	-24.319	-25.821	14.143	-2.5599	-7.7827	-4.7338	-3.6644	-16.958	-6.421	4.2843	12.965	3.6714	-2.2149	-5.6828	7.967	-5.9976	4.6846	9.05	11.858	-0.23192	4.5804	-3.0567	-9.6822	13.227	-9.6165	-1.8548	0.99947	-3.508	4.771	-0.082432	-6.1476	-0.86232	-5.7308	-2.6643	2.3465
1305mwb49	white british	30-49	m	2414.07	-172.79	11.832	35.89	-7.8345	-93.803	-43.995	-9.2808	56.136	9.9691	-10.761	-12.368	-17.585	-10.809	27.407	32.413	-27.698	1.0147	17.844	-3.3718	9.8925	-12.775	-14.435	-16.414	10.744	1.72	-20.07	-3.749	19.592	7.4204	11.292	-33.486	-6.1081	-13.81	-8.7032	-12.726	-11.994	-2.0185	17.943	13.913	1.6166	-1.9554	6.2834	1.5192	-0.46627	-24.136
1306fwb49	white british	30-49	f	2295.72	-46.245	49.757	-35.53	18.045	-8.3826	-63.287	12.238	7.4177	12.931	49.08	20.864	4.0138	-16.226	16.877	2.7082	9.1032	-15.404	-31.816	-14.977	19.73	-2.4084	-28.825	0.67337	5.0788	-9.4596	11.262	-13.757	-4.2211	1.6728	4.3971	9.4901	1.1977	-12.302	0.40327	1.4803	9.455	-15.577	0.18803	-2.9667	-3.8589	8.018	-8.4088	-10.381	-9.2771	5.7575
1309fwb49	white british	30-49	f	2218.77	37.399	28.505	18.421	-13.868	-64.798	13.351	0.89855	33.491	9.0637	36.814	33.998	10.329	-2.061	-5.6303	-3.6624	-7.9753	23.568	5.1094	9.8424	17.781	-26.065	-6.923	-5.3789	2.7181	2.6677	-10.832	-3.5638	-8.275	-3.6879	7.574	-9.5577	0.67847	-0.08099	-5.6757	-14.278	7.8814	4.5401	-11.826	13.879	4.9709	20.257	10.179	2.7899	-3.1019	11.07
1313mwb49	white british	30-49	m	2334.92	-99.952	50.395	11.608	-5.8921	9.2315	56.945	-16.524	18.221	-36.017	21.326	-55.61	-21.686	-7.2081	6.5409	-6.6903	8.4766	3.4407	-11.765	0.84062	11.814	5.7239	4.5081	3.4378	-16.775	13.538	-5.6339	-4.3058	-7.1696	-11.259	6.0656	9.4261	-6.2139	0.93075	5.3831	1.1407	-5.9768	-1.9376	4.6603	5.0021	-3.7392	-3.8428	-3.1485	-8.3719	-11.291	7.9061
1319fwb49	white british	30-49	f	2239.49	7.095	-60.432	41.777	60.828	-72.257	39.673	-39.832	23.282	-7.7691	21.23	-11.784	34.379	30.54	4.2007	26.52	15.063	-6.4677	-37.67	1.8908	-9.1654	14.58	-4.5245	-15.621	-6.0356	-10.894	-14.703	10.18	8.6611	-21.341	20.415	-4.1197	9.144	8.5653	5.7978	9.6765	-0.53484	-0.16126	2.2585	14.866	-14.029	0.93054	2.0116	-9.7463	3.1904	3.7105
1327fwb49	white british	30-49	f	2176.42	63.285	2.9023	-19.935	-39.121	0.95129	4.8595	42.983	-27.88	33.328	35.4	-13.429	9.1858	-6.0493	-2.4704	-7.2644	1.8689	11.55	5.3603	-2.7765	11.279	-11.621	13.906	-5.2213	-3.6471	-11.155	22.662	3.526	-11.847	-14.67	-1.4972	-12.596	3.5716	0.33572	-7.5075	4.0867	-2.5992	3.1423	-21.29	0.075624	-8.8386	8.4495	0.64977	-1.4425	-1.7751	5.7903
1329fwb49	white british	30-49	f	2204.08	-5.1956	-88.033	-25.152	15.144	60.457	-41.683	-7.1266	34.627	-12.099	-0.30408	33.687	-20.194	-28.113	-1.5667	-4.3306	27.665	17.944	-17.101	6.7032	13.688	-30.628	1.7304	-1.0284	-14.651	-5.6864	2.872	-18.193	-4.4854	-2.8209	13.383	-3.5227	10.774	-4.3916	10.806	-0.40408	11.405	-0.51972	-5.2276	0.023791	-6.6985	3.8137	3.8666	7.3864	3.2009	12.841
1335mwb49	white british	30-49	m	2373.44	-111.59	122.94	5.1689	19.503	-7.7047	32.803	30.755	-18.083	28.463	14.179	-20.317	-15.668	-10.774	23.739	21.27	6.8983	12.534	-3.0231	-1.4662	9.1655	26.175	12.779	-3.9878	6.3801	20.087	-0.51	7.9701	11.822	-4.2751	12.967	7.7313	-1.5059	-15.027	-0.22085	-4.0912	-1.4198	0.20863	-1.1324	2.5942	-0.24293	10.718	0.43507	-1.973	2.2752	3.3515
1373fwb49	white british	30-49	f	2321.63	-109.9	-62.829	-35.565	6.1783	-2.5902	-14.068	14.027	-26.847	8.5402	-16.277	24.03	13.9	-12.072	-2.4728	-14.755	11.473	-24.135	35.595	-2.2222	-20.587	8.6378	-14.54	16.109	9.6003	-13.549	22.165	-1.5137	-18.675	-22.656	6.9877	16.984	3.3434	-0.82792	2.4276	8.8688	1.947	4.2619	0.92776	5.1186	-1.2866	-6.7881	-7.7912	-1.7696	2.8655	-0.45438
1374fwb49	white british	30-49	f	2201.02	39.982	-24.881	-86.269	41.34	-38.103	-25.424	3.2991	-14.984	-21.849	4.3737	-1.9632	30.059	-13.633	11.044	-8.5714	4.0145	10.122	-1.5442	7.7677	-9.1439	0.6874	-14.219	-15.559	16.247	1.5367	8.7474	-2.0568	15.834	-9.956	-8.9043	-32.679	-11.988	9.4778	-4.5271	6.942	-16.502	10.405	-5.015	0.71624	6.3496	-4.2524	2.788	5.4135	6.5925	-4.7506
1376fwb49	white british	30-49	f	2233.71	14.271	69.167	-43.321	23.315	0.19922	-26.413	13.984	17.818	-18.093	-5.7938	-8.3096	20.632	-14.414	1.8839	-11.587	10.143	30.828	-20.727	-21.938	-10.333	7.0542	4.0168	10.538	-7.7208	-11.425	-10.646	-5.7883	-21.567	4.1396	8.2212	-0.066413	0.19489	4.9337	10.087	-1.1761	0.9021	-0.8971	10.206	12.179	0.66729	6.3459	4.8383	4.8185	3.1949	-1.3983
1379fwb49	white british	30-49	f	2299.08	-68.605	-52.301	-93.53	85.726	-9.4105	9.5308	-45.24	0.51228	78.43	10.64	23.267	20.775	13.815	-17.436	-7.5037	6.4432	-5.1674	12.414	-20.79	9.8244	-15.878	7.451	9.8059	-13.54	-45.838	-3.9232	-17.5	28.424	-8.521	3.9111	-4.5434	15.127	12.664	17.823	-21.532	-23.997	2.2564	-10.657	10.146	11.838	10.655	-0.75675	-5.2119	-18.17	1.7425
1380mwb49	white british	30-49	m	2421.6	-232.32	-84.125	3.3334	-10.606	57.549	-45.225	-15.172	0.94006	17.059	7.4158	-52.466	6.9554	12.738	6.593	-28.155	-0.053417	8.7705	-17.438	8.346	-4.9325	-18.845	-17.183	26.849	7.3344	-28.392	-15.781	-13.183	1.4474	-9.3071	-16.454	-5.675	-0.19753	0.24355	-18.017	-8.4235	20.493	14.943	0.91138	2.5253	14.738	-12.49	6.3372	0.80732	1.1314	-4.4166
1384mwb49	white british	30-49	m	2307.21	-82.665	29.626	44.825	-42.193	24.583	3.0125	3.981	30.941	-52.646	26.047	-9.9088	-28.216	-3.21	-28.221	-11.41	1.013	-27.697	-1.1162	7.6082	0.67286	2.6603	13.798	17.28	-18.078	16.756	0.58384	-0.82755	-9.6088	-0.50907	10.324	-12.132	-4.6994	3.2425	-4.5117	5.5475	4.5927	-1.4022	-2.0809	5.1793	-1.9054	-7.729	-0.088514	-5.2783	-11.892	6.9871
1386fwb49	white british	30-49	f	2197.48	29.048	7.9338	39.983	-32.561	48.388	27.976	23.441	10.254	18.369	24.253	-0.72569	-33.398	-3.5714	-26.208	-20.995	-7.6606	2.2026	-21.788	19.028	-9.075	-11.208	-13.124	-17.988	-33.984	-1.8891	23.852	-12.889	-2.1356	2.6671	11.208	-9.481	-5.2343	13.577	4.615	-22.878	9.9791	6.3028	4.4409	-15.323	0.7786	-6.7943	12.851	4.4369	15.772	-13.637
1388mwb49	white british	30-49	m	2287.31	-61.945	-49.244	-3.8198	-16.299	-10.304	26.676	-17.354	-24.074	-21.146	31.282	6.3997	0.30201	-6.9953	3.0242	12.328	-26.728	3.2158	13.366	-7.3181	-9.1375	12.578	-1.3504	6.6615	0.8471	16.257	-2.8198	-6.1733	9.9017	5.8583	2.709	6.1461	0.59017	-8.4969	1.8986	-9.9305	7.2245	0.9902	1.9143	3.0494	-2.2572	-0.54524	-0.76318	1.7611	-3.6405	2.9222
1389fwb49	white british	30-49	f	2206.59	32.32	-11.031	-15.324	-0.95657	-31.029	-9.4102	18.408	-19.351	15.039	-23.419	-21.41	15.459	-10.474	-4.2009	-8.3148	2.9285	-8.6565	11.56	15.271	-17.615	2.0026	-5.2576	13.739	-14.145	-0.01851	-19.278	-0.33536	-13.844	-11.47	5.029	14.684	-0.91214	-12.113	-5.8435	9.1612	0.026282	-9.7154	5.4448	9.0526	-1.3919	4.8036	8.4402	2.3828	-10.693	14.393
1393fwb49	white british	30-49	f	2233.91	-4.6418	23.387	11.987	-4.7117	80.011	-26.661	-25.838	-28.832	-11.081	-16.691	-12.922	1.1375	4.2661	-11.46	-17.119	13.593	3.4869	-19.776	0.91801	-8.2247	-1.1573	-8.9408	2.5783	-4.2943	-4.4246	-18.812	4.5334	8.7039	12.493	-2.4391	-4.9968	4.8206	9.1256	4.8448	-12.469	-3.2371	-2.5576	2.0509	-9.8329	-9.5899	7.5704	-3.4595	-6.2846	8.9675	4.075
1395fwb49	white british	30-49	f	2185.73	29.711	-56.662	10.254	26.53	56.2	-32.258	-52.803	11.119	-31.886	-39.415	-25.09	16.588	8.2837	-10.727	-20.597	-29.403	17.79	15.611	14.616	-15.304	17.693	-9.1672	-6.3272	-10.255	-8.3486	8.93	3.1947	-5.8399	-1.1931	1.9658	-6.5127	18.002	3.2769	16.56	-9.3932	14.2	11.673	1.2846	3.9998	8.4105	2.6333	-1.8709	-7.2572	2.1334	-5.6368
1396fwb49	white british	30-49	f	2268.56	-34.766	31.568	-33.743	-26.606	-8.8194	-36.461	53.976	-8.6684	-25.883	12.335	18.024	32.733	2.1184	5.4694	10.15	2.5121	-0.60543	-13.253	-11.718	-24.732	10.148	8.0156	-4.9435	-8.1818	-4.8247	12.148	5.7267	-6.2868	-18.002	-11.848	-15.968	7.2265	-7.3002	-3.5379	9.5113	-5.2731	5.8214	-11.454	2.7376	0.1066	3.787	-8.3151	-3.6492	-1.7246	7.6035
1401fwb49	white british	30-49	f	2188.59	32.356	-110.07	13.632	-19.346	-7.2644	-98.815	-9.6406	-11.524	-5.4346	-23.321	-22.629	14.607	-5.608	-26.002	-6.5509	-11.984	17.726	8.5033	-6.4549	-3.521	-10.426	4.2006	-16.933	2.2085	2.1338	4.7265	11.236	5.599	11.19	2.2633	3.7814	-3.4553	-6.2222	-4.1563	-10.456	10.724	1.248	20.01	1.3585	-1.2515	0.38827	-3.0222	2.2015	-0.40755	-2.7775
1403fwb49	white british	30-49	f	2266.78	-32.874	-2.851	11.853	26.751	-0.77846	-60.265	0.40721	1.1732	-21.921	-32.249	33.855	-12.869	2.2336	0.71965	-9.9425	-13.968	2.9935	-10.006	4.8262	1.7436	-0.15573	6.2558	23.18	6.9283	-17.361	-2.0657	6.6373	5.3078	9.9017	-27.853	-6.1945	7.7912	7.657	9.5772	4.9174	-4.9959	2.6128	-15.931	-4.4639	-7.0176	17.731	4.6749	6.3648	-8.6939	3.763
1406mwb49	white british	30-49	m	2331.61	-109.2	-25.384	-10.532	-27.294	-42.352	53.964	-14.659	-3.9987	5.1345	-49.081	32.304	27.953	-4.1684	-17.294	-18.825	-7.1587	-21.27	-1.3751	-6.6533	-24.048	-36.068	-16.215	2.9748	9.1552	25.449	-5.3952	13.811	-5.4492	-10.13	-18.074	-15.108	5.985	-3.7207	6.4691	-7.7746	-4.1209	15.202	1.3372	-3.7446	5.3337	-9.1049	-1.4158	-2.8112	6.7092	-0.51559
1407fwb49	white british	30-49	f	2229.85	-14.761	-26.781	-23.217	-37.858	38.132	-25.987	9.7502	9.6254	-15.793	38.443	6.6403	3.5626	-27.16	-1.3792	-7.0784	16.519	-4.8835	21.838	-6.7526	-16.062	8.9517	8.1455	4.1957	10.779	7.3571	-15.807	6.5556	6.6436	-21.383	7.9425	-10.557	1.0338	-14.341	3.5309	-1.1782	-3.2738	8.7727	8.455	-8.8574	1.45	5.7483	25.832	-7.0237	10.489	-8.3379
1409mwb49	white british	30-49	m	2301.5	-53.99	89.153	54.165	-4.5171	12.546	-10.293	-11.704	14.107	1.8199	-31.039	-37.842	4.1993	-0.30204	-5.3977	-0.98168	17.766	3.8541	-2.6593	-8.451	-0.61358	-5.5846	-6.4047	-13.201	-1.1921	11.196	9.2741	-10.878	-3.3981	0.44301	-5.4044	6.3616	-13.907	-1.0936	0.67048	-7.1848	-9.5931	3.0735	-3.9679	5.4129	4.4288	-2.8751	6.4981	-0.97447	3.1203	-0.35264
1412fwb49	white british	30-49	f	2186.31	28.208	-51.175	-39.488	-33.667	-11.711	-52.535	13.648	37.66	-15.923	-22.252	-16.543	-4.4984	44.613	-4.154	-13.14	-3.0526	-6.2525	-2.4377	-1.1317	-23.476	-9.7572	2.3485	-16.371	0.7153	-1.3938	-5.245	-18.141	-9.2911	-12.381	-0.30935	-0.22656	12.676	6.28	-3.3093	-5.1354	-0.91833	-9.2819	2.8522	-9.6343	0.52969	-9.2491	-3.124	0.6386	-7.8105	4.1991
1415mwb49	white british	30-49	m	2393.48	-186.11	-24.064	-27.455	40.112	63.966	25.998	-63.716	-1.7398	23.315	-26.117	-55.142	-7.8532	28.866	-11.703	-16.308	14.974	2.4446	4.3428	13.464	-11.923	1.4667	0.92074	-7.4663	21.113	4.8904	5.0038	-5.9323	4.8714	6.5983	-5.7761	-7.7445	-8.5129	-6.3642	-6.972	-2.4243	5.701	-0.21799	3.6603	-10.928	-11.529	2.9398	-5.9236	5.1192	6.4203	-2.8725
1418fwb49	white british	30-49	f	2310.1	-33.896	121.72	39.977	-38.397	-44.04	-20.126	27.103	-33.808	0.31888	-24.209	-14.25	3.628	-26.902	-2.2883	10.245	1.2025	-25.417	11.829	-20.023	14.88	4.4671	14.404	-19.217	-9.18	-6.9797	-10.465	25.17	8.4407	13.098	1.8058	7.7917	-8.8172	9.3242	1.5864	1.5279	-1.6093	-11.84	-5.3548	16.453	5.4499	-6.7564	-0.22386	3.1867	-7.7191	1.7895
1425mwb49	white british	30-49	m	2305.17	-102.04	-96.48	-1.4276	0.94785	-1.9991	6.4922	40.788	-17.575	7.2588	-26.517	8.4479	-18.885	28.485	-7.2455	15.25	-23.863	2.3395	-15.798	1.566	13.091	1.4308	6.0392	6.9504	-6.514	-13.097	9.4456	-13.457	6.7161	-10.152	-5.6122	2.9095	8.787	-16.461	5.4745	-1.0193	9.866	22.198	0.53155	3.5466	-4.8131	7.3377	-2.9786	-0.40364	5.37	2.9228
1434mwb49	white british	30-49	m	2278.02	-65.048	-11.065	-9.5647	-5.0843	52.194	40.152	8.6236	0.48902	-40.057	-22.573	17.202	-41.772	21.162	9.2623	6.518	-25.62	-13.379	-2.9052	11.27	2.1292	11.229	16.274	12.772	5.547	-5.2707	-1.5555	-7.6709	-9.1255	1.9854	1.5456	-6.4816	-5.0228	2.53	-7.3936	-0.11262	-2.4866	5.8725	5.9095	-2.6904	0.7735	-2.7741	7.0843	1.1058	0.89365	-6.9139
1435fwb49	white british	30-49	f	2231.33	18.846	58.988	-52.122	-34.195	4.1571	-4.7279	14.031	-1.8366	-20.001	54.849	51.079	5.1221	-22.976	8.5538	-26.401	-8.6232	0.74624	-2.5224	-24.721	-4.0255	3.4784	10.822	6.0179	6.3096	11.1	21.98	10.036	-2.5615	-12.839	12.359	-1.3679	2.1931	9.9873	-14.332	-1.082	-14.109	-8.3387	0.84449	5.9963	1.5849	-2.7532	14.851	10.043	-6.7358	-2.6769
1441fwb49	white british	30-49	f	2146.07	78.531	-10.204	3.2469	-13.644	-10.452	11.848	42.528	53.15	-42.942	-1.0684	-11.43	30.953	7.4275	-6.1276	15.824	21.36	17.397	11.841	-6.4516	-24.151	28.927	9.4809	-10.237	2.1525	4.1588	-7.8095	-2.7617	3.4476	9.4557	-3.6878	-8.9894	-3.461	-1.8496	3.6129	-5.5701	-6.5413	-3.2443	-9.0617	1.0522	6.7728	11.525	4.834	-0.25304	6.079	-0.9497
1442mwb49	white british	30-49	m	2323.02	-122.26	-185.35	-81.963	61.607	-9.8403	-11.215	-14.407	-40.539	-58.233	-87.813	36.952	-12.635	-12.027	6.1401	30.636	28.483	-5.9525	-28.557	-20.666	3.8667	-3.0098	16.442	13.881	-27.889	2.777	10.563	-10.757	-7.6647	5.6692	-12.308	-22.703	2.1851	5.8924	-10.968	-2.2396	15.984	-2.9565	5.3783	-0.28164	-4.8375	-1.0237	7.9082	7.748	-9.451	4.0363
1444fwb49	white british	30-49	f	2293.71	-61.882	5.9597	-8.78	22.632	9.0174	18.119	-59.877	2.1673	8.4151	-22.352	-8.5161	14.514	0.053246	-20.54	-20.066	18.362	27.429	-3.6769	13.589	2.7962	6.7958	-13.263	-2.4156	-7.4518	4.2999	12.074	0.62633	19.122	1.7135	7.9386	1.8829	20.538	-0.86638	-19.515	6.7949	-1.1862	-7.2944	-0.19924	3.3655	-4.2373	5.6641	-0.88495	-3.8105	4.7385	-2.5589
1445mwb49	white british	30-49	m	2248.04	1.6682	38.127	31.715	-33.941	-64.14	48.283	-21.414	55.846	-6.8552	20.305	-21.992	-6.1688	3.4189	-9.83	-9.5936	1.4192	6.3981	-2.2939	17.38	-8.8455	-1.4261	-0.81882	-12.518	-5.4991	12.854	6.0757	-22.582	5.2777	-8.5547	16.382	-6.8153	2.5845	-0.78508	7.5476	-23.115	6.2119	-0.078048	7.5724	3.4469	8.3727	-0.73886	-0.037687	13.514	-3.6694	-3.1262
1450fwb49	white british	30-49	f	2261.58	49.434	234.23	11.529	11.122	-29.667	28.31	-21.517	27.402	23.802	-12.475	-33.994	13.138	2.1441	4.4929	-33.189	-27.881	-25.124	-18.428	-12.052	-9.3015	17.158	20.224	-7.7511	-16.319	-29.697	11.397	10.82	-3.011	12.841	17.053	-4.3872	23.92	-12.413	12.556	23.581	11.842	-5.8709	-31.775	-8.9602	-11.261	-23.11	-4.6499	21.328	3.1722	-27.052
1451mwb49	white british	30-49	m	2398.36	-190.15	-64.567	-73.498	6.4208	-19.923	39.358	33.281	-31.874	-13.538	-14.324	0.18786	-27.145	9.5929	8.6916	1.2346	12.102	3.2627	21.851	-4.4434	0.77704	13.223	13.291	-2.9984	12.426	1.172	18.918	4.286	3.1951	-3.6148	7.1387	-8.9446	-2.4446	-13.174	5.0449	6.3311	-9.4734	14.353	-6.4597	-8.6694	3.4576	10.998	-11.877	4.3249	-0.80462	-0.56446
1453mwb49	white british	30-49	m	2386.27	-170.75	-4.4361	-18.803	-19.913	-12.48	-32.593	21.299	2.9979	-14.035	-18.176	16.053	2.5207	3.0947	-10.34	-11.495	-3.3874	-7.8436	20.977	-12.007	10.879	-2.806	-6.1119	0.93118	10.313	15.479	-9.3265	-5.4102	14.918	10.569	-4.5118	-17.49	-2.9191	-0.93627	-14.384	2.424	2.6885	1.7365	-10.695	1.3113	-1.2386	5.8384	4.446	4.724	6.5422	9.2142
1455mwb49	white british	30-49	m	2381.12	-127.93	58.347	-43.561	-11.361	-50.06	61.082	-11.42	-45.781	-17.783	-0.22674	9.9576	8.6519	-26.616	-0.96513	12.588	-31.439	6.148	-6.9324	11.79	14.917	0.23628	-5.7107	7.8683	-2.0765	1.0346	1.3622	6.4895	-3.8307	6.2352	0.54404	16.948	-5.1799	9.6456	-2.9831	-6.7674	8.4005	-10.772	6.1143	1.8276	-12.478	1.2545	4.4275	9.8053	1.36	-11.077
1461fwb49	white british	30-49	f	2331.92	-103.87	-9.3221	-16.116	11.282	-47.868	12.576	77.025	4.2418	20.117	-7.9177	27.768	-22.659	-14.516	-2.5724	-5.4316	-7.9966	7.6786	-31.952	3.1338	-12.89	6.8963	-1.0295	24.167	12.776	-3.0204	-11.47	0.62419	-6.9742	11.794	-8.6049	17.347	2.646	13.916	-7.737	-1.4556	1.1946	3.0832	3.7734	-8.0121	3.2526	6.3742	10.444	-0.072268	-1.5571	-10.087
1466fwb49	white british	30-49	f	2308.63	-62.592	-16.879	23.329	-7.085	-8.6572	27.934	-87.931	-34.225	0.77234	7.9289	27.81	-1.2535	-19.083	-5.325	27.897	19.672	15.73	8.9136	-18.714	4.2809	26.256	0.31412	-19.35	-24.583	11.938	13.358	-13.34	4.0253	7.7107	11.538	-12.731	8.9592	0.32908	14.429	-2.279	6.7462	-0.90857	10.831	0.19362	4.8882	-6.0057	2.061	-3.2884	2.5579	0.1043
1467fwb49	white british	30-49	f	2264.23	-53.152	-100.73	-83.616	24.072	-20.012	15.54	24.218	-26.61	-25.281	-18.496	-20.305	3.2928	-12.995	15.854	2.6429	-6.5231	-4.4221	-2.1479	1.1246	-5.4264	1.0467	4.8471	0.25546	-0.23439	-7.0223	-18.954	-6.4556	2.9473	-9.4005	3.286	2.85	12.003	13.608	5.339	6.3372	13.201	-18.161	0.74972	-2.7373	-6.3736	2.3503	-3.318	5.7551	-8.0818	-7.778
1468fwb49	white british	30-49	f	2309.11	-58.248	28.966	-47.127	-32.872	-53.494	-9.833	-49.968	-29.765	-39.921	-22.254	1.1249	-3.7807	-17.737	-5.9112	-10.81	10.663	-3.565	13.769	2.996	5.8696	8.1684	-6.4374	-16.143	2.6657	-7.2858	-9.968	7.0227	0.82568	-0.083349	-5.1216	6.4676	3.6875	6.9367	-9.7357	-10.895	-2.0645	-11.601	-0.55893	-12.36	-0.34711	0.66272	3.8049	-0.41811	-6.3519	-6.4647
1469fwb49	white british	30-49	f	2259.34	14.177	98.45	12.974	-7.795	-24.479	37.474	-2.4615	-49.158	26.661	-34.357	22.73	10.94	-14.346	1.7105	-31.85	-7.4291	42.324	-13.214	-9.684	14.086	-3.9082	5.1577	13.615	-17.708	0.47786	-2.4829	6.3751	14.058	-5.994	-9.8963	-9.833	27.464	1.8737	-32.81	28.299	-3.3329	-5.0416	-2.0807	16.521	15.913	1.0849	-15.09	-1.3051	7.2866	3.9298
1470mwb49	white british	30-49	m	2419.34	-205.4	-15.745	-12.031	-58.022	-13.501	3.755	4.6676	-25.883	-3.5549	-22.137	-0.90427	31.69	-19.023	-13.726	9.1857	-10.122	-4.312	-9.8697	-2.6831	-22.218	-1.5522	3.5874	6.5247	11.611	-0.62856	-10.014	2.3918	-1.0261	6.6336	17.836	1.2695	6.2936	-2.8388	7.9032	-3.3342	13.24	-0.40647	-1.8182	-2.2728	0.41956	0.8195	-5.2786	-2.509	-3.3699	-1.4499
1474mwb49	white british	30-49	m	2287.36	-72.483	-22.973	-52.857	-18.463	0.78847	40.053	-4.1193	19.599	-19.643	10.042	-9.949	25.9	-15.452	-18.615	28.136	-3.0255	-10.439	30.254	-8.0931	10.75	-14.057	-1.5881	1.7577	9.0664	16.633	-15.135	-6.4184	14.075	4.3943	0.51621	-5.2915	10.129	8.8692	10.157	-2.5424	-4.1016	0.68847	21.441	-5.6095	-8.1161	1.056	-2.804	-10.549	4.0797	4.9539
1477mwb49	white british	30-49	m	2442.47	-228.76	-7.682	-14.926	-40.608	-47.231	0.22766	50.8	27.555	-12.203	1.9245	1.0399	-31.315	-0.91577	6.8407	11.32	11.364	-16.977	32.368	11.095	21.655	0.22129	-9.5003	6.2191	5.5645	11.549	19.099	-2.9791	25.566	12.622	-9.9779	-14.088	-13.744	-15.532	13.974	2.6329	-4.0159	-11.096	-4.8298	-6.2961	8.7401	2.3294	-25.536	9.9579	2.1591	1.0958
1483fwb49	white british	30-49	f	2253.54	-51.296	-103.66	27.213	24.281	-34.986	42.902	13.338	94.694	2.5169	-21.989	-17.575	26.695	1.151	-60.671	32.875	-10.823	8.7512	-7.4753	-3.4932	8.9147	-4.1889	-25.671	30.66	5.0265	12.438	3.7986	7.7171	-25.093	-4.4336	2.399	0.53836	-5.1308	-8.7867	-2.5865	-6.7421	6.9239	9.1397	-5.6377	6.5793	13.395	1.8922	6.4535	-6.7159	-5.8732	9.0052
1485fwb49	white british	30-49	f	2226.1	34.274	129.44	-67.242	47.781	67.667	-30.87	-45.3	72.018	47.471	3.6726	38.146	-15.964	12.052	1.9423	-8.764	-50.473	35.623	6.1535	-9.5532	27.783	-13.495	-5.9286	-15.581	3.4719	16.454	-30.936	-3.8404	1.3445	-6.7888	-16.44	-17.916	-0.76782	-18.34	3.1865	-2.7042	16.082	-10.156	-1.6143	-4.7976	9.3012	5.1195	11.708	4.8326	-3.4051	7.3846
0012mwi12	white irish	12	m	2034.12	226.66	11.199	-18.358	-48.062	4.2883	26.118	13.203	-39.372	-3.4574	30.407	20.046	23.093	-1.6169	26.205	20.307	2.6999	-9.3133	11.585	13.884	7.7644	-6.3491	15.754	-0.16634	21.92	-0.745	-10.204	-4.6882	3.2416	3.3842	2.6323	3.4099	11.775	2.2189	-6.8727	-1.3185	10.32	-10.248	-1.6052	-5.1794	3.3091	16.964	5.4001	2.2529	0.065695	-2.8025
1322fwi12	white irish	12	f	2102.39	141.3	-41.513	-8.1602	-2.8881	-20.775	19.864	-16.586	5.6554	-4.238	16.067	-9.5508	-14.535	21.503	-9.993	-2.3598	17.715	12.26	24.631	-19.159	-11.655	9.6804	15.797	3.1526	14.754	6.0856	-18.858	12.739	-0.15638	10.423	8.252	15.305	8.5812	-0.25768	3.3097	0.39501	4.7692	-4.8309	-11.238	-10.279	-0.18167	-11.135	-5.4721	-9.7207	-4.0532	-12.589
1110mwi50	white irish	50	m	2415.78	-194.08	26.39	-77.073	-1.584	14.246	-0.79695	19.371	-47.24	26.659	-24.25	-19.145	24.575	-0.97054	-20.123	-22.347	-29.002	-18.701	31.386	5.3856	-3.7977	-7.4811	-11.886	1.2612	5.9573	-4.2109	-19.099	-4.5298	9.3412	-1.2055	2.8204	-10.79	-16.206	7.9514	0.95783	12.488	9.3134	-0.12918	3.8492	8.9512	-11.621	-0.12589	3.0654	6.8376	0.97635	-9.1164
1351mwi50	white irish	50	m	2493.71	-280.87	-111.55	-196.27	158.78	15.572	38.144	27.016	-36.981	95.063	10.232	-34.488	-21.493	54.957	44.561	38.204	25.385	-39.647	32.013	59.136	-19.189	-21.441	8.0652	-30.574	-40.845	12.795	35.266	57.368	-10.975	22.389	0.18292	-0.053574	-15.007	-2.2561	-13.662	-6.6817	16.838	3.9843	-11.762	17.8	13.059	7.3604	3.5507	-7.5284	-5.2847	-9.761
1362fwi50	white irish	50	f	2387.32	-203.86	-162.71	54.909	-1.0568	32.155	39.502	17.634	-9.3093	-36.114	1.0833	13.778	55.784	5.3823	14.327	-7.4891	-14.48	19.994	13.498	-8.8207	0.98808	-5.9517	8.8953	-0.27581	9.6058	-35.245	8.1872	20.448	-15.177	-3.1385	3.8062	-2.027	-2.9147	5.9782	-6.4116	-1.6577	0.57682	-11.738	13.98	-13.407	8.9958	-8.8796	8.7977	0.68739	-2.1085	-1.1065
1492fwi50	white irish	50	f	2250.42	34.28	220.19	-2.6591	80.191	38.8	67.723	19.762	88.795	-25.59	-10.294	-0.82037	19.741	-33.799	71.97	1.606	-3.7517	-11.965	-25.143	-5.8786	-13.09	-0.10861	21.048	27.101	37.928	-8.9882	24.974	8.5282	-23.788	-7.7419	8.8609	-5.2666	-14.678	-7.2631	-7.4982	-4.0332	11.392	-3.246	-7.0778	-2.3685	-13.006	7.657	-21.506	-12.775	4.9701	2.0689
1502mwi50	white irish	50	m	2339.45	-78.097	103.13	11.615	37.835	-25.842	14.067	15.156	-25.922	-42.133	-12.905	14.74	14.26	22.017	1.0779	5.3754	-6.3363	0.066838	-25.17	-4.8231	-20.915	12.468	-3.3923	0.27854	-5.2573	-1.2202	-6.325	10.351	1.2377	-1.6436	-0.29298	-1.4381	-3.9459	13.809	10.414	-1.8726	-1.3493	3.6361	-3.056	-6.1596	6.1875	0.47884	-6.7324	-7.0607	7.1032	2.5242
1503mwi50	white irish	50	m	2299.49	-101.17	-111.43	-21.787	26.692	77.502	44.604	-19.748	-64.536	28.681	-48.689	-2.7876	34.743	-9.3291	-8.7829	-8.2156	-27.36	8.3611	0.50478	1.0578	-7.0078	-5.6045	1.1034	6.6353	-7.8492	23.256	-1.5991	-19.502	9.8634	7.75	18.864	1.4789	-1.0278	11.226	6.9104	-4.9935	-10.276	2.5122	10.882	-1.9122	-5.9413	7.0407	-8.2638	2.4355	-0.36646	-11.284
1504fwi50	white irish	50	f	2334.23	-123.09	-14.964	-20.644	16.526	23.644	16.303	15.577	28.361	8.6507	-0.98367	28.074	28.764	-6.7286	-21.001	-2.5549	6.3454	-49.452	11.782	-12.137	12.423	4.9095	-11.597	-11.77	19.276	-14.277	15.68	-0.33202	-13.52	19.845	8.1318	24.739	28.038	7.1343	-18.378	3.0807	2.839	19.336	22.053	7.2352	0.57498	-4.4697	-1.2222	5.5056	3.074	29.564
1507mwi50	white irish	50	m	2328.91	-109.01	-28.994	-6.6228	-19.971	-28.824	45.309	29.399	-10.812	-27.96	2.5118	-24.838	10.463	-14.908	-13.491	0.79471	-5.1043	12.405	11.864	-15.539	3.1537	-2.9873	11.301	-1.3701	-4.4799	-1.0865	2.762	1.7139	9.6802	11.712	5.0191	6.7106	-4.5588	-2.6841	1.9562	-4.5591	1.0258	8.7697	-2.415	2.0815	-6.9468	7.9824	-0.6094	0.48023	-1.5568	5.4872
1512fwi50	white irish	50	f	2352.25	-92.373	99.789	64.645	-5.3196	-40.448	-8.3771	31.73	16.146	55.781	-44.405	7.0516	-20.556	-13.732	32.19	41.355	2.3834	33.511	22.651	4.6323	-9.4021	7.044	-10.095	16.917	-16.593	-14.413	8.4703	-20.584	-9.4711	-4.4882	-0.034185	7.0075	16.992	3.2808	6.593	-6.0334	-5.0352	-1.6467	1.5537	-2.1398	-2.6552	0.40227	5.6826	12.181	7.0367	5.8222
0076mwi49	white irish	30-49	m	2245.92	-30.757	-124.38	-5.9705	14.781	-20.385	-30.479	14.026	-21.698	12.489	16.809	17.816	-9.8144	14.697	17.108	-7.3827	6.6645	-2.1839	-23.01	-5.1279	-21.111	-5.9672	-15.725	-3.8523	1.8435	1.46	-15.916	-4.9844	5.5628	6.3087	14.17	-3.2641	-2.2679	-2.9503	1.7884	-18.704	-9.9317	-7.2378	-7.8953	-5.6471	3.8101	1.5046	-9.7187	-2.939	-8.0265	3.1521
0097mwi49	white irish	30-49	m	2394.05	-168.01	-9.9712	10.795	-4.1588	-22.632	21.974	-25.201	-25.968	-11.836	-6.0504	13.207	15.822	12.472	-20.86	-16.612	16.001	-6.3552	0.21657	-7.1998	-33.85	9.6133	-6.1873	-0.41157	15.632	9.241	-5.6318	0.31504	4.5257	-3.2155	1.8139	-4.4495	-0.43098	5.519	3.0773	-6.0482	-7.3077	2.1577	-5.7812	5.6428	-1.6932	11.609	-9.6616	9.8124	-4.467	-1.1032
1237fwi49	white irish	30-49	f	2284.78	-46.996	16.893	-1.3274	-12.635	11.042	-23.673	-39.435	-1.9622	23.634	4.007	41.994	-7.4937	-9.0888	-6.3371	1.315	18.172	8.6375	3.3669	24.638	2.2588	-1.6656	12.911	19.154	14.018	-0.32603	-11.099	12.899	0.6525	7.3269	-1.8824	-0.49086	-11.021	1.9897	8.2178	-6.7181	11.003	3.3275	2.9326	-5.5755	-6.9344	1.8151	5.4378	-13.433	-8.2583	0.57779
1290fwi49	white irish	30-49	f	2207.38	30.653	-0.81165	-19.156	-17.688	-26.183	39.317	-15.758	2.6886	-43.542	-8.5844	11.589	-3.1413	-21.918	3.395	-14.341	30.408	-14.133	-5.6515	23.346	7.8302	16.562	1.9315	-10.091	4.4563	5.2847	1.3476	-9.3711	5.2644	4.8821	-8.1347	-17.473	0.6539	2.0239	-6.3303	3.5882	10.003	5.036	2.0117	10.105	-5.0311	-4.9869	-1.0783	-4.7311	-16.184	1.4278
1370fwi49	white irish	30-49	f	2190.45	26.134	-106.11	18.83	-0.22614	8.1088	-45.155	-19.47	8.1986	-9.7573	11.244	21.384	20.587	-11.63	15.388	14.563	-2.9563	-9.4871	-5.1765	-11.554	-21.12	5.0839	-9.8294	-7.525	13.466	-2.8931	-2.3178	0.88813	-12.595	17.488	-11.842	3.4461	-5.263	-2.5842	-9.7161	-5.4391	5.562	-10.231	-6.5942	4.2427	-6.7662	9.9633	2.9957	-12.568	-8.1529	-4.6799
1420mwi49	white irish	30-49	m	2368.04	-120.01	75.87	35.471	-23.623	-52.857	19.555	-0.56418	35.639	-5.801	-25.809	-0.11081	-31.135	20.751	-7.2494	10.437	6.5067	-4.3865	4.6185	-2.7575	-0.45182	16.305	3.3894	-19.395	3.5357	1.8247	-1.3902	-3.2539	-1.179	-19.219	13.839	6.1255	-2.8389	-14.934	-4.0262	4.939	1.5307	8.1987	6.283	1.8919	7.7625	-2.7382	6.3463	-4.2045	-5.6037	8.1488
1422mwi49	white irish	30-49	m	2383.66	-144.08	40.532	-34.516	9.7582	-31.769	-1.1572	16.473	-32.411	-12.809	-8.7266	-15.584	-27.696	9.3375	-3.3888	-8.252	8.1833	4.4633	2.3638	-5.2898	-8.305	-3.2437	6.032	3.5469	-6.5369	5.1589	10.066	-5.7152	-1.1007	-1.7084	-6.2637	-2.2017	-5.6122	3.4168	-2.1159	12.632	-5.0613	1.6405	6.0577	-7.8904	-5.1126	5.4897	1.3535	9.3971	0.94625	1.5426
1427fwi49	white irish	30-49	f	2235.72	10.109	32.665	22.437	-25.701	-23.15	-8.5733	3.2665	-2.7069	-33.423	-45.548	34.835	-15.036	-7.3141	6.9127	-5.533	9.2772	-11.81	1.2105	-2.9204	9.2018	8.0522	4.8245	-11.973	16.247	-0.56705	13.356	7.2438	11.286	1.9447	1.7972	0.0019358	-2.5341	9.4091	-5.4546	-1.7306	-0.73962	0.50568	7.0445	-0.69976	1.026	-7.4818	-0.0055389	-0.61635	-3.3591	-0.65771
1430fwi49	white irish	30-49	f	2156.19	105.51	63.09	-45.297	40.926	17.682	-31.675	-108.31	95.439	26.381	21.596	-8.5596	39.86	-15.835	21.393	-10.125	-2.5222	-51.171	19.627	21.344	-43.223	19.573	49.16	47.857	-38.475	-45.868	27.091	-13.163	50.203	28.636	0.25168	11.257	4.2768	-9.9789	2.0366	-7.174	-21.019	5.3709	6.0024	-1.847	20.556	3.1223	2.2505	-5.7535	2.134	2.8566
1476mwi49	white irish	30-49	m	2330.47	-91.064	73.2	-32.603	-6.8299	-1.7842	36.525	-1.0914	9.5519	2.3747	8.0461	-27.838	-6.4866	1.8127	-3.4232	9.7761	8.4714	15.732	14.034	-4.1471	-20.229	17.791	-7.3965	9.3723	-5.8327	-3.0307	-9.1059	-1.4486	1.0422	-5.2704	8.4524	-7.5661	-0.56459	8.3093	3.4787	-0.56782	-7.0048	-4.5096	-1.453	-11.008	5.2048	-3.9763	-0.97882	4.1172	-1.1854	-2.0648
1480mwi49	white irish	30-49	m	2480.54	-272.62	56.746	-36.268	68.611	100.22	-8.053	11.405	37.257	62.112	-50.932	-53.151	-11.312	22.715	-46.743	34.187	26.967	-12.843	-55.334	17.273	8.1382	-1.9586	4.6148	2.3926	2.1081	4.082	1.8741	2.2733	-11.018	7.9295	22.05	-11.504	-4.5129	-18.899	-7.4529	12.834	-9.8631	-0.26681	0.24355	-7.251	0.40691	-6.5833	15.173	-1.2539	-2.383	-3.4035
0177fwi49	white irish	30-49	f	2314.32	-57.766	15.365	188.49	11.432	-39.613	-3.4178	-46.044	49.054	34.841	-32.927	33.434	12.721	14.853	-1.2563	4.4564	51.701	10.673	18.996	15.953	3.4195	3.0742	14.874	-25.329	14.793	-17.174	-24.018	5.3955	3.184	-3.3961	-7.8231	2.2802	-16.1	8.3826	11.023	1.0693	13.693	-18.572	-15.45	13.609	-12.742	3.685	8.5044	-11.526	4.8878	0.4809
0179fwi50	white irish	50	f	2184.76	69.065	54.121	72.863	-48.702	-44.551	-1.827	25.495	26.643	-25.692	-65.025	12.926	3.7205	13.471	2.7021	-4.4297	-14.261	-0.99278	-0.4763	16.917	11.734	-12.13	-2.6511	-17.539	-10.58	-20.621	7.4715	2.2587	8.3167	-2.4364	1.4143	6.8027	-2.8665	-11.234	-7.289	-1.9629	7.5429	0.82772	4.6402	-13.532	-3.0688	3.2589	-3.2301	-0.62638	1.196	-1.7971
0180mwi49	white irish	30-49	m	2305.86	-66.076	-18.245	47.856	12.225	-22.253	57.16	-52.423	-1.5054	-12.038	23.247	10.434	17.24	-9.2373	-4.62	-20.783	-1.4943	9.9585	-22.423	-16.735	17.802	-17.282	27.195	-7.7128	-23.272	33.799	7.79	0.040275	-10.055	11.977	-0.4508	-1.4961	16.297	-3.4294	23.241	10.741	-0.34937	-4.5277	-11.881	-2.9799	23.8	14.056	-4.1538	-3.4161	5.2735	-17.563
0207mwi49	white irish	30-49	m	2411.9	-167.4	64.283	75.479	-59.875	-67.114	65.323	17.19	7.0303	4.5875	-22.912	50.091	18.485	4.5844	-12.039	2.5977	20.808	-11.774	-4.3078	11.37	-14.881	-2.7841	11.612	-2.4227	-5.5266	0.90457	5.665	-21.253	1.2085	-6.9271	7.7076	-2.7111	7.072	5.7018	-2.2517	-11.727	-11.991	-2.47	3.8204	5.4705	-11.294	-3.0501	-20.716	-3.3297	8.9647	-4.1677
0218fwi29	white irish	20-29	f	2269.06	-20.995	42.096	26.434	10.076	-12.848	64.312	-13.502	37.631	32.072	29.142	52.142	-36.975	21.399	-17.939	19.852	9.3023	-21.637	6.5143	28.934	5.5434	3.5208	-30.267	2.1216	21.825	-17.895	0.96781	28.836	14.58	-6.7334	-26.701	-23.357	9.8678	18.03	2.2476	-0.53693	4.328	11.089	24.025	0.53149	-8.539	-27.39	10.701	-6.4171	9.0724	-9.0945
0222mwi29	white irish	20-29	m	2390.8	-172.78	-84.094	-12.649	73.679	-66.947	58.329	21.029	32.621	68.487	-1.6739	10.564	40.069	-21.121	0.047749	-39.878	21.703	-17.405	6.2108	-39.618	2.6042	26.11	-10.554	-16.557	-25.862	16.792	-5.8991	-29.557	-22.417	38.033	-31.727	2.9797	-15.985	2.245	-14.363	19.844	-7.4892	-8.3352	7.1512	-28.139	-7.0471	4.0101	1.987	-22.061	-2.8921	-22.981
0268fwi50	white irish	50	f	2178.12	80.837	3.3878	87.828	-22.236	-39.394	25.168	-11.901	-2.1787	49.648	-27.393	3.1299	1.0618	-29.444	46.581	-27.899	-15.002	0.54691	15.017	-2.9317	9.0862	0.18801	-14.545	13.17	-0.23721	19.422	17.052	1.8446	-4.0926	1.2638	-10.743	-1.8497	7.5926	-7.8651	-9.2819	-7.4312	8.1332	-3.6339	-0.21854	-1.5889	-5.3045	0.23353	-4.3925	-3.5015	-4.4895	5.3405
0273fwi29	white irish	20-29	f	2252.65	-11.915	-18.431	59.103	-25.511	-19.779	17.584	-34.51	8.9516	30.58	0.5735	18.301	-29.179	0.38199	-9.4069	15.466	22.184	24.862	-13.175	13.754	3.2411	-10.501	-1.1698	-11.954	1.6128	-14.59	9.0655	9.7222	15.216	0.43299	21.856	-12.918	19.402	5.0948	-17.769	7.0154	1.6942	-14.32	16.474	3.9174	0.14448	12.991	-16.807	-4.1443	4.6411	-3.5964
0274fwi50	white irish	50	f	2308.6	-90.582	-105.59	39.833	35.641	-17.452	-22.676	19.803	-17.337	62.641	-9.8498	1.0732	8.9872	7.4049	-19.02	-19.444	-5.7363	31.69	16.158	6.1626	5.3554	26.849	-16.213	-4.3549	0.16495	-9.2332	4.9988	8.6991	-23.009	16.28	-4.6266	-5.4654	1.0979	3.8887	3.1004	-0.015129	-11.608	6.4152	3.1098	10.43	9.6344	-9.985	10.588	18.179	3.3766	10.856
0279mwi29	white irish	20-29	m	2336.19	-130.81	-87.515	31.256	-39.297	-10.006	2.691	-7.2338	11.858	-31.033	8.8503	-29.279	-14.981	-1.1401	13.583	-11.832	-28.075	-5.7323	32.562	2.3615	17.551	3.2758	-8.7715	4.4906	-0.26372	9.917	-5.8332	-13.416	-2.0461	2.0508	-0.85734	0.57104	-3.252	-2.5409	3.5648	4.0837	-2.3994	-4.1401	-16.479	5.4078	6.2606	1.5986	1.9974	0.92105	4.7203	15.285
0282mwi49	white irish	30-49	m	2354.29	-131.01	32.979	4.045	-45.813	-5.353	3.189	10.718	-0.95385	-28.507	-20.28	-6.6995	15.848	13.23	-12.755	-15.569	-2.8243	-16.956	9.4918	15.213	-8.1404	9.334	-6.8497	-6.4499	12.25	-6.8069	-15.376	-16.295	2.1117	2.541	12.072	-5.5469	3.8016	-4.8948	-2.9945	-4.053	-6.6367	-3.8801	-6.7144	-2.6005	14.607	3.0183	2.4575	1.336	-7.2345	0.96796
0292mwi49	white irish	30-49	m	2341.58	-84.015	98.124	59.145	-49.686	-30.452	-36.572	-3.787	-4.4337	12.501	-27.003	-20.929	28.363	-3.5031	16.186	-16.227	-19.431	19.81	3.5737	33.261	-4.5706	0.84503	-16.947	12.85	5.8473	13.735	5.5667	0.68943	15.924	2.4728	-10.674	13.868	-3.5902	-7.0863	-4.604	-13.63	9.8403	5.6307	8.1072	-0.70359	-3.1522	-1.2417	-3.2741	-7.1468	-2.6037	-7.798
0301fwi49	white irish	30-49	f	2190.36	32.226	-69.619	-23.342	31.588	-35.002	-49.008	-0.49149	55.31	-6.1943	-3.5304	16.422	7.5079	-19.418	-5.3898	-30.197	9.1804	11.664	6.7628	24.425	1.6186	1.4751	9.4247	20.723	16.908	10.801	-7.299	-5.561	-10.707	16.465	-8.5989	-8.043	5.8558	-21.58	20.503	7.2953	16.426	-18.608	-4.0664	2.7885	7.3226	-2.4637	-1.3247	-1.694	3.6522	-1.8399
0307mwi29	white irish	20-29	m	2227.3	-0.00056277	-14.637	38.678	-11.059	13.402	70.849	13.755	4.4864	3.6674	5.6231	-14.392	-43.353	-19.101	7.753	-11.576	5.7757	11.399	10.027	-11.36	-1.8214	-3.476	-1.3279	8.3031	-5.7425	-13.753	-9.9344	-5.552	4.1941	-4.0318	8.4068	4.3132	-1.8326	6.1056	6.9541	-7.2102	-2.4495	7.2634	-7.4405	-14.718	5.1825	12.536	-0.93292	1.8928	2.8997	-4.5084
0308mwi29	white irish	20-29	m	2356.91	-146.23	-133.21	37.8	-22.873	-5.8477	20.359	-48.825	-35.837	-42.184	33.651	30.636	-19.919	17.07	26.185	-2.3174	-12.61	-7.886	2.9529	20.486	-3.1319	19.873	-8.76	-5.0646	5.8952	22.562	-4.4663	-8.5096	-6.0488	-12.79	1.5779	14.284	14.176	-11.723	11.873	-11.204	-18.178	-9.5577	-6.3529	9.986	-7.9234	-11.988	-10.111	4.0128	17.726	0.70113
0309fwi49	white irish	30-49	f	2081.53	123.54	-143.86	54.995	-21.565	34.318	65.745	35.669	7.1199	-17.883	33.975	16.546	-5.0929	9.0859	19.2	-10.926	6.5157	-2.0819	-3.5185	-0.12288	-15.442	-1.0644	24.343	-4.1916	2.9064	0.057377	16.268	-4.527	-16.412	-16.031	-4.8057	-8.4297	-0.44927	13.259	8.897	-5.7715	4.0503	17.573	3.0428	8.8745	10.353	3.3784	-3.3373	9.8905	8.1406	-6.4803
0310fwi19	white irish	13-19	f	2211.13	100.72	109.45	-8.3227	139.19	-88.957	-86.153	-65.913	124.12	83.272	43.334	52.056	2.5577	28.846	-9.3901	-17.208	10.441	15.908	7.2361	-4.2102	15.257	6.1547	69.918	-0.90872	7.7277	26.37	-32.681	-18.57	7.9594	-0.94656	15.609	11.599	-21.905	13.087	-6.5322	0.3898	20.538	21.792	8.8628	-12.855	-7.8159	-0.49603	-20.319	24.095	11.63	1.5567
0318mwi49	white irish	30-49	m	2305.5	-63.033	-4.8237	17.252	-94.74	-62.071	-4.286	28.443	-29.137	28.246	46.128	3.0015	1.9601	31.95	-6.1662	-16.962	1.2597	-19.664	14.193	9.9899	-5.783	5.0853	14.16	7.7541	7.4415	-9.4261	6.3447	1.2446	-8.2024	-4.4351	-11.611	-21.942	4.6476	-7.8981	-0.87045	1.9937	-3.8055	-2.5448	-2.2232	-1.7047	6.8733	1.8144	1.0488	0.020128	6.9379	6.4426
0326mwi49	white irish	30-49	m	2355.58	-125.46	-74.964	129.4	19.182	-39.605	-25.273	42.366	-22.033	45.658	-16.035	-41.95	18.571	8.4935	19.179	18.57	10.372	-14.311	-21.731	11.155	1.6897	19.172	8.0378	5.1994	4.2881	26.978	-9.6431	6.4444	11.994	4.7525	-14.602	10.885	-13.895	10.544	-3.0875	-0.31176	-13.128	-4.8531	3.6689	9.2167	-2.3574	12.841	0.57343	13.303	-4.1959	2.2835
0330fwi50	white irish	50	f	2299.81	-65.532	-50.45	38.172	-27.589	-41.624	38.402	-80.738	48.403	-5.0574	74.73	-15.671	21.814	-9.3875	31.932	13.257	-10.865	6.4294	24.078	7.4034	-25.259	-16.995	-5.5868	-23.56	-10.947	-2.9691	10.089	15.665	-23.991	27.843	-24.02	-16.55	4.8405	7.079	-16.974	0.60492	-16.865	10.027	4.1932	-14.909	-28.266	0.41708	12.302	5.9962	-3.5112	26.807
0332fwi29	white irish	20-29	f	2278.03	-23.02	2.2104	5.6964	-23.614	-96.635	42.274	-56.138	45.906	14.122	39.699	-11.905	9.2493	3.1494	40.042	2.8262	-36.313	-0.27443	8.716	32.674	-19.728	-20.475	1.7416	-29.891	-18.004	0.88627	-29.617	-7.9548	-23.082	28.141	-5.5509	15.602	19.073	-6.9167	-7.4265	20.836	-2.2129	32.484	0.48458	-16.581	-6.7002	14.2	9.2683	-8.0635	4.7724	19.999
0336fwi29	white irish	20-29	f	2222.12	-16.861	-139.74	-22.009	-38.691	-40.117	50.275	21.885	29.075	-26.675	1.2038	-27.171	-29.944	-16.122	-36.492	-3.2251	-10.48	28.213	-2.1704	-18.611	4.1465	8.3254	2.1686	-9.9663	-3.1289	-17.43	11.18	19.5	-9.0341	4.4807	15.597	-5.2258	17.436	-13.116	-29.312	5.708	0.42098	-13.079	16.604	5.7998	3.9537	9.4378	-13.628	-1.8647	-3.9538	3.1315
0337mwi29	white irish	20-29	m	2436.73	-212.89	-23.399	-45.654	8.1508	-50.352	-37.109	11.553	-8.5518	0.20019	37.097	14.269	-7.2867	50.769	1.2538	7.1423	-11.102	3.3861	13.322	8.4938	-2.8211	-7.0089	-5.1345	1.7508	8.2799	-4.05	13.213	-13.79	-5.0403	-8.7503	-7.3337	5.9012	-0.36021	-4.3381	0.14879	0.9687	-13.171	-7.3413	-2.7244	-9.1025	9.8969	-6.3709	-3.8141	-1.9172	-2.9679	-4.1679
0343mwi49	white irish	30-49	m	2339.42	-130.06	-89.986	37.98	-53.505	-1.0721	-17.886	12.027	-33.76	30.923	10.407	-11.007	-8.6872	-9.5817	10.081	-19.153	-15.942	-2.5455	18.499	7.5884	-8.2684	-20.271	-4.6488	-13.435	6.3917	21.477	3.2645	-6.6062	11.78	-0.63105	-1.7333	31.696	-2.1345	0.15864	5.2114	-0.1215	-1.3576	-1.3352	-4.2407	-11.162	8.6075	-2.9886	-3.8432	-5.1584	-2.4746	-1.8643
0356fwi49	white irish	30-49	f	2159.77	50.975	-110.05	-3.8063	-15.994	-5.8732	-2.5669	-20.562	27.775	-56.952	-5.1249	20.133	7.4044	-9.1159	-5.0875	-1.6404	-3.1408	-5.097	-20.597	2.5512	-3.83	-13.884	12.568	-17.991	16.058	-2.5204	15.489	7.1058	6.294	2.4183	3.0193	-0.32969	9.8956	9.2669	-11.533	4.0704	7.2324	0.55311	1.4471	6.8983	-6.9229	5.8694	-2.1327	-7.0726	-6.5742	-12.921
0365fwi49	white irish	30-49	f	2163.68	41.276	-156.15	-17.71	9.756	11.499	3.1327	-57.677	53.503	-0.48703	13.024	2.6175	-50.552	-34.829	-16.664	-57.956	-18.832	19.57	-13.169	21.942	2.6251	-10.629	9.1407	-10.357	-6.7938	-5.2201	-8.4089	-3.7084	10.226	-5.1401	15.74	-0.43335	-8.2278	-13.048	-12.778	31.277	-19.354	-10.756	-11.843	24.314	-5.8009	-13.641	7.2813	-26.606	8.7341	8.0783
0384fwi49	white irish	30-49	f	2226.49	14.178	7.8523	68.371	-27.3	8.2314	29.893	-16.031	-7.5569	0.31901	7.4478	10.115	-12.033	21.932	9.4172	7.4393	-1.101	-14.717	-21.376	16.29	10.252	10.525	-1.1783	-8.5429	8.8361	-6.8432	-22.69	-2.7655	5.5458	-9.6062	2.1036	0.060285	6.6981	-5.1617	-10.053	0.93623	-8.245	1.1179	-4.4095	-6.3884	3.3332	5.2543	3.2006	-0.74147	1.698	3.1822
0386fwi19	white irish	13-19	f	2214.84	15.748	-42.401	31.007	15.714	-2.8792	-15.841	5.5263	14.421	42.79	3.4201	-18.341	-25.571	-32.678	15.457	-27.238	-19.324	-48.101	-2.0309	-16.127	9.3174	20.775	-6.1208	-25.136	4.0329	-18.429	5.7022	-11.11	4.2526	-7.6207	4.244	14.401	-3.6769	-10.788	-17.476	1.4672	3.6458	0.40448	-2.995	-19.607	-5.4059	8.479	-7.0342	0.8272	0.34976	3.236
0389fwi29	white irish	20-29	f	2214.59	-0.0078732	-141.11	17.91	19.368	11.862	46.455	-60.051	-0.2332	4.547	-13.971	-48.597	-54.591	17.298	9.1988	-6.3508	3.2976	25.927	4.8844	-4.002	7.1177	7.1251	-0.1503	-12.278	29.657	0.40151	12.3	15.095	6.2354	2.941	-11.706	-0.11307	8.8971	-9.6693	-22.893	-7.0863	-4.0963	-3.1378	4.9261	10.067	-20.067	9.3419	1.0032	10.713	18.433	-2.8634
0391fwi29	white irish	20-29	f	2264.47	-37.901	-259.36	81.81	20.232	-120.79	-38.903	-3.8852	0.39748	-21.317	-42.252	-11.177	-44.575	-83.012	58.999	32.412	-0.27312	-16.499	-8.3687	1.0766	-38.085	-15.464	0.72178	30.154	-1.3364	6.2798	-23.454	-9.8305	-0.54647	-11.726	19.892	0.67658	-3.8307	-24.874	-14.937	11.556	-3.5506	2.2652	-0.44529	-18.255	-2.8391	-21.297	15.6	17.799	11.38	-4.5816
0396mwi49	white irish	30-49	m	2432.31	-206.48	-15.734	30.286	-55.825	-53.442	37.778	-11.37	-4.955	7.3204	12.424	-19.064	-0.012774	20.916	0.6836	1.3191	-21.719	-13.918	-23.039	8.0246	2.7379	-10.607	16.22	11.339	11.009	-4.5072	-11.604	7.9369	-3.2665	-3.184	-13.187	-2.7604	-14.25	3.5087	-10.793	-0.47264	2.0204	3.1712	-1.9762	-1.3078	19.724	6.5024	-8.2519	-8.6131	6.4518	-7.2967
0399mwi49	white irish	30-49	m	2479.66	-274.56	-97.32	28.633	62.704	-31.368	29.821	8.8693	0.53381	24.325	-44.613	-2.5779	-24.191	3.9098	-22.474	20.79	-10.452	-12.528	-33.525	-11.765	14.757	9.1713	10.906	-23.305	-14.245	-18.563	-12.809	-3.6179	6.6722	-9.0705	-21.907	-3.882	-2.5506	9.4152	-0.24568	4.6464	-1.4176	-9.299	-0.20667	-0.92653	7.7359	-0.59236	3.3025	-4.1722	-3.8545	3.9874
0437mwi50	white irish	50	m	2402.98	-225.11	-153.93	48.806	-9.793	24.647	38.191	8.7721	26.726	9.0569	-14.587	-7.1441	14.307	-20.415	-36.954	18.495	15.839	3.8927	3.7453	-29.224	-27.875	-9.7627	6.8582	-4.7218	4.6359	5.2366	0.38009	-4.6799	11.926	3.186	-13.781	9.8539	-1.364	-6.9812	10.122	-4.2285	15.864	1.0853	3.3076	8.9618	-2.0598	-8.3914	-5.1404	1.8638	1.4899	-3.2737
0449fwi49	white irish	30-49	f	2205.97	20.656	-90.088	80.173	-43.42	-19.774	-10.525	23.333	4.4521	22.528	40.785	-29.648	-8.9043	-18.729	29.764	24.812	-9.6598	-1.8643	1.8785	14.368	13.346	26.042	5.7623	2.4524	-7.0171	10.053	7.7327	8.9603	-4.1413	-26.473	-12.167	-4.495	6.859	9.2561	7.0562	9.0498	0.086605	-0.67897	1.7772	-3.3459	16.357	4.3294	-7.1737	-1.6695	11.293	-3.6427
0473fwi49	white irish	30-49	f	2315.44	-90.164	-37.648	-21.22	-28.496	-58.751	-75.25	35.953	32.205	24.144	19.751	18.646	-6.6666	-39.258	-35.722	-9.2454	-7.7208	2.5864	-0.86495	17.977	-1.8672	-18.1	10.153	6.7505	-14.436	-2.0458	12.95	-4.5021	-0.63132	5.7175	-10.972	15.951	-0.90225	6.16	23.022	9.845	-1.4662	-5.5563	2.6406	7.6604	-19.905	-10.672	-3.6731	-7.537	-8.7287	6.9382
0492fwi19	white irish	13-19	f	2178.09	59.632	-72.409	40.8	-2.4623	-23.296	9.6883	-41.482	22.412	2.5724	6.1015	26.032	-48.425	-0.62605	3.3103	34.354	-14.804	2.6188	5.0859	-10.389	-5.9879	-4.2627	-2.8901	22.057	-3.3535	3.1387	-1.137	18.17	-11.101	-5.7931	4.1686	9.1854	-4.717	-0.37798	12.804	3.3516	-1.9259	-4.5506	11.618	-5.4475	9.1492	-10.571	-1.3261	-11.069	-10.075	3.4788
0493mwi49	white irish	30-49	m	2344.55	-143.65	-145.28	-3.2077	-57.915	12.453	-46.152	-23.828	-48.727	-29.339	9.3616	8.9056	-18.228	1.3284	-10.637	-12.504	-11.505	-16.308	34.384	-6.1061	1.5754	24.749	-1.6144	8.1854	-9.7214	3.0774	-5.652	3.428	2.2378	-4.5644	11.969	-4.7567	3.0155	-12.883	3.4135	-6.6732	4.5006	4.5093	-7.1703	16.129	1.5696	10.76	-9.4922	-4.4739	15.614	0.96415
0391fwi29	white irish	20-29	f	2264.47	-37.901	-259.36	81.81	20.232	-120.79	-38.903	-3.8852	0.39748	-21.317	-42.252	-11.177	-44.575	-83.012	58.999	32.412	-0.27312	-16.499	-8.3687	1.0766	-38.085	-15.464	0.72178	30.154	-1.3364	6.2798	-23.454	-9.8305	-0.54647	-11.726	19.892	0.67658	-3.8307	-24.874	-14.937	11.556	-3.5506	2.2652	-0.44529	-18.255	-2.8391	-21.297	15.6	17.799	11.38	-4.5816
0396mwi49	white irish	30-49	m	2432.31	-206.48	-15.734	30.286	-55.825	-53.442	37.778	-11.37	-4.955	7.3204	12.424	-19.064	-0.012774	20.916	0.6836	1.3191	-21.719	-13.918	-23.039	8.0246	2.7379	-10.607	16.22	11.339	11.009	-4.5072	-11.604	7.9369	-3.2665	-3.184	-13.187	-2.7604	-14.25	3.5087	-10.793	-0.47264	2.0204	3.1712	-1.9762	-1.3078	19.724	6.5024	-8.2519	-8.6131	6.4518	-7.2967
0399mwi49	white irish	30-49	m	2479.66	-274.56	-97.32	28.633	62.704	-31.368	29.821	8.8693	0.53381	24.325	-44.613	-2.5779	-24.191	3.9098	-22.474	20.79	-10.452	-12.528	-33.525	-11.765	14.757	9.1713	10.906	-23.305	-14.245	-18.563	-12.809	-3.6179	6.6722	-9.0705	-21.907	-3.882	-2.5506	9.4152	-0.24568	4.6464	-1.4176	-9.299	-0.20667	-0.92653	7.7359	-0.59236	3.3025	-4.1722	-3.8545	3.9874
[truncated: 255 more columns]
