# Supplementary material for: Morphometric approach to 3D soft-tissue craniofacial analysis and classification of ethnicity, sex, and age
Source: PLoS One. 2020 Apr 9;15(4):e0228402. doi: 10.1371/journal.pone.0228402 (PMC7145022; doi:10.1371/journal.pone.0228402)
Supplement: S3 Data — (XLSX) [file pone.0228402.s003.xlsx]

## Sheet: eucl dist
ID	Age	Sex	5--19	5--7	5--16	17--18	1--4	2--3	7--8	9--10	11--12	13--14
0003fwb12	12	f	2.29335	1.67294	2.18459	2.17188	1.91408	1.56421	1.5427	1.3837	1.56965	1.119
0008fwb12	12	f	2.28875	1.61754	2.17568	2.19631	1.93984	1.55767	1.52952	1.32598	1.61328	1.23149
0011fwb12	12	f	2.25909	1.68458	2.18674	2.17304	1.89795	1.5102	1.57698	1.40187	1.55479	1.1822
0018fwb12	12	f	2.26604	1.72284	2.203	2.17049	1.86093	1.45448	1.62435	1.33173	1.61869	1.08889
0064fwb12	12	f	2.27943	1.74792	2.21929	2.17381	1.90294	1.55109	1.58564	1.27492	1.50711	1.31046
0081fwb12	12	f	2.28586	1.69638	2.15807	2.13502	1.8899	1.54109	1.51293	1.29888	1.61253	1.10774
0101fwb12	12	f	2.25842	1.69664	2.1559	2.13221	1.86141	1.51831	1.5335	1.26434	1.61646	1.13676
0104fwb12	12	f	2.26538	1.68685	2.14258	2.0975	1.87746	1.47735	1.51679	1.276	1.61844	1.05583
0122fwb12	12	f	2.27293	1.72002	2.18729	2.20018	1.95092	1.59842	1.58424	1.28701	1.60472	1.11088
0133fwb12	12	f	2.26263	1.69225	2.1575	2.164	1.87593	1.50754	1.53862	1.27529	1.69086	1.06026
1046fwb12	12	f	2.26027	1.71312	2.1959	2.13298	1.88195	1.60169	1.54834	1.32606	1.46805	1.33253
1084fwb12	12	f	2.22844	1.73096	2.20051	2.18062	1.89762	1.5494	1.63137	1.34386	1.55583	1.10576
1112fwb12	12	f	2.26628	1.78365	2.19018	2.11126	1.90864	1.55301	1.60388	1.34463	1.67247	1.10614
1120fwb12	12	f	2.24105	1.5725	2.11602	2.14629	1.86957	1.49487	1.5807	1.33828	1.57245	1.1258
1122fwb12	12	f	2.27216	1.647	2.16646	2.19522	1.91526	1.58725	1.58272	1.35648	1.53136	1.00119
1174fwb12	12	f	2.28951	1.69859	2.17404	2.14336	1.88463	1.59587	1.59564	1.334	1.50761	1.21908
1175fwb12	12	f	2.29567	1.66185	2.23969	2.2057	1.90205	1.57421	1.6959	1.36403	1.64329	1.29375
1281fwb12	12	f	2.26624	1.66746	2.14482	2.12766	1.90074	1.52041	1.55056	1.30967	1.57833	1.19596
1282fwb12	12	f	2.26605	1.67088	2.17758	2.15209	1.87451	1.57388	1.63788	1.34785	1.59123	1.12641
1283fwb12	12	f	2.23355	1.66571	2.15311	2.14819	1.87574	1.51474	1.59204	1.38205	1.58904	1.27755
1284fwb12	12	f	2.24989	1.65186	2.17349	2.19294	1.88341	1.53713	1.61918	1.32336	1.56522	1.11027
1316fwb12	12	f	2.27808	1.76769	2.20013	2.16756	1.91223	1.61955	1.59545	1.40469	1.5763	1.29375
1352fwb12	12	f	2.28575	1.72029	2.21235	2.20289	1.93697	1.59089	1.57584	1.32239	1.59115	1.13837
1465fwb12	12	f	2.25066	1.73589	2.18293	2.14279	1.89503	1.56339	1.53932	1.2815	1.62051	1.1663
1322fwi12	12	f	2.27306	1.73463	2.18229	2.12451	1.88037	1.48607	1.54005	1.33796	1.56124	1.09512
0025fwb50	50	f	2.23596	1.65167	2.15159	2.16351	1.8974	1.52411	1.518	1.30064	1.66386	1.02269
0033fwb50	50	f	2.28028	1.60434	2.10028	2.11712	1.85921	1.50202	1.48114	1.26603	1.53069	0.992717
0034fwb50	50	f	2.21659	1.61267	2.11838	2.16671	1.83431	1.4612	1.56115	1.35598	1.63942	1.02716
0084fwb50	50	f	2.25456	1.73904	2.17855	2.13599	1.90183	1.60092	1.595	1.36836	1.56832	1.11189
0901fwb50	50	f	2.19409	1.64119	2.0576	2.07792	1.81589	1.48815	1.41159	1.28517	1.49895	1.00739
1048fwb50	50	f	2.25253	1.75162	2.16768	2.13158	1.8782	1.48065	1.51575	1.3604	1.50081	1.08401
1051fwb50	50	f	2.25294	1.70187	2.15636	2.16771	1.84819	1.4957	1.59639	1.26904	1.62603	1.05111
1091fwb50	50	f	2.29021	1.78853	2.2398	2.16955	1.92393	1.50478	1.63617	1.32499	1.61623	1.26307
1127fwb50	50	f	2.31188	1.75422	2.22285	2.16868	1.89064	1.6035	1.57888	1.29519	1.48306	1.1994
1152fwb50	50	f	2.25959	1.59196	2.12608	2.15975	1.86333	1.482	1.55343	1.298	1.53962	1.12684
1204fwb50	50	f	2.23384	1.51563	2.03347	2.12881	1.81671	1.49553	1.44114	1.33988	1.50581	1.06855
1217fwb50	50	f	2.25357	1.61303	2.12157	2.10365	1.87917	1.47535	1.495	1.25549	1.52727	1.14591
1218fwb50	50	f	2.21833	1.6496	2.09573	2.06816	1.85859	1.4864	1.38663	1.31356	1.42789	1.20629
1225fwb50	50	f	2.18459	1.62354	2.06503	2.09577	1.85076	1.52517	1.43582	1.29662	1.5645	0.895104
1242fwb50	50	f	2.23868	1.60445	2.13705	2.14834	1.88414	1.53693	1.55736	1.31779	1.62202	1.22629
1249fwb50	50	f	2.28049	1.61719	2.13611	2.15713	1.89212	1.51684	1.53633	1.33677	1.53588	1.1224
1302fwb50	50	f	2.27585	1.59027	2.13261	2.14046	1.84209	1.53691	1.42485	1.34437	1.45531	1.36554
1344fwb50	50	f	2.24248	1.66759	2.14206	2.17171	1.88794	1.56042	1.55702	1.31742	1.57153	1.05623
1349fwb50	50	f	2.2176	1.66288	2.09202	2.10371	1.83085	1.47383	1.44186	1.27906	1.50613	1.02646
1350fwb50	50	f	2.24677	1.67763	2.15163	2.1526	1.90545	1.57581	1.5467	1.37767	1.57568	0.958133
1369fwb50	50	f	2.27188	1.78551	2.23644	2.19589	1.93942	1.65004	1.67887	1.40939	1.7493	1.11948
1410fwb50	50	f	2.29429	1.71906	2.23486	2.18375	1.91658	1.54229	1.68711	1.36462	1.65547	1.14017
1428fwb50	50	f	2.26989	1.81479	2.269	2.19396	1.94616	1.61327	1.70734	1.4184	1.73068	1.10665
1478fwb50	50	f	2.28376	1.68136	2.21507	2.1571	1.90031	1.58629	1.6771	1.35313	1.62901	1.10806
1488fwb50	50	f	2.28666	1.8233	2.29181	2.22198	1.9449	1.52355	1.73927	1.49709	1.72297	1.21697
1494fwb50	50	f	2.29678	1.84819	2.28742	2.21836	1.93688	1.56224	1.70784	1.52051	1.7036	1.26897
1497fwb50	50	f	2.32148	1.7327	2.25374	2.22168	1.89917	1.55127	1.74834	1.45077	1.68534	1.18995
1499fwb50	50	f	2.29594	1.72838	2.24546	2.18163	1.88645	1.57539	1.69098	1.44084	1.68775	0.971288
1500fwb50	50	f	2.31193	1.78764	2.24573	2.18198	1.93022	1.58676	1.7188	1.5238	1.66383	1.118
1510fwb50	50	f	2.29754	1.73775	2.24502	2.18688	1.93226	1.58696	1.67517	1.31808	1.60104	1.22144
1516fwb50	50	f	2.28546	1.71967	2.23703	2.23238	1.96188	1.64063	1.64858	1.49771	1.73338	1.07905
1519fwb50	50	f	2.31294	1.82324	2.26765	2.21527	1.95938	1.63886	1.65495	1.45317	1.72358	1.13363
1362fwi50	50	f	2.30297	1.80274	2.26536	2.18584	1.91556	1.56453	1.71849	1.38431	1.64076	1.11188
1492fwi50	50	f	2.28867	1.68582	2.22534	2.21109	1.92947	1.51447	1.7372	1.37999	1.67129	1.08434
1504fwi50	50	f	2.28525	1.76751	2.235	2.20334	1.91741	1.58541	1.72815	1.50029	1.65968	1.2596
1512fwi50	50	f	2.29804	1.72834	2.24307	2.20933	1.94855	1.63688	1.68025	1.39077	1.61837	1.25405
0179fwi50	50	f	2.28989	1.67936	2.19958	2.20095	1.93813	1.57307	1.65153	1.41978	1.6528	1.14755
0268fwi50	50	f	2.29057	1.74808	2.22813	2.19612	1.95807	1.5962	1.62969	1.32724	1.59246	1.15291
0274fwi50	50	f	2.26976	1.74188	2.20932	2.20124	1.95109	1.61272	1.62347	1.33168	1.69217	0.957974
0330fwi50	50	f	2.29901	1.6447	2.22861	2.20187	1.92436	1.55278	1.66374	1.39059	1.62888	1.32381
0007fwb19	13-19	f	2.29721	1.74665	2.25083	2.18483	1.92984	1.59989	1.69244	1.42279	1.65849	1.16244
0021fwb19	13-19	f	2.29494	1.70003	2.29447	2.23099	1.93881	1.64719	1.71866	1.51587	1.77703	1.47764
0026fwb19	13-19	f	2.2715	1.77138	2.24355	2.17177	1.90529	1.60459	1.75086	1.42742	1.6907	1.18458
0027fwb19	13-19	f	2.30257	1.80565	2.29979	2.14064	1.9117	1.58102	1.66482	1.49487	1.65735	1.28084
0029fwb19	13-19	f	2.30937	1.68959	2.23215	2.20661	1.94478	1.60163	1.73391	1.38642	1.69624	0.937382
0032fwb19	13-19	f	2.28563	1.69223	2.23441	2.15657	1.9104	1.59093	1.61139	1.37634	1.65121	1.12751
0043fwb19	13-19	f	2.29991	1.83863	2.25771	2.17109	1.93046	1.58518	1.67685	1.48409	1.7117	1.0471
0047fwb19	13-19	f	2.30207	1.80487	2.27501	2.2174	1.93538	1.591	1.71316	1.46896	1.66709	1.01214
0050fwb19	13-19	f	2.28206	1.62451	2.17878	2.19984	1.92127	1.56003	1.59256	1.41155	1.61917	1.10078
0053fwb19	13-19	f	2.25337	1.72111	2.21046	2.17468	1.89217	1.48581	1.67503	1.42982	1.67015	1.04236
0062fwb19	13-19	f	2.31181	1.67361	2.2322	2.22262	1.93154	1.60433	1.69147	1.36338	1.68199	1.15021
0310fwi19	13-19	f	2.29715	1.74143	2.25557	2.24246	1.96645	1.60378	1.69174	1.43205	1.7375	1.1224
0386fwi19	13-19	f	2.309	1.79446	2.28108	2.22876	1.95709	1.56857	1.69507	1.39873	1.66166	1.19532
0492fwi19	13-19	f	2.27918	1.73469	2.23185	2.22577	1.96262	1.60788	1.71648	1.48415	1.77768	0.931451
0065fwb29	20-29	f	2.31861	1.74756	2.26256	2.22491	1.95458	1.60961	1.75576	1.51869	1.70423	1.05446
0073fwb29	20-29	f	2.29858	1.77285	2.22876	2.16249	1.94414	1.55899	1.67357	1.52222	1.73963	1.09489
0080fwb29	20-29	f	2.30322	1.80982	2.29021	2.21869	1.98401	1.58338	1.73455	1.5248	1.70956	1.24629
0085fwb29	20-29	f	2.30512	1.73531	2.28299	2.18753	1.92538	1.59555	1.8032	1.43345	1.68999	1.16077
0091fwb29	20-29	f	2.28001	1.78971	2.23567	2.17956	1.90877	1.64284	1.66184	1.4883	1.67626	1.0329
0093fwb29	20-29	f	2.24194	1.72587	2.20301	2.16482	1.88331	1.55012	1.6241	1.41475	1.665	1.02989
0095fwb29	20-29	f	2.30744	1.71995	2.20249	2.15807	1.91941	1.55833	1.62519	1.41342	1.67197	0.90189
0096fwb29	20-29	f	2.28319	1.79391	2.25508	2.16729	1.9469	1.55775	1.71253	1.40686	1.62988	1.12577
0109fwb29	20-29	f	2.28742	1.7718	2.24585	2.212	1.93288	1.56506	1.72328	1.41987	1.62255	1.13961
0120fwb29	20-29	f	2.28588	1.7255	2.22893	2.18217	1.92462	1.55431	1.6587	1.41543	1.6986	1.08859
0124fwb29	20-29	f	2.29545	1.7115	2.24112	2.17261	1.93032	1.56662	1.69384	1.46276	1.66912	1.17192
0125fwb29	20-29	f	2.32793	1.71569	2.26354	2.22373	1.94912	1.60152	1.69044	1.44008	1.6296	1.21838
0126fwb29	20-29	f	2.27504	1.67114	2.20634	2.18949	1.94507	1.60905	1.66294	1.45812	1.66692	1.13009
0141fwb29	20-29	f	2.31277	1.78987	2.27138	2.2007	1.91735	1.53051	1.74952	1.36177	1.69289	1.17243
0146fwb29	20-29	f	2.33032	1.76576	2.26837	2.2391	1.94957	1.58546	1.74457	1.43677	1.7936	0.991684
0147fwb29	20-29	f	2.28182	1.69587	2.21999	2.18951	1.93134	1.57404	1.65748	1.40792	1.70928	1.00712
0148fwb29	20-29	f	2.31122	1.65952	2.21839	2.19713	1.91567	1.59194	1.66548	1.37871	1.61001	1.11852
0149fwb29	20-29	f	2.32891	1.78064	2.28289	2.22033	1.99521	1.66954	1.80055	1.4756	1.71198	1.11178
0155fwb29	20-29	f	2.29989	1.75162	2.25198	2.22902	1.96196	1.63444	1.60497	1.45049	1.73528	1.21503
0157fwb29	20-29	f	2.26733	1.62374	2.16551	2.178	1.91104	1.55512	1.58062	1.35631	1.55746	1.22726
0159fwb29	20-29	f	2.28046	1.74457	2.19337	2.14403	1.91578	1.53226	1.56952	1.2624	1.58087	1.13379
0170fwb29	20-29	f	2.30366	1.73219	2.19342	2.16571	1.88856	1.52526	1.54625	1.34868	1.52586	1.10556
0171fwb29	20-29	f	2.30125	1.73838	2.2053	2.18999	1.9218	1.53484	1.6145	1.33762	1.59185	1.17908
0172fwb29	20-29	f	2.25663	1.79248	2.21792	2.158	1.89688	1.49041	1.61096	1.26316	1.62845	0.968871
1035fwb29	20-29	f	2.28563	1.69223	2.23441	2.15657	1.9104	1.59093	1.61139	1.37634	1.65121	1.12751
1061fwb29	20-29	f	2.2772	1.70476	2.18662	2.16693	1.93324	1.55804	1.52713	1.34372	1.65609	1.0363
1067fwb29	20-29	f	2.27311	1.69762	2.19142	2.17824	1.93245	1.57239	1.62787	1.32428	1.59608	1.09865
1106fwb29	20-29	f	2.2858	1.64913	2.17467	2.16848	1.92304	1.5513	1.6259	1.31113	1.5625	1.21005
1195fwb29	20-29	f	2.25344	1.65625	2.14872	2.14382	1.88811	1.54351	1.58579	1.30854	1.66147	1.15662
1272fwb29	20-29	f	2.27288	1.66484	2.19	2.17086	1.92802	1.50518	1.67734	1.39465	1.66087	1.20195
1274fwb29	20-29	f	2.26955	1.72703	2.2008	2.14738	1.91078	1.56161	1.54383	1.34689	1.62074	1.23183
1294fwb29	20-29	f	2.27001	1.74426	2.23162	2.18447	1.93049	1.5256	1.68176	1.34215	1.63986	1.16707
0218fwi29	20-29	f	2.27189	1.81336	2.25289	2.1745	1.9302	1.57873	1.6242	1.30814	1.54738	1.08697
0273fwi29	20-29	f	2.27632	1.83384	2.2495	2.18278	1.93391	1.58174	1.65745	1.35846	1.6013	1.18471
0332fwi29	20-29	f	2.29138	1.65418	2.19577	2.1518	1.93391	1.58733	1.61879	1.3323	1.57065	1.17408
0336fwi29	20-29	f	2.30975	1.79841	2.24387	2.18372	1.93405	1.54424	1.63689	1.37901	1.58965	1.28919
0389fwi29	20-29	f	2.29443	1.76896	2.25892	2.18235	1.90293	1.54583	1.72589	1.34896	1.64491	1.18362
0391fwi29	20-29	f	2.25656	1.81185	2.24295	2.19708	1.93855	1.61779	1.64094	1.27419	1.61465	1.0886
1304fwb49	30-49	f	2.28423	1.74057	2.24378	2.22072	1.93397	1.54207	1.64953	1.38045	1.59585	1.17363
1306fwb49	30-49	f	2.28374	1.77133	2.23606	2.20193	1.93848	1.58414	1.66022	1.29604	1.65076	1.07184
1309fwb49	30-49	f	2.27284	1.74849	2.22498	2.20004	1.91908	1.53966	1.68289	1.23635	1.63741	1.30728
1319fwb49	30-49	f	2.31693	1.75598	2.25968	2.20102	1.93302	1.60608	1.70322	1.34155	1.62114	1.29943
1327fwb49	30-49	f	2.27748	1.6846	2.19707	2.13806	1.89903	1.46122	1.66739	1.37678	1.6083	1.19998
1329fwb49	30-49	f	2.3022	1.76313	2.20581	2.16645	1.96164	1.5638	1.60096	1.37672	1.68448	1.17178
1373fwb49	30-49	f	2.31797	1.77991	2.2434	2.20034	1.95324	1.60895	1.69904	1.4795	1.66384	1.24173
1374fwb49	30-49	f	2.29221	1.7645	2.20713	2.18758	1.92191	1.54653	1.66381	1.35982	1.66929	1.15275
1376fwb49	30-49	f	2.30422	1.7402	2.27245	2.22368	1.92172	1.5985	1.76246	1.45054	1.64695	1.32696
1379fwb49	30-49	f	2.2851	1.80912	2.26182	2.18944	1.91268	1.55242	1.73703	1.31066	1.65612	1.12336
1386fwb49	30-49	f	2.27236	1.80405	2.26092	2.21428	1.98452	1.54137	1.69702	1.31526	1.58896	1.33169
1389fwb49	30-49	f	2.29317	1.78964	2.24364	2.18373	1.94004	1.57878	1.69088	1.39996	1.63664	1.05016
1393fwb49	30-49	f	2.3009	1.71762	2.25453	2.20612	1.92999	1.6264	1.71581	1.37918	1.62922	1.3345
1395fwb49	30-49	f	2.27846	1.70392	2.2025	2.20976	1.93556	1.55806	1.61791	1.35882	1.66453	1.25289
1396fwb49	30-49	f	2.27292	1.71433	2.23285	2.17417	1.93834	1.63674	1.68403	1.39137	1.65519	1.33062
1401fwb49	30-49	f	2.27509	1.81239	2.2706	2.19825	1.95563	1.57539	1.76645	1.46835	1.71401	1.14618
1403fwb49	30-49	f	2.29693	1.79082	2.29674	2.18203	1.96932	1.64375	1.68707	1.31807	1.66058	1.20439
1407fwb49	30-49	f	2.28612	1.81415	2.23273	2.19057	1.96478	1.61153	1.67346	1.39761	1.69542	1.17605
1412fwb49	30-49	f	2.29329	1.81054	2.28046	2.21539	1.93589	1.58805	1.75214	1.39258	1.74732	1.27374
1418fwb49	30-49	f	2.32135	1.72375	2.25182	2.22542	1.96141	1.69224	1.707	1.46461	1.69651	1.26547
1435fwb49	30-49	f	2.29977	1.71759	2.24249	2.23058	1.92768	1.55567	1.73137	1.37012	1.68213	1.10767
1441fwb49	30-49	f	2.30411	1.63932	2.20016	2.13758	1.9319	1.58152	1.63735	1.41171	1.67336	1.06495
1444fwb49	30-49	f	2.29159	1.71076	2.20422	2.17629	1.92461	1.60474	1.61172	1.46078	1.73562	1.13798
1450fwb49	30-49	f	2.30079	1.77723	2.23336	2.20108	1.95093	1.60628	1.65359	1.4341	1.67771	1.2379
1461fwb49	30-49	f	2.2642	1.73729	2.19443	2.2179	1.89754	1.54471	1.61956	1.38528	1.62632	1.1103
1466fwb49	30-49	f	2.29173	1.78011	2.22246	2.1953	1.93337	1.55538	1.6612	1.39736	1.66783	1.00688
1467fwb49	30-49	f	2.28758	1.64379	2.21077	2.20362	1.92799	1.53627	1.73097	1.34097	1.63807	1.18269
1468fwb49	30-49	f	2.28438	1.86867	2.28169	2.14531	1.90584	1.57158	1.68167	1.36486	1.68405	1.15466
1469fwb49	30-49	f	2.34518	1.77166	2.27596	2.22235	1.95195	1.51501	1.69755	1.34843	1.60904	1.14008
1483fwb49	30-49	f	2.30227	1.77493	2.24666	2.18747	1.91874	1.59368	1.6696	1.36888	1.58728	1.21789
1485fwb49	30-49	f	2.30356	1.69102	2.24604	2.23024	1.9181	1.58274	1.6577	1.39357	1.65353	1.27349
1237fwi49	30-49	f	2.29234	1.71588	2.21416	2.16167	1.91849	1.55461	1.62533	1.29648	1.5317	1.27034
1290fwi49	30-49	f	2.30526	1.81504	2.2476	2.18131	1.95603	1.58221	1.63458	1.43826	1.6773	1.22344
1370fwi49	30-49	f	2.30843	1.6952	2.21353	2.16231	1.94887	1.60037	1.6756	1.34202	1.66224	1.13586
1427fwi49	30-49	f	2.31526	1.73172	2.23135	2.17035	1.93727	1.47459	1.66933	1.37478	1.66011	1.33394
1430fwi49	30-49	f	2.30623	1.79804	2.27764	2.16944	1.93175	1.52196	1.70682	1.40097	1.72513	1.16668
0177fwi49	30-49	f	2.27918	1.72517	2.21865	2.14548	1.94288	1.4932	1.65206	1.41752	1.70279	1.23898
0301fwi49	30-49	f	2.29244	1.74301	2.19221	2.14778	1.90827	1.58755	1.59011	1.48741	1.64457	1.12678
0309fwi49	30-49	f	2.27863	1.78867	2.25172	2.17149	1.9211	1.56177	1.65381	1.3896	1.69266	1.23393
0356fwi49	30-49	f	2.31747	1.7453	2.24177	2.22206	1.95257	1.61765	1.66754	1.42812	1.67044	1.28956
0365fwi49	30-49	f	2.30858	1.77254	2.27646	2.24705	1.92569	1.59201	1.70752	1.37684	1.67846	1.20972
0384fwi49	30-49	f	2.30348	1.67127	2.20828	2.19945	1.95517	1.64642	1.68922	1.44431	1.63953	1.26442
0449fwi49	30-49	f	2.27539	1.78434	2.22298	2.17562	1.94862	1.63105	1.64702	1.36053	1.66632	0.952929
0473fwi49	30-49	f	2.29277	1.67974	2.21837	2.17206	1.91125	1.56996	1.7064	1.36321	1.61489	1.12613
0001mwb12	12	m	2.30115	1.71273	2.26811	2.25587	1.95266	1.60876	1.64938	1.29412	1.61312	1.31813
0002mwb12	12	m	2.30132	1.71168	2.19879	2.19005	1.93563	1.47825	1.66004	1.44714	1.71442	1.0877
0004mwb12	12	m	2.32661	1.70944	2.2476	2.19323	1.97482	1.60435	1.67876	1.432	1.66274	1.15274
0009mwb12	12	m	2.31795	1.81273	2.32065	2.18762	1.9532	1.52794	1.81046	1.37199	1.6191	1.24739
0058mwb12	12	m	2.30621	1.81965	2.29874	2.19335	1.93682	1.54504	1.65424	1.49532	1.70718	1.3007
0063mwb12	12	m	2.28146	1.76425	2.21901	2.16869	1.91221	1.6219	1.60637	1.31671	1.62733	1.28835
0070mwb12	12	m	2.29002	1.80442	2.24838	2.16048	1.9585	1.61509	1.69683	1.34982	1.66707	1.13585
0117mwb12	12	m	2.25232	1.7725	2.22623	2.1986	1.92429	1.57613	1.66422	1.34562	1.66385	1.12484
0129mwb12	12	m	2.28884	1.76249	2.24829	2.21403	1.93517	1.54144	1.69869	1.48166	1.72838	1.17207
0137mwb12	12	m	2.32306	1.75033	2.25728	2.21681	1.97116	1.62279	1.67326	1.53466	1.70726	1.27662
0138mwb12	12	m	2.31547	1.73885	2.21373	2.2089	1.94603	1.54606	1.64006	1.38888	1.70266	1.15103
1016mwb12	12	m	2.30319	1.74023	2.2841	2.22305	1.98032	1.69116	1.73059	1.37071	1.66864	1.36532
1058mwb12	12	m	2.26388	1.7937	2.27987	2.24104	1.9583	1.59195	1.72135	1.42385	1.72179	1.2401
1111mwb12	12	m	2.29914	1.82274	2.27957	2.22408	1.93808	1.54184	1.70608	1.35536	1.66217	1.32594
1157mwb12	12	m	2.28762	1.69147	2.24816	2.16914	1.9241	1.57112	1.7479	1.34419	1.65466	1.33573
1209mwb12	12	m	2.27252	1.86103	2.28058	2.15069	1.89147	1.50622	1.63211	1.3853	1.64179	1.09877
1261mwb12	12	m	2.27715	1.79617	2.26784	2.16419	1.94683	1.54649	1.68949	1.42256	1.68542	1.22003
1268mwb12	12	m	2.25287	1.74021	2.21757	2.16952	1.91894	1.55123	1.70333	1.31574	1.67412	1.18433
1292mwb12	12	m	2.3095	1.7726	2.25497	2.20995	1.91985	1.56768	1.73312	1.40438	1.684	1.24045
1296mwb12	12	m	2.289	1.81492	2.25125	2.20399	1.94241	1.5417	1.62963	1.39137	1.64017	1.28983
1363mwb12	12	m	2.33201	1.79487	2.28655	2.16106	1.951	1.56064	1.71938	1.43951	1.75594	1.39769
0012mwi12	12	m	2.29062	1.79624	2.25727	2.19749	1.94442	1.64324	1.6957	1.37214	1.64882	1.22355
0131mwb50	50	m	2.29993	1.77763	2.21715	2.1692	1.90697	1.53642	1.61551	1.35254	1.58751	1.27809
0168mwb50	50	m	2.31603	1.7858	2.26416	2.23649	1.93752	1.57614	1.70808	1.40823	1.70685	1.25758
0900mwb50	50	m	2.29686	1.71032	2.22981	2.1692	1.92184	1.5402	1.63449	1.40874	1.678	1.31486
1028mwb50	50	m	2.27416	1.688	2.19587	2.18723	1.91205	1.53213	1.61831	1.28722	1.60127	1.07674
1049mwb50	50	m	2.25681	1.76887	2.24895	2.17016	1.90964	1.56881	1.71304	1.45144	1.71888	1.08329
1050mwb50	50	m	2.32285	1.80386	2.26151	2.2378	1.97604	1.59137	1.66867	1.34263	1.70917	1.25065
1082mwb50	50	m	2.28504	1.71538	2.22835	2.20158	1.9375	1.60171	1.66876	1.34085	1.65192	1.1953
1227mwb50	50	m	2.28963	1.56988	2.18506	2.17154	1.89985	1.56785	1.67719	1.42625	1.6736	1.15103
1254mwb50	50	m	2.30009	1.73003	2.24614	2.13165	1.92541	1.52508	1.68635	1.2928	1.65651	1.25054
1347mwb50	50	m	2.27624	1.71195	2.23212	2.20354	1.93556	1.56372	1.68284	1.36933	1.73693	1.32532
1355mwb50	50	m	2.29019	1.76097	2.31026	2.23347	1.97235	1.64257	1.76698	1.4087	1.69605	1.34678
1356mwb50	50	m	2.31032	1.83438	2.26657	2.1986	1.92874	1.51196	1.70063	1.46727	1.69366	1.16757
1357mwb50	50	m	2.2727	1.80825	2.25127	2.19192	1.92779	1.57146	1.69842	1.39132	1.7026	1.21814
1358mwb50	50	m	2.30601	1.76504	2.22271	2.20571	1.94235	1.55638	1.66279	1.41856	1.6869	1.08945
1359mwb50	50	m	2.29122	1.6773	2.20367	2.19016	1.91221	1.4996	1.65305	1.36748	1.64016	1.23765
1390mwb50	50	m	2.27693	1.76462	2.25127	2.19692	1.92476	1.62025	1.66696	1.39185	1.68934	1.23217
1391mwb50	50	m	2.26569	1.70032	2.22861	2.18809	1.87991	1.58813	1.70804	1.45833	1.68671	1.17477
1491mwb50	50	m	2.30148	1.69547	2.23964	2.17523	1.91568	1.54258	1.6921	1.36295	1.68124	1.21673
1498mwb50	50	m	2.27944	1.65497	2.20323	2.17079	1.91375	1.56445	1.69026	1.33923	1.68154	1.23742
1508mwb50	50	m	2.29659	1.72689	2.24949	2.19361	1.94527	1.60227	1.73164	1.35244	1.58148	1.17133
1518mwb50	50	m	2.31115	1.6165	2.22969	2.20838	1.92538	1.58266	1.6865	1.32601	1.6483	0.905192
1110mwi50	50	m	2.27426	1.76581	2.24138	2.17711	1.96122	1.61789	1.68272	1.42518	1.69614	1.27316
1351mwi50	50	m	2.30591	1.77689	2.26984	2.19389	1.93515	1.55789	1.70953	1.39706	1.67996	1.1648
1502mwi50	50	m	2.275	1.68011	2.22948	2.15573	1.87661	1.49979	1.66174	1.39048	1.64015	1.00885
1503mwi50	50	m	2.29412	1.71622	2.27926	2.23943	1.95222	1.5963	1.74493	1.44444	1.68455	1.34763
1507mwi50	50	m	2.31578	1.74172	2.2365	2.17697	1.97454	1.54731	1.69649	1.45174	1.73483	1.11302
0437mwi50	50	m	2.28209	1.7542	2.24265	2.21217	1.9411	1.63258	1.67817	1.44073	1.69713	1.17445
0005mwb19	13-19	m	2.29028	1.74945	2.24704	2.2123	1.95451	1.62665	1.71905	1.46697	1.7123	1.26467
0016mwb19	13-19	m	2.30563	1.73495	2.22467	2.18172	1.93264	1.64737	1.67311	1.351	1.60381	1.16058
0017mwb19	13-19	m	2.2878	1.70784	2.21802	2.15585	1.92529	1.58975	1.67031	1.30636	1.67902	1.12681
0019mwb19	13-19	m	2.2857	1.69838	2.23138	2.18675	1.93471	1.5848	1.70006	1.50531	1.69193	1.17746
0022mwb19	13-19	m	2.29478	1.75108	2.25233	2.21389	1.9295	1.58809	1.63893	1.43224	1.68484	1.29767
0035mwb19	13-19	m	2.30142	1.72116	2.23005	2.17277	1.9399	1.47766	1.67843	1.35578	1.69145	1.01795
0037mwb19	13-19	m	2.31317	1.68931	2.24689	2.14147	1.92525	1.58259	1.70278	1.43531	1.66262	1.10485
0040mwb19	13-19	m	2.31666	1.70955	2.25018	2.24741	1.95528	1.58309	1.67737	1.43031	1.65801	1.2363
0042mwb19	13-19	m	2.31846	1.72887	2.26932	2.21709	1.92063	1.58862	1.74933	1.39357	1.72501	1.10769
0044mwb19	13-19	m	2.32379	1.69268	2.20825	2.21252	1.96644	1.60146	1.67916	1.49665	1.67929	1.06889
0046mwb19	13-19	m	2.32991	1.73228	2.25239	2.21029	1.94716	1.57401	1.70266	1.36413	1.63267	1.20539
0049mwb19	13-19	m	2.30377	1.75397	2.23079	2.22088	1.95064	1.63327	1.71072	1.42191	1.78127	1.11711
0061mwb19	13-19	m	2.28622	1.6362	2.18738	2.21489	1.93067	1.5902	1.61989	1.35319	1.70562	1.11076
0066mwb29	20-29	m	2.31664	1.61899	2.2037	2.19256	1.94139	1.55984	1.67717	1.38481	1.69908	1.17366
0077mwb29	20-29	m	2.3046	1.64261	2.21175	2.2134	1.92004	1.65528	1.68974	1.37094	1.67459	1.11269
0083mwb29	20-29	m	2.3215	1.73628	2.26046	2.21432	1.96118	1.57769	1.67969	1.47458	1.72866	1.06772
0087mwb29	20-29	m	2.29768	1.7441	2.21753	2.19541	1.91422	1.52389	1.67018	1.42187	1.72706	0.930532
0094mwb29	20-29	m	2.32527	1.78805	2.28317	2.22856	1.94784	1.60899	1.74892	1.35212	1.68929	1.18045
0098mwb29	20-29	m	2.30865	1.82748	2.26109	2.1459	1.87695	1.52337	1.60316	1.37747	1.56627	1.14133
0099mwb29	20-29	m	2.28359	1.82965	2.26756	2.18994	1.90307	1.55188	1.73496	1.38801	1.70629	1.03151
0107mwb29	20-29	m	2.25492	1.63758	2.13833	2.16148	1.93126	1.60755	1.52311	1.25585	1.56833	1.12102
0121mwb29	20-29	m	2.30086	1.71165	2.1797	2.18439	1.89372	1.54865	1.54646	1.3038	1.57105	1.09123
0127mwb29	20-29	m	2.30673	1.71018	2.24072	2.23785	1.95825	1.63855	1.66738	1.56439	1.78779	1.14929
0128mwb29	20-29	m	2.29176	1.72091	2.27473	2.26812	1.98212	1.63497	1.70206	1.3986	1.72058	1.12026
0145mwb29	20-29	m	2.2944	1.63278	2.26259	2.22482	1.9286	1.61475	1.77886	1.43483	1.71117	1.42534
0151mwb29	20-29	m	2.3116	1.76534	2.26852	2.15836	1.93766	1.54778	1.6981	1.39052	1.58913	1.40585
0164mwb29	20-29	m	2.32134	1.72064	2.25431	2.19443	1.9135	1.61196	1.70907	1.46984	1.71587	1.1609
0169mwb29	20-29	m	2.27042	1.7008	2.22365	2.22054	1.93001	1.57294	1.66611	1.43109	1.73632	1.00993
0174mwb29	20-29	m	2.29578	1.76636	2.25754	2.17973	1.95084	1.58243	1.67762	1.42642	1.68135	1.14569
1041mwb29	20-29	m	2.32327	1.70765	2.22562	2.21626	1.93454	1.57281	1.6936	1.33858	1.68193	0.922178
1045mwb29	20-29	m	2.30255	1.74834	2.26467	2.21613	1.95546	1.60691	1.75753	1.39844	1.66579	1.05174
1055mwb29	20-29	m	2.27933	1.73917	2.24367	2.20202	1.91828	1.49366	1.66187	1.33331	1.67407	1.20919
1162mwb29	20-29	m	2.32192	1.71663	2.26626	2.22383	1.96438	1.56461	1.69485	1.33409	1.65918	1.2793
1193mwb29	20-29	m	2.29229	1.77569	2.24874	2.19287	1.95097	1.55526	1.64759	1.29254	1.62318	1.24128
1200mwb29	20-29	m	2.29747	1.6517	2.19948	2.1869	1.90839	1.53323	1.66092	1.41712	1.72343	1.1844
1256mwb29	20-29	m	2.27454	1.73026	2.22137	2.15986	1.92169	1.5622	1.6861	1.27733	1.60101	0.993602
1266mwb29	20-29	m	2.32209	1.78937	2.27058	2.18423	1.917	1.58373	1.67615	1.48142	1.73363	1.28341
1275mwb29	20-29	m	2.32229	1.71856	2.25339	2.222	1.95712	1.57859	1.70001	1.38342	1.67093	1.22151
1303mwb29	20-29	m	2.30367	1.70973	2.22189	2.16932	1.92538	1.54066	1.67873	1.37759	1.66514	1.20628
0222mwi29	20-29	m	2.28003	1.78596	2.22531	2.11007	1.90013	1.52692	1.62991	1.3051	1.64121	1.25197
0279mwi29	20-29	m	2.30837	1.74033	2.24889	2.1963	1.947	1.62051	1.73118	1.40203	1.65578	1.1245
0307mwi29	20-29	m	2.30121	1.91597	2.35789	2.1843	1.98308	1.50213	1.63256	1.49698	1.75091	1.22449
0308mwi29	20-29	m	2.30456	1.76503	2.28446	2.17289	1.95358	1.57086	1.68976	1.33746	1.70355	1.11652
0337mwi29	20-29	m	2.29666	1.65365	2.21436	2.15509	1.8752	1.59569	1.64014	1.39174	1.64627	1.16228
1305mwb49	30-49	m	2.31369	1.71827	2.23317	2.21853	1.91766	1.56461	1.67867	1.41395	1.65125	1.18559
1313mwb49	30-49	m	2.32698	1.70254	2.25825	2.1929	1.93796	1.56458	1.65955	1.38897	1.79272	1.23817
1335mwb49	30-49	m	2.29082	1.76479	2.2561	2.16971	1.96934	1.6065	1.69103	1.40686	1.62674	1.32275
1380mwb49	30-49	m	2.32486	1.67311	2.26622	2.2328	1.94728	1.59711	1.66347	1.46006	1.80141	1.34184
1384mwb49	30-49	m	2.29327	1.61836	2.20097	2.21249	1.8897	1.54983	1.66143	1.38623	1.62104	1.1173
1388mwb49	30-49	m	2.2865	1.75932	2.24227	2.17699	1.90434	1.54386	1.6632	1.2546	1.69928	1.24673
1406mwb49	30-49	m	2.28232	1.75345	2.24866	2.21972	1.92343	1.59297	1.68585	1.41391	1.6542	1.05442
1409mwb49	30-49	m	2.29764	1.738	2.25009	2.2226	1.91586	1.58176	1.74021	1.46657	1.6857	1.21879
1415mwb49	30-49	m	2.30835	1.72563	2.26122	2.20819	1.93168	1.52424	1.68155	1.49337	1.72668	1.21778
1425mwb49	30-49	m	2.30764	1.70049	2.25313	2.22438	1.91219	1.60853	1.64938	1.4538	1.61776	1.32189
1434mwb49	30-49	m	2.2839	1.66997	2.21524	2.14698	1.90342	1.53022	1.66309	1.3461	1.58205	1.31564
1442mwb49	30-49	m	2.29347	1.77078	2.23438	2.20827	1.90632	1.52367	1.64367	1.2757	1.70281	1.16403
1445mwb49	30-49	m	2.28716	1.69893	2.24902	2.24349	1.95227	1.56497	1.74258	1.4292	1.66989	1.19366
1451mwb49	30-49	m	2.24997	1.6886	2.19556	2.17514	1.93091	1.5625	1.68359	1.41498	1.61979	1.1509
1453mwb49	30-49	m	2.29441	1.80821	2.24547	2.09902	1.91825	1.55409	1.63842	1.27736	1.64186	1.25298
1455mwb49	30-49	m	2.30245	1.6538	2.22783	2.20424	1.95566	1.62352	1.69139	1.44468	1.58149	1.12192
1470mwb49	30-49	m	2.30127	1.77482	2.28482	2.22151	1.95565	1.57159	1.64903	1.3581	1.67323	1.17978
1474mwb49	30-49	m	2.30646	1.73797	2.24044	2.18425	1.91409	1.50885	1.72038	1.33987	1.63719	1.00984
1477mwb49	30-49	m	2.31063	1.65727	2.20915	2.16503	1.90474	1.56282	1.69493	1.36902	1.661	1.09794
0076mwi49	30-49	m	2.30718	1.69468	2.20608	2.1894	1.9165	1.55387	1.66613	1.3649	1.65502	1.0638
0097mwi49	30-49	m	2.30851	1.7636	2.26645	2.23258	1.94533	1.55536	1.67259	1.3248	1.65657	1.37862
1420mwi49	30-49	m	2.28833	1.74223	2.24854	2.23921	1.93063	1.5423	1.69034	1.34584	1.63654	1.21686
1422mwi49	30-49	m	2.28059	1.69594	2.20596	2.15592	1.91335	1.5598	1.66209	1.37529	1.59324	1.07682
1476mwi49	30-49	m	2.26528	1.76737	2.23266	2.17362	1.89961	1.52711	1.6703	1.38177	1.64797	1.17184
1480mwi49	30-49	m	2.28497	1.71133	2.23948	2.18663	1.94457	1.57632	1.69525	1.36502	1.67705	1.1377
0180mwi49	30-49	m	2.28027	1.71536	2.23046	2.16878	1.90953	1.56393	1.72349	1.31931	1.71156	1.21203
0207mwi49	30-49	m	2.27948	1.67643	2.22658	2.19046	1.94242	1.56485	1.69015	1.40826	1.60405	1.19388
0282mwi49	30-49	m	2.29822	1.68053	2.20816	2.14219	1.91337	1.63259	1.64015	1.42896	1.65047	1.26557
0292mwi49	30-49	m	2.32703	1.75339	2.27879	2.2092	1.97635	1.60841	1.65828	1.39126	1.71465	1.18535
0318mwi49	30-49	m	2.31651	1.7759	2.2962	2.23569	1.95157	1.65064	1.73755	1.40978	1.81583	1.34978
0326mwi49	30-49	m	2.30673	1.76845	2.29153	2.22132	1.97019	1.5414	1.73064	1.43698	1.73816	1.30657
0343mwi49	30-49	m	2.26629	1.76129	2.23358	2.20319	1.93865	1.56006	1.66613	1.46806	1.61465	1.23835
0396mwi49	30-49	m	2.30067	1.75402	2.24019	2.17535	1.88804	1.47341	1.71852	1.44725	1.66885	1.05481
0399mwi49	30-49	m	2.29267	1.80635	2.22589	2.18665	1.89571	1.58177	1.61507	1.31713	1.58168	1.10421
0493mwi49	30-49	m	2.28499	1.8056	2.25122	2.23258	1.94519	1.57203	1.62492	1.47211	1.72303	1.11225
1476mwi49	30-49	m	2.26528	1.76737	2.23266	2.17362	1.89961	1.52711	1.6703	1.38177	1.64797	1.17184
1480mwi49	30-49	m	2.28497	1.71133	2.23948	2.18663	1.94457	1.57632	1.69525	1.36502	1.67705	1.1377
0180mwi49	30-49	m	2.28027	1.71536	2.23046	2.16878	1.90953	1.56393	1.72349	1.31931	1.71156	1.21203
